# Supplementary material
Source: publisher figshare collection journal article supplement (https://diabetesjournals.figshare.com/articles/dataset/_/24615675)
Supplement: Supplementary file 1 [file 2]

## Sheet: Sheet1
Supplemental Table S1
Reagent	Catalog Number	Research Design & Methods
GIPZ lentiviral shRNA human RFX6	Dharmacon #RHS4430-200199940	Construct and lentiviral production
GIPZ non-targeting lentiviral control	Dharmacon #RHS4346	Construct and lentiviral production
RFX6 human tagged ORF clone, Myc-DDK-tagged	OriGene Technologies #RC206174L3	Construct and lentiviral production
TransIT-LT1 transfection reagent	Mirus Bio #MIR 2305	Construct and lentiviral production
pMD2.G packaging plasmid	Addgene #12259	Construct and lentiviral production
psPAX2 packaging plasmid	Addgene #12260	Construct and lentiviral production
PEG-it virus precipitation solution	System Biosciences #LV825A-1	Construct and lentiviral production
Accumax - cell aggregate dissociation medium	Invitrogen #00-4666-56	Whole pseudoislet generation, MagSep pseudoislet generation
Corning Costar 96-well, ultra-low binding, flat-bottom microplate	Thermo Fisher Scientific #07-200-603	Whole pseudoislet generation, MagSep pseudoislet generation
RPMI 1640 no glucose	Thermo Fisher Scientific #MT-10043CV	Whole pseudoislet generation
RPMI 1640	Thermo Fisher Scientific #MT10040CV	Whole pseudoislet generation
Penicillin-streptomycin (10000U/ml)	Thermo Fisher Scientific #15140163	Whole pseudoislet generation
HyClone defined fetal bovine serum, US origin	Cytiva #SH30070.03	Whole pseudoislet generation
EasySep release human PE positive selection kit	STEMCELL Technologies #17654	MagSep pseudoislet generation
PE anti-human CD26 antibody	BioLegend #302706	MagSep pseudoislet generation
Aggrewell400 microwell culture plates	STEMCELL Technologies #34415	MagSep pseudoislet generation
PicoPure RNA isolation kit	Life Technologies #KIT0204	RNA extraction and quantitative RT-PCR
Maxima first strand cDNA synthesis kit	Thermo Fisher Scientific #FERK1642	RNA extraction and quantitative RT-PCR
Taqman gene expression master mix	Thermo Fisher Scientific #4369514	RNA extraction and quantitative RT-PCR
Taqman probe: ACTIN-B	Life Technologies Hs4352667_m1	RNA extraction and quantitative RT-PCR
Taqman probe: INSULIN	Life Technologies Hs00355773_m1	RNA extraction and quantitative RT-PCR
Taqman probe: GLUCAGON	Life Technologies Hs00174967_m1	RNA extraction and quantitative RT-PCR
Taqman probe: SOMATOSTATIN	Life Technologies Hs00356144_m1	RNA extraction and quantitative RT-PCR
Taqman probe: RFX6	Life Technologies Hs00941591_m1	RNA extraction and quantitative RT-PCR
Taqman probe: RFX3	Life Technologies Hs01060440_m1	RNA extraction and quantitative RT-PCR
Taqman probe: CACNA1A	Life Technologies Hs01579431_m1	RNA extraction and quantitative RT-PCR
Taqman probe: CACNA1C	Life Technologies Hs00167681_m1	RNA extraction and quantitative RT-PCR
Taqman probe: CACNA1D	Life Technologies Hs00167753_m1	RNA extraction and quantitative RT-PCR
Taqman probe: CACN2B	Life Technologies Hs01100744_m1	RNA extraction and quantitative RT-PCR
Taqman probe: SLC5A1	Life Technologies Hs01573793_m1	RNA extraction and quantitative RT-PCR
Taqman probe: ABCC8	Life Technologies Hs01093761_m1	RNA extraction and quantitative RT-PCR
Taqman probe: GCK	Life Technologies Hs01564555_m1	RNA extraction and quantitative RT-PCR
StemPro accutase cell dissociation reagent	ThermoFisher #A1110501	Patch clamp electrophysiology
Corning 35mm TC-treated culture dishes	Corning #430165	Patch clamp electrophysiology
DMEM	ThermoFisher #11885084	Patch clamp electrophysiology
Fetal bovine serum, qualified, Canada	Invitrogen #12483020	Patch clamp electrophysiology
Penicillin-streptomycin (5000U/ml)	ThermoFisher #15070063	Patch clamp electrophysiology
Mouse monoclonal anti-glucagon antibody	Sigma #G2654	Patch clamp electrophysiology
Goat anti-mouse antibody, Alexa Fluor 594	ThermoFisher #A-11032	Patch clamp electrophysiology
Patchmaster software	SmartEphys HEKA Electronik	Patch clamp electrophysiology
Thick wall borosilicate glass tubes	Sutter #BF150-86-7.5	Patch clamp electrophysiology
FitMaster software	SmartEphys HEKA Electronik	Patch clamp electrophysiology
UltraPure 1M Tris-HCl buffer, pH 7.5	Thermo Fisher Scientific #15-567-027	In vitro glucose-stimulated glucagon and insulin secretion assays
EDTA (0.5M), pH 8.0, Rnase-free	Invitrogen #AM9250G	In vitro glucose-stimulated glucagon and insulin secretion assays
BSA, heat shock treated	Thermo Fisher Scientific #BP1600-100	In vitro glucose-stimulated glucagon and insulin secretion assays
Quick-DNA microprep kit	Zymo Research #D3021	In vitro glucose-stimulated glucagon and insulin secretion assays
Glucagon ELISA	Mercodia #10127101	In vitro glucose-stimulated glucagon and insulin secretion assays
Human insulin ELISA	Mercodia #10111301	In vitro glucose-stimulated glucagon and insulin secretion assays
Matrigel Growth Factor Reduced	Corning #CB-40230C	Human islet transplantation
HumuLIN R, 100U/mL	NDC #0002-8215-01	Insulin tolerance test
LIVE/DEAD fixable near-IR dead cell stain kit	Life Technologies #L34976	Cell surface staining and FACs of human islet cells
AF647 anti-human NTPDase3	Jean Sévigny Lab clone hN3-B3S	Cell surface staining and FACs of human islet cells
PE anti-human CD26	BioLegend #302706	Cell surface staining and FACs of human islet cells
PE/Dazzle 594 anti-human CD45	BioLegend #304052	Cell surface staining and FACs of human islet cells
PE-Cy7-HPi2	Novus Biologicals #NBP1-18946PECY7	Cell surface staining and FACs of human islet cells
FACS Aria II	BD Biosciences	Cell surface staining and FACs of human islet cells
Cell staining buffer	BioLegend #420201	Cell surface staining and FACs of human islet cells
Ribolock Rnase inhibitor (40U/ul)	Thermo Fisher Scientific #FEREO0384	Cell surface staining and FACs of human islet cells
FlowJo software	FlowJo, LLC	Cell surface staining and FACs of human islet cells
SMART-seq v4 ultra low input RNA kit	Clontech #634893	Bulk RNA-sequencing and data analysis
Nextera XT DNA library preparation kit	Illumina #FC-131-1096	Bulk RNA-sequencing and data analysis
Spermidine	Sigma Aldrich #S2626-1G	CUT&RUN and data analysis
Halt protease and phosphotase inhibitor single-use cocktail, EDTA-free (100x)	Thermo Scientific #78443	CUT&RUN and data analysis
Rabbit anti-FLAG antibody	Sigma-Millipore #F7425-.2MG	CUT&RUN and data analysis; Immunohistochemistry
Rabbit anti-IgG antibody	EpiCypher #14-1048	CUT&RUN and data analysis
pAG-Mnase	EpiCypher #15-1016	CUT&RUN and data analysis
CUTANA ChIC/CUT&RUN	EpiCypher #14-1048	CUT&RUN and data analysis
CUTANA CUT&RUN library prep kit	EpiCypher #14-1002	CUT&RUN and data analysis
RIPA lysis and extraction buffer	Thermo Fisher Scientific #89900	Western blot
Halt protease inhibitor cocktail, EDTA-free (100x)	Thermo Fisher Scientific #78437	Western blot
Microcon-30kDA centrifugal filter unit with Ultracell-30 membrane	Millipore #MRCF0R030	Western blot
4-15% mini-PROTEAN TGX precast protein gel, 10 well	Bio-Rad #4561084	Western blot
Rabbit polyclonal anti-RFX6 antibody	Novus #NBP2-48677	Western blot
Donkey anti-rabbit antibody, HRP conjugated	Thermo Fisher #A16035	Western blot
SuperSignal west pico PLUS chemiluminescent substrate	Thermo Fisher #34577	Western blot
HyBlot CL autoradiography film	Thomas Scientific #1141J52	Western blot
Konica Minolta medical film processor	SRX-101A	Western blot
Collagen gel culturing kit	Wako Chemicals #638-00781	Immunohistochemistry
Guinea pig polyclonal anti-glucagon antibody	Takara Bio #M182	Immunohistochemistry
Rat monoclonal anti-insulin antibody	R&D MAB1417	Immunohistochemistry
Rabbit anti-somatostatin antibody	Dako A056601-2	Immunohistochemistry
Goat anti-guinea pig antibody, AF555	Thermo Fisher Scientific #A21435	Immunohistochemistry
Donkey anti-rat antibody, AF555	Thermo Fisher Scientific #A48270	Immunohistochemistry
Donkey anti-rabbit antibody, AF555	Thermo Fisher Scientific #A31572	Immunohistochemistry
Donkey anti-guinea pig antibody, AF488	Jackson ImmunoResearch #706-545-148	Immunohistochemistry
VECTASHIELD PLUS antifade mounting medium with DAPI	Vector Labs #H-2000-10	Immunohistochemistry
