# Supplementary material
Source: publisher figshare collection journal article supplement (https://diabetesjournals.figshare.com/articles/dataset/_/24615675)
Supplement: Supplementary file 1 [file 2]

Supplemental Figure S4

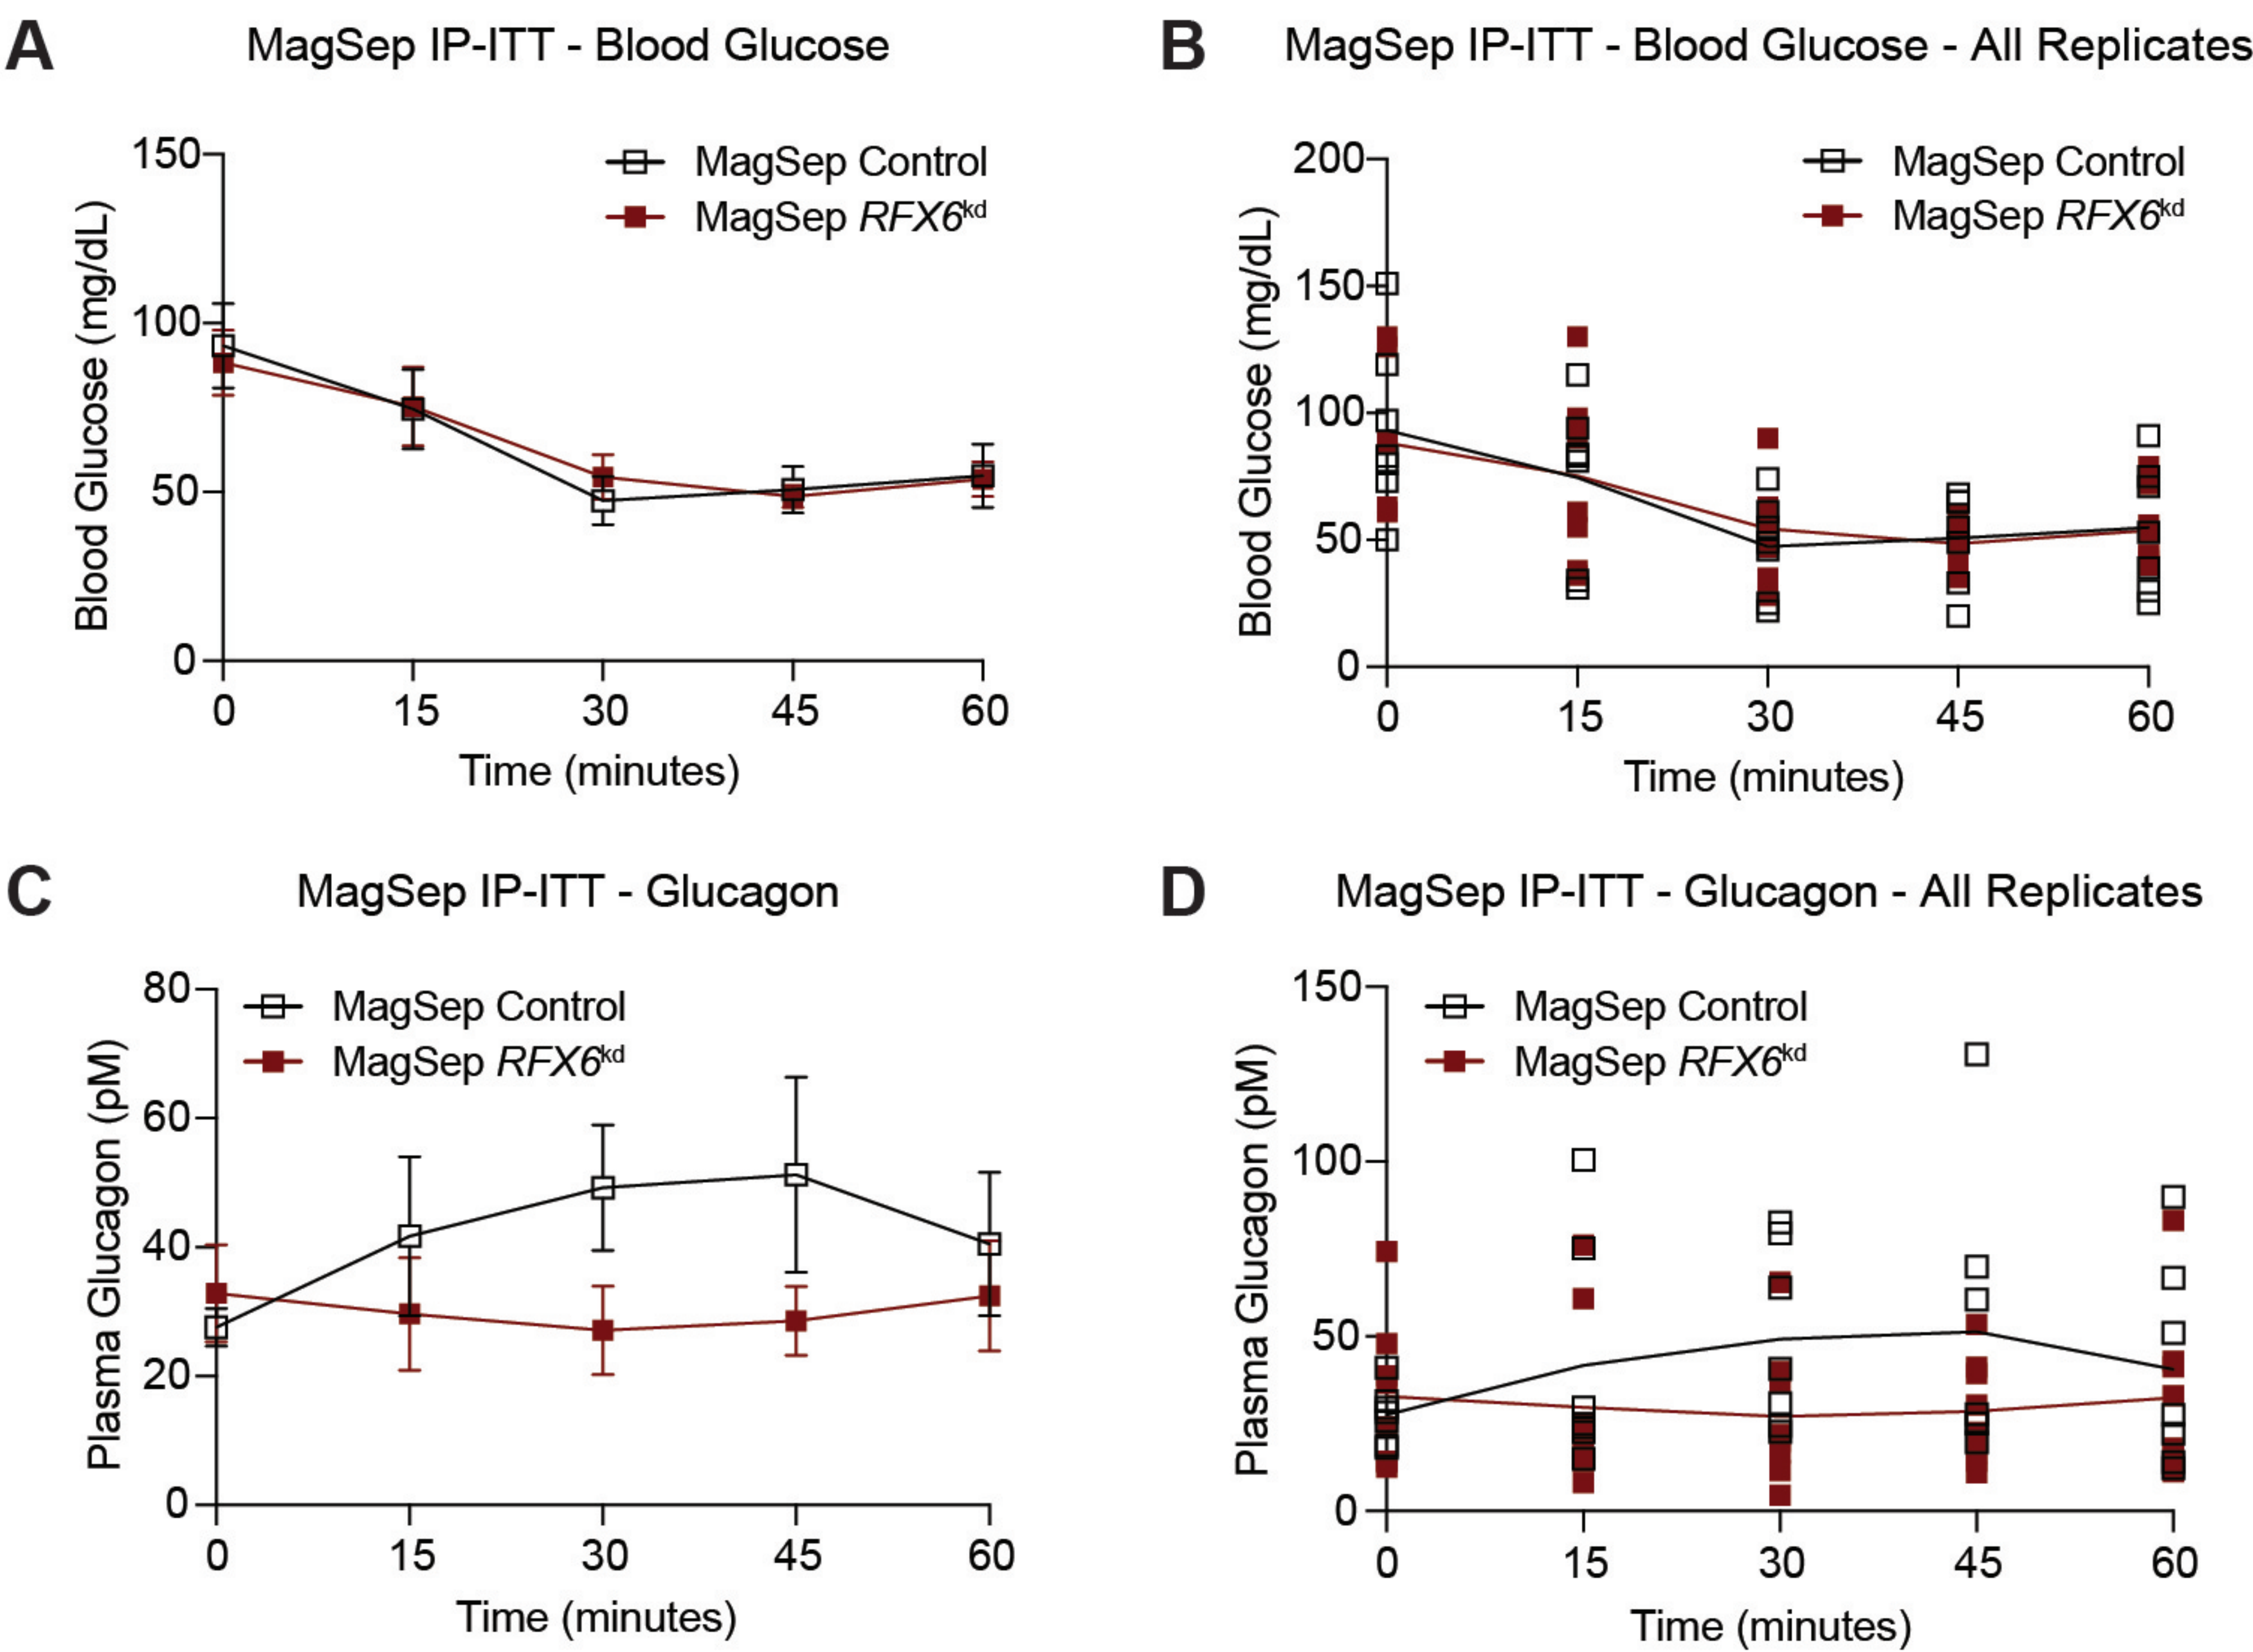

**Figure S4. IP-ITT of MagSep pseudoislet transplanted GKO-NSG mice.** Summary (A,C) or individually plotted (B,D) blood glucose (A-G) and plasma glucagon (H-N) curves upon intraperitoneal insulin tolerance test (IP-ITT) after transplantation of donor-matched MagSep control (n=7 mice) and *RFX6*<sup>kd</sup> (n=8 mice) pseudoislets to GKO-NSG mice; n=7 donors. The data are presented as mean values ± SEM or individual replicates.
