# Supplementary material
Source: publisher figshare collection journal article supplement (https://diabetesjournals.figshare.com/articles/dataset/_/24615675)
Supplement: Supplementary file 2 [file 2]

# Supplemental Figure S6

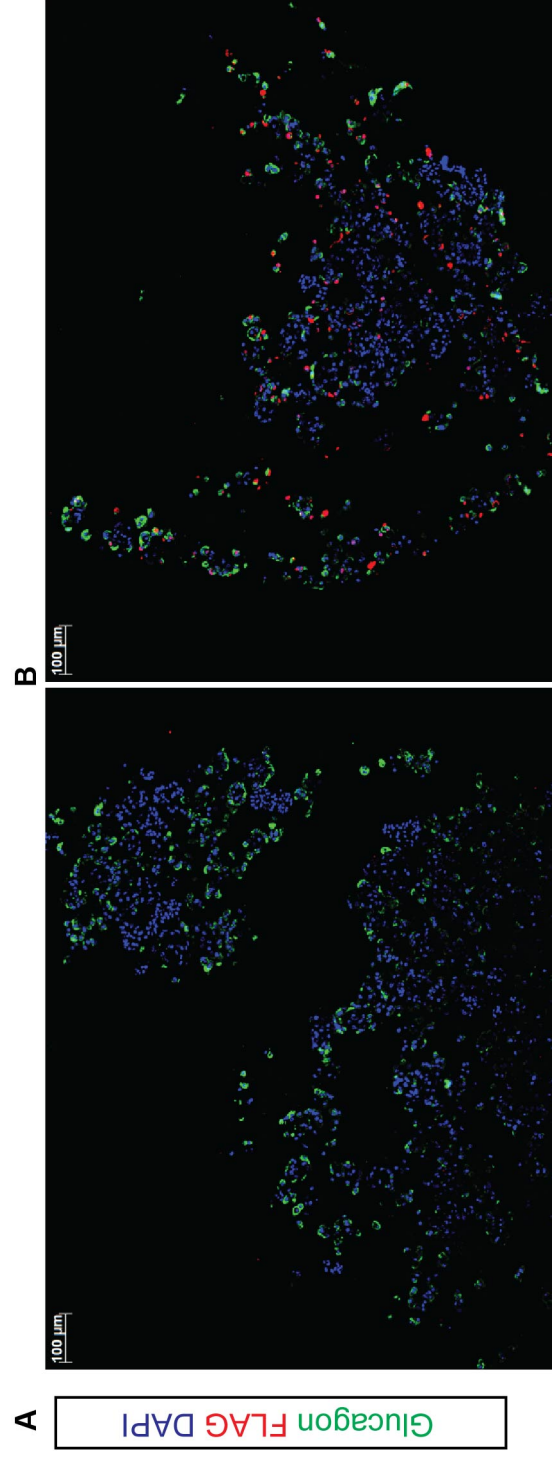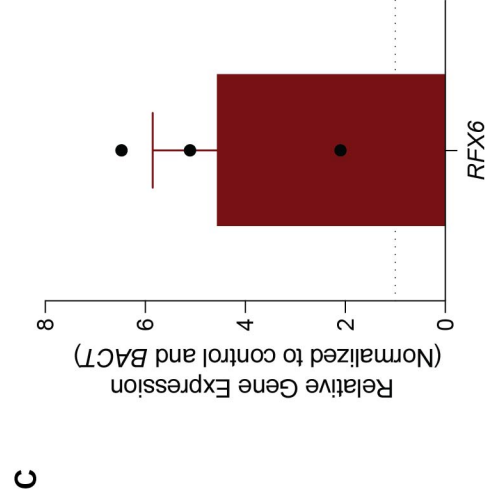

**Figure S6. RFX6-FLAG overexpression in CUT&RUN pseudoislets.** Immunostaining of empty control (A) and RFX6-FLAG (B) lentivirus transduced pseudoislets embedded in collagen; scale bar=100 $\mu\text{m}$ . (C) RFX6 expression of RFX6-FLAG pseudoislets normalized to empty control pseudoislets and BACT. Data are presented as values  $\pm$  SEM.
