# Supplementary material
Source: publisher figshare collection journal article supplement (https://diabetesjournals.figshare.com/articles/dataset/_/24615675)
Supplement: Supplementary file 3 [file 2]

**Supplemental Table S5**

|              | baseMean   | log2FoldChan | lfcSE      | stat       | pvalue     | padj       |
|--------------|------------|--------------|------------|------------|------------|------------|
| IFI6         | 11824.6346 | 1.39587505   | 0.14164044 | 9.85506027 | 6.52E-23   | 9.14E-19   |
| ISG15        | 2341.71735 | 1.32413057   | 0.15530058 | 8.52624336 | 1.51E-17   | 1.06E-13   |
| GDF15        | 6392.14948 | 0.96571222   | 0.12490177 | 7.73177352 | 1.06E-14   | 4.96E-11   |
| MX1          | 4731.36948 | 0.78779364   | 0.11917459 | 6.61041646 | 3.83E-11   | 1.07E-07   |
| IFIT3        | 2206.28545 | 1.07554919   | 0.18037421 | 5.96287695 | 2.48E-09   | 5.79E-06   |
| IFIT1        | 3629.16848 | 0.91270475   | 0.16595366 | 5.49975683 | 3.80E-08   | 5.69E-05   |
| CFTR         | 206.00342  | 2.25104919   | 0.41529259 | 5.42039333 | 5.95E-08   | 6.41E-05   |
| IFITM3       | 704.141764 | 1.06935433   | 0.20961303 | 5.10156413 | 3.37E-07   | 0.00026234 |
| KRT7         | 387.701347 | 1.64083815   | 0.3286395  | 4.99282083 | 5.95E-07   | 0.0003972  |
| CTSE         | 52.1358618 | 3.72941456   | 0.78963125 | 4.72298246 | 2.32E-06   | 0.00125305 |
| GSTA1        | 56.9639706 | 2.39210934   | 0.50614102 | 4.72617171 | 2.29E-06   | 0.00125305 |
| CFB          | 1229.23123 | 0.94424888   | 0.20604165 | 4.58280582 | 4.59E-06   | 0.00229684 |
| SERPINA3     | 1325.31734 | 2.21426013   | 0.49785638 | 4.44758815 | 8.68E-06   | 0.00419766 |
| VCAM1        | 43.2643296 | 3.46296464   | 0.79299745 | 4.36693034 | 1.26E-05   | 0.00588779 |
| UBE2L6       | 2101.60113 | 0.63445094   | 0.14921922 | 4.25180457 | 2.12E-05   | 0.00829359 |
| SAMD9        | 1540.11628 | 0.58957878   | 0.14084813 | 4.18591844 | 2.84E-05   | 0.01047718 |
| CTGF         | 112.624665 | 1.55454067   | 0.3814168  | 4.07570055 | 4.59E-05   | 0.01398022 |
| TINAGL1      | 129.998347 | 1.59676111   | 0.39310628 | 4.06190687 | 4.87E-05   | 0.01451713 |
| PLVAP        | 28.3013417 | 5.16367768   | 1.2745044  | 4.05151811 | 5.09E-05   | 0.01486095 |
| LAMP3        | 389.170906 | 0.93015527   | 0.23039467 | 4.03722566 | 5.41E-05   | 0.01486651 |
| P2RY8        | 14.2393664 | 5.25034476   | 1.31845138 | 3.98220583 | 6.83E-05   | 0.01805905 |
| DDX60        | 1122.85731 | 0.66603377   | 0.17010425 | 3.9154446  | 9.02E-05   | 0.02143988 |
| STAT1        | 7134.53747 | 0.47861013   | 0.12271841 | 3.90006792 | 9.62E-05   | 0.0220992  |
| SPP1         | 23433.2295 | 0.53972878   | 0.13873844 | 3.89026116 | 0.00010014 | 0.02264052 |
| RPS27L       | 3859.2847  | 0.49509452   | 0.12828913 | 3.85920879 | 0.00011376 | 0.02453252 |
| PSME2        | 2683.1174  | 0.53135851   | 0.13950715 | 3.80882635 | 0.00013963 | 0.02836674 |
| SERPINA5     | 48.9682192 | 2.27172848   | 0.60032679 | 3.78415308 | 0.00015423 | 0.02903073 |
| PHLDA3       | 1456.0804  | 0.53287274   | 0.14088209 | 3.7824023  | 0.00015532 | 0.02903073 |
| FGB          | 693.324988 | 0.86723628   | 0.23136474 | 3.7483511  | 0.000178   | 0.03119022 |
| IL32         | 167.397696 | 1.29307058   | 0.35145805 | 3.67916058 | 0.000234   | 0.03859121 |
| PARP12       | 1117.59042 | 0.55711118   | 0.15202277 | 3.66465603 | 0.00024767 | 0.03990638 |
| CXCR4        | 292.57167  | 0.91112855   | 0.24929495 | 3.6548216  | 0.00025736 | 0.04099642 |
| CD9          | 771.001856 | 0.75130819   | 0.20581233 | 3.65045274 | 0.00026178 | 0.04123158 |
| SPINK1       | 1685.8975  | 0.60880265   | 0.16861399 | 3.61062958 | 0.00030546 | 0.04654199 |
| RP11.108O10  | 13.9154569 | 5.03239315   | 1.3967186  | 3.60301149 | 0.00031455 | 0.04690835 |
| RSAD2        | 2398.05988 | 0.65676747   | 0.18363672 | 3.57644966 | 0.00034829 | 0.05085794 |
| LY6E         | 521.542189 | 0.8386231    | 0.23572871 | 3.55757726 | 0.00037429 | 0.0529981  |
| RP11.691N7.6 | 23.1266742 | 4.14285075   | 1.16989302 | 3.54122187 | 0.00039828 | 0.05578244 |
| CRP          | 22.8686806 | 3.65977563   | 1.0503739  | 3.48425988 | 0.0004935  | 0.06458822 |
| ALB          | 73.6346445 | 1.66211878   | 0.47821649 | 3.47566178 | 0.0005096  | 0.06494087 |
| DDX58        | 1314.88863 | 0.56546444   | 0.1630132  | 3.46882619 | 0.00052274 | 0.06601563 |

|             |            |            |            |            |            |            |
|-------------|------------|------------|------------|------------|------------|------------|
| REG3A       | 1960.52306 | 3.15621894 | 0.91237859 | 3.45933036 | 0.00054152 | 0.06658799 |
| KCNJ15      | 14.328361  | 4.78590434 | 1.38674118 | 3.45118788 | 0.00055813 | 0.067951   |
| TSPAN8      | 133.547411 | 1.51489397 | 0.43920457 | 3.44917621 | 0.0005623  | 0.067951   |
| ANXA4       | 982.853558 | 0.56591207 | 0.1656071  | 3.41719685 | 0.0006327  | 0.07390934 |
| RHBDF1      | 29.9981956 | 3.01438233 | 0.88513955 | 3.40554473 | 0.00066032 | 0.07528717 |
| SLC34A2     | 15.3784901 | 4.64385254 | 1.37248161 | 3.38354446 | 0.00071557 | 0.07912008 |
| TACSTD2     | 173.552711 | 1.29578944 | 0.38401249 | 3.3743419  | 0.00073992 | 0.08103325 |
| OLFM4       | 637.787048 | 2.99885512 | 0.89022986 | 3.36863012 | 0.00075543 | 0.08208977 |
| SMIM11A     | 402.242292 | 0.88206582 | 0.26276202 | 3.35690001 | 0.00078822 | 0.08499395 |
| RPS19       | 5307.28472 | 0.41841577 | 0.12521742 | 3.34151401 | 0.00083323 | 0.08716561 |
| DUSP2       | 42.2352369 | 2.4245817  | 0.7292587  | 3.324721   | 0.00088507 | 0.08955189 |
| HIST2H2AA4  | 692.038642 | 0.58935596 | 0.17731361 | 3.32380563 | 0.00088798 | 0.08955189 |
| PNLIP       | 66.2867316 | 2.32632738 | 0.70385793 | 3.30510928 | 0.00094939 | 0.09306714 |
| RBCK1       | 3810.72786 | 0.41239537 | 0.12487715 | 3.30240848 | 0.00095858 | 0.09331545 |
| FLRT2       | 123.111237 | 1.26407373 | 0.38506298 | 3.2827714  | 0.00102792 | 0.09736068 |
| USP18       | 694.690779 | 0.67865797 | 0.20664187 | 3.28422292 | 0.00102264 | 0.09736068 |
| PRSS2       | 906.618541 | 3.7282296  | 1.14040423 | 3.26921763 | 0.00107845 | 0.09836653 |
| RP4.533D7.6 | 49.8225831 | 2.12823514 | 0.65164895 | 3.26592275 | 0.00109108 | 0.09867588 |
