# Supplementary material
Source: publisher figshare collection journal article supplement (https://diabetesjournals.figshare.com/articles/dataset/_/24615675)
Supplement: Supplementary file 4 [file 2]

**Supplemental Table S4**

|          | baseMean   | log2FoldChan | lfcSE      | stat       | pvalue   | padj     |
|----------|------------|--------------|------------|------------|----------|----------|
| SEZ6L    | 7644.27755 | -1.3828236   | 0.11640023 | -11.879905 | 1.51E-32 | 1.07E-28 |
| KCTD12   | 3507.97434 | -1.6316529   | 0.13893407 | -11.74408  | 7.57E-32 | 3.60E-28 |
| MYO10    | 6864.2791  | -0.7022987   | 0.06482502 | -10.833759 | 2.38E-27 | 8.50E-24 |
| NUDT4    | 6484.36526 | -1.2265587   | 0.11855752 | -10.345684 | 4.38E-25 | 1.25E-21 |
| ADAMTSL2 | 1140.27125 | -1.3847389   | 0.1378143  | -10.047861 | 9.39E-24 | 1.91E-20 |
| C12orf75 | 5018.92541 | -1.4663943   | 0.15599519 | -9.4002529 | 5.44E-21 | 8.63E-18 |
| TMEM45B  | 7614.63966 | -0.7377087   | 0.08110715 | -9.0954826 | 9.42E-20 | 1.34E-16 |
| TSPAN2   | 3747.12343 | -1.1025167   | 0.12193734 | -9.0416658 | 1.54E-19 | 1.84E-16 |
| RAB3B    | 7464.59268 | -0.7971116   | 0.08808473 | -9.0493738 | 1.44E-19 | 1.84E-16 |
| GCH1     | 7205.27655 | -0.899438    | 0.10146493 | -8.8645203 | 7.68E-19 | 8.44E-16 |
| LRRFIP1  | 5840.56956 | -0.5896626   | 0.06666947 | -8.8445675 | 9.19E-19 | 9.37E-16 |
| SLC16A12 | 800.188448 | -1.3111319   | 0.15019661 | -8.7294373 | 2.56E-18 | 2.44E-15 |
| ARFGEF3  | 10985.1505 | -0.5030531   | 0.05838533 | -8.6160883 | 6.93E-18 | 6.18E-15 |
| PLXDC2   | 741.355766 | -1.6410884   | 0.19221625 | -8.5377195 | 1.37E-17 | 1.15E-14 |
| ISL1     | 10481.753  | -0.6551218   | 0.07697062 | -8.5113224 | 1.72E-17 | 1.29E-14 |
| NFASC    | 3401.42046 | -0.5884193   | 0.07055017 | -8.3404373 | 7.40E-17 | 5.28E-14 |
| IDS      | 29752.9962 | -0.6266323   | 0.07647296 | -8.1941678 | 2.52E-16 | 1.64E-13 |
| ECI2     | 1822.46141 | -1.0575491   | 0.1294371  | -8.1703703 | 3.07E-16 | 1.91E-13 |
| PARM1    | 30651.3829 | -0.4723068   | 0.0580031  | -8.1427865 | 3.86E-16 | 2.30E-13 |
| HSPA1A   | 24920.2602 | -0.656521    | 0.08240214 | -7.9672801 | 1.62E-15 | 9.26E-13 |
| EXTL3    | 2140.58656 | -0.6431231   | 0.08217722 | -7.8260513 | 5.03E-15 | 2.66E-12 |
| QDPR     | 7477.64384 | -0.5121402   | 0.06633165 | -7.7209036 | 1.16E-14 | 5.89E-12 |
| TNFRSF21 | 10284.1289 | -0.493673    | 0.06420279 | -7.6892763 | 1.48E-14 | 7.28E-12 |
| SLC30A8  | 29078.7202 | -0.7943871   | 0.10553647 | -7.5271339 | 5.19E-14 | 2.47E-11 |
| PTPRT    | 1794.3405  | -1.3471754   | 0.17970833 | -7.4964552 | 6.56E-14 | 3.02E-11 |
| NPNT     | 11138.5117 | -0.6900398   | 0.09235363 | -7.4717123 | 7.92E-14 | 3.53E-11 |
| CYP4F3   | 211.508051 | -3.7123553   | 0.49905834 | -7.4387202 | 1.02E-13 | 4.40E-11 |
| KCNA5    | 1344.68473 | -1.3645636   | 0.18364965 | -7.4302544 | 1.08E-13 | 4.55E-11 |
| HSPA1B   | 14193.6656 | -0.5457647   | 0.07383593 | -7.3915874 | 1.45E-13 | 5.92E-11 |
| ARHGAP1  | 4486.63396 | -0.5835766   | 0.07959541 | -7.3317866 | 2.27E-13 | 9.00E-11 |
| USH2A    | 330.857357 | -1.4390314   | 0.19899971 | -7.231324  | 4.78E-13 | 1.75E-10 |
| TMEM59   | 38472.8074 | -0.3875062   | 0.05357487 | -7.2329842 | 4.72E-13 | 1.75E-10 |
| CAMK2G   | 641.037332 | -1.779354    | 0.24720806 | -7.1977995 | 6.12E-13 | 2.18E-10 |
| ADCY2    | 1572.9232  | -1.5377715   | 0.21607437 | -7.1168622 | 1.10E-12 | 3.75E-10 |
| GLT8D2   | 341.524346 | -1.7682689   | 0.25144873 | -7.0323238 | 2.03E-12 | 6.74E-10 |
| SSR1     | 10496.3387 | -0.4046996   | 0.05776923 | -7.0054519 | 2.46E-12 | 7.81E-10 |
| SDC2     | 7343.72319 | -0.743344    | 0.10617687 | -7.0009977 | 2.54E-12 | 7.89E-10 |
| PCP4     | 885.091784 | -1.5995948   | 0.23122141 | -6.9180222 | 4.58E-12 | 1.36E-09 |
| CALY     | 1818.98268 | -0.7426859   | 0.10730466 | -6.9212824 | 4.48E-12 | 1.36E-09 |
| DNAJC6   | 1401.64795 | -0.7546321   | 0.10914848 | -6.9138123 | 4.72E-12 | 1.37E-09 |
| GPX4     | 7852.38743 | -0.6756296   | 0.0982124  | -6.8792703 | 6.02E-12 | 1.72E-09 |

|            |            |            |            |            |          |          |
|------------|------------|------------|------------|------------|----------|----------|
| IRF6       | 2879.83711 | -0.5779244 | 0.08410197 | -6.8717106 | 6.34E-12 | 1.78E-09 |
| ATP5G2     | 3571.5987  | -0.7666793 | 0.11172445 | -6.8622336 | 6.78E-12 | 1.86E-09 |
| ENPP4      | 3163.28892 | -0.5880314 | 0.0862672  | -6.816397  | 9.34E-12 | 2.47E-09 |
| SCGN       | 15753.6491 | -0.6934153 | 0.1018988  | -6.8049407 | 1.01E-11 | 2.62E-09 |
| CD164      | 33398.688  | -0.4352363 | 0.06463525 | -6.7337299 | 1.65E-11 | 4.22E-09 |
| NFIC       | 1744.83787 | -0.8459136 | 0.1267167  | -6.6756282 | 2.46E-11 | 6.16E-09 |
| NAAA       | 862.263489 | -0.8382373 | 0.12666427 | -6.6177875 | 3.65E-11 | 8.67E-09 |
| PAK3       | 10007.8606 | -0.5789957 | 0.08756849 | -6.611918  | 3.79E-11 | 8.73E-09 |
| CD14       | 1743.25865 | -0.7373668 | 0.11159816 | -6.6073383 | 3.91E-11 | 8.87E-09 |
| ARF1       | 15678.3174 | -0.717265  | 0.10871537 | -6.5976412 | 4.18E-11 | 9.32E-09 |
| NBEAL2     | 980.680209 | -0.7455446 | 0.11388041 | -6.5467332 | 5.88E-11 | 1.27E-08 |
| KLHDC8A    | 361.938048 | -1.8201612 | 0.27840483 | -6.5378218 | 6.24E-11 | 1.31E-08 |
| GPR119     | 3568.26949 | -0.9134954 | 0.13967259 | -6.5402628 | 6.14E-11 | 1.31E-08 |
| RAB26      | 2100.25211 | -0.8920667 | 0.13806908 | -6.4610172 | 1.04E-10 | 2.12E-08 |
| RFX6       | 5664.50983 | -2.2730907 | 0.3536347  | -6.4277933 | 1.29E-10 | 2.60E-08 |
| MUC13      | 33356.2238 | -0.4733081 | 0.07393529 | -6.4016529 | 1.54E-10 | 3.05E-08 |
| PLCE1      | 3761.47812 | -1.0317084 | 0.16286035 | -6.3349264 | 2.37E-10 | 4.64E-08 |
| SLC5A1     | 2673.88863 | -2.2058982 | 0.35026173 | -6.2978567 | 3.02E-10 | 5.82E-08 |
| CD99       | 33886.0537 | -0.3363469 | 0.05349108 | -6.287905  | 3.22E-10 | 6.12E-08 |
| GPR148     | 125.212034 | -2.6342729 | 0.42165474 | -6.2474643 | 4.17E-10 | 7.84E-08 |
| DSP        | 22652.7292 | -0.4514674 | 0.07256275 | -6.2217518 | 4.92E-10 | 9.11E-08 |
| AF011889.5 | 9341.51987 | -0.6941778 | 0.11254635 | -6.1679276 | 6.92E-10 | 1.25E-07 |
| CTSB       | 45807.6505 | -0.5448483 | 0.08837275 | -6.1653426 | 7.03E-10 | 1.25E-07 |
| FAM84A     | 3536.86562 | -0.5049901 | 0.08190469 | -6.1655827 | 7.02E-10 | 1.25E-07 |
| CXCL1      | 2389.72752 | -1.0088294 | 0.16441897 | -6.135724  | 8.48E-10 | 1.48E-07 |
| EPG5       | 1234.97544 | -1.1769002 | 0.19193159 | -6.1318733 | 8.69E-10 | 1.49E-07 |
| GALNT13    | 1687.91354 | -0.9012351 | 0.14708859 | -6.1271587 | 8.95E-10 | 1.52E-07 |
| NCAM1      | 3665.09763 | -0.5535478 | 0.09045703 | -6.1194562 | 9.39E-10 | 1.58E-07 |
| NOMO2      | 9664.02219 | -0.6340074 | 0.10377935 | -6.1091864 | 1.00E-09 | 1.64E-07 |
| HEPACAM2   | 5331.91828 | -0.6206595 | 0.10277804 | -6.0388338 | 1.55E-09 | 2.49E-07 |
| SLC22A17   | 1818.00899 | -0.66865   | 0.1107743  | -6.0361471 | 1.58E-09 | 2.50E-07 |
| UCN3       | 589.599546 | -1.280674  | 0.21224325 | -6.0339915 | 1.60E-09 | 2.51E-07 |
| RGS9       | 2443.12481 | -0.8618146 | 0.1432694  | -6.0153431 | 1.80E-09 | 2.79E-07 |
| RAPGEF4    | 749.060661 | -1.1036447 | 0.18365428 | -6.0093602 | 1.86E-09 | 2.86E-07 |
| CPSF6      | 4207.69283 | -0.4213748 | 0.07019867 | -6.0026039 | 1.94E-09 | 2.95E-07 |
| SUMF2      | 6286.55775 | -0.5940475 | 0.09939309 | -5.9767483 | 2.28E-09 | 3.42E-07 |
| TGFBR1     | 1391.71392 | -0.5888033 | 0.09873854 | -5.9632575 | 2.47E-09 | 3.68E-07 |
| SSTR2      | 4941.84186 | -0.5060173 | 0.08537293 | -5.9271398 | 3.08E-09 | 4.54E-07 |
| AGT        | 6805.08697 | -0.4356324 | 0.07357521 | -5.9209135 | 3.20E-09 | 4.66E-07 |
| BAMBI      | 1432.59137 | -0.7527618 | 0.12876601 | -5.8459665 | 5.04E-09 | 7.26E-07 |
| PDE4DIP    | 7804.11098 | -0.4219663 | 0.0723746  | -5.8303085 | 5.53E-09 | 7.90E-07 |
| FAM46C     | 2992.70881 | -0.5911875 | 0.10222575 | -5.7831561 | 7.33E-09 | 1.02E-06 |
| FLNB       | 7021.70273 | -0.4505457 | 0.07799712 | -5.7764402 | 7.63E-09 | 1.05E-06 |

|          |            |            |            |            |          |          |
|----------|------------|------------|------------|------------|----------|----------|
| EIF4B    | 4097.97719 | -0.410096  | 0.07108732 | -5.7689045 | 7.98E-09 | 1.08E-06 |
| MGAT4A   | 3254.11871 | -0.5605986 | 0.09749865 | -5.7498095 | 8.93E-09 | 1.19E-06 |
| BTG3     | 2615.83904 | -0.5603569 | 0.09762103 | -5.7401245 | 9.46E-09 | 1.25E-06 |
| MOB1B    | 3399.86149 | -0.563491  | 0.09827869 | -5.733603  | 9.83E-09 | 1.29E-06 |
| REEP4    | 1397.72553 | -0.7608044 | 0.13347184 | -5.7001119 | 1.20E-08 | 1.55E-06 |
| TPST2    | 687.916736 | -1.553819  | 0.27305027 | -5.6905968 | 1.27E-08 | 1.63E-06 |
| DZIP3    | 3111.48527 | -0.4497732 | 0.07928843 | -5.672621  | 1.41E-08 | 1.79E-06 |
| MBOAT2   | 4049.08083 | -0.5557226 | 0.09803309 | -5.668725  | 1.44E-08 | 1.82E-06 |
| FBN1     | 486.643989 | -1.2536817 | 0.22184552 | -5.651147  | 1.59E-08 | 1.98E-06 |
| HSPH1    | 8187.0534  | -0.3747999 | 0.06639952 | -5.6446171 | 1.66E-08 | 2.04E-06 |
| TIAM1    | 1645.15418 | -0.6117165 | 0.10847288 | -5.6393495 | 1.71E-08 | 2.08E-06 |
| LMAN1    | 11183.7155 | -0.3662606 | 0.06515668 | -5.621229  | 1.90E-08 | 2.29E-06 |
| GCNT1    | 2923.35823 | -0.5249364 | 0.09357346 | -5.6098853 | 2.02E-08 | 2.43E-06 |
| PLK2     | 20569.7667 | -0.571959  | 0.10342603 | -5.5301266 | 3.20E-08 | 3.74E-06 |
| ELL2     | 22701.8134 | -0.3495737 | 0.06330467 | -5.5220846 | 3.35E-08 | 3.89E-06 |
| ANKRD36C | 1559.77426 | -0.5272203 | 0.0966388  | -5.4555763 | 4.88E-08 | 5.57E-06 |
| GPX3     | 56201.9835 | -0.4907962 | 0.09032021 | -5.4339576 | 5.51E-08 | 6.19E-06 |
| SIGLEC15 | 119.657158 | -2.8201705 | 0.51928314 | -5.4308917 | 5.61E-08 | 6.25E-06 |
| PEG10    | 13068.2323 | -0.4864841 | 0.08995699 | -5.4079632 | 6.37E-08 | 7.05E-06 |
| PTGER4   | 929.90853  | -1.1614528 | 0.21561279 | -5.3867528 | 7.17E-08 | 7.82E-06 |
| RIMBP2   | 2222.54743 | -0.569416  | 0.10698991 | -5.3221464 | 1.03E-07 | 1.09E-05 |
| MAGED1   | 9785.0303  | -0.358105  | 0.06766608 | -5.2922379 | 1.21E-07 | 1.28E-05 |
| PRSS23   | 2880.69437 | -0.6927732 | 0.13119603 | -5.2804428 | 1.29E-07 | 1.34E-05 |
| CHGA     | 96703.1149 | -0.5274378 | 0.09990409 | -5.2794416 | 1.30E-07 | 1.34E-05 |
| TMX1     | 3445.63042 | -0.4246682 | 0.08043927 | -5.2793645 | 1.30E-07 | 1.34E-05 |
| BAIAP3   | 941.762805 | -1.3436756 | 0.25529969 | -5.2631305 | 1.42E-07 | 1.45E-05 |
| PELI3    | 1162.61477 | -0.8010574 | 0.15286222 | -5.2403881 | 1.60E-07 | 1.63E-05 |
| DHRS2    | 1788.32554 | -0.7836816 | 0.14977064 | -5.2325451 | 1.67E-07 | 1.68E-05 |
| MLXIPL   | 756.953957 | -0.692047  | 0.13242906 | -5.2257938 | 1.73E-07 | 1.73E-05 |
| KCNMA1   | 7331.17234 | -0.3789887 | 0.07271947 | -5.211654  | 1.87E-07 | 1.84E-05 |
| ASXL3    | 1276.539   | -0.8023736 | 0.15521489 | -5.1694369 | 2.35E-07 | 2.28E-05 |
| LDB2     | 353.751564 | -2.1619397 | 0.41933481 | -5.155641  | 2.53E-07 | 2.44E-05 |
| NOMO1    | 12368.7438 | -0.6170885 | 0.11991443 | -5.1460739 | 2.66E-07 | 2.53E-05 |
| NTRK2    | 694.681026 | -0.8855201 | 0.17332851 | -5.1089123 | 3.24E-07 | 3.04E-05 |
| KLHL41   | 2530.99262 | -0.7482296 | 0.14745643 | -5.0742422 | 3.89E-07 | 3.61E-05 |
| HIPK2    | 4221.5464  | -0.3277314 | 0.06503312 | -5.0394536 | 4.67E-07 | 4.30E-05 |
| SCARB2   | 35609.5244 | -0.3363431 | 0.06690045 | -5.0275164 | 4.97E-07 | 4.55E-05 |
| SLC25A53 | 1203.03566 | -0.6798824 | 0.13758098 | -4.941689  | 7.74E-07 | 6.82E-05 |
| IVNS1ABP | 7258.83201 | -0.3635434 | 0.07370079 | -4.9326936 | 8.11E-07 | 7.10E-05 |
| ETFDH    | 3136.49832 | -0.3706986 | 0.07524104 | -4.926814  | 8.36E-07 | 7.27E-05 |
| SLC14A1  | 77.5246003 | -4.6568285 | 0.95180907 | -4.8926078 | 9.95E-07 | 8.40E-05 |
| CDCP1    | 3428.72555 | -0.3689773 | 0.07546646 | -4.8892886 | 1.01E-06 | 8.50E-05 |
| DCK      | 1811.94579 | -0.5298065 | 0.1086861  | -4.8746481 | 1.09E-06 | 9.10E-05 |

|          |            |            |            |            |          |            |
|----------|------------|------------|------------|------------|----------|------------|
| BAG3     | 1872.50061 | -0.4533542 | 0.09304026 | -4.8726674 | 1.10E-06 | 9.12E-05   |
| PAM      | 52998.1058 | -0.3489341 | 0.07162205 | -4.8718811 | 1.11E-06 | 9.12E-05   |
| LMBRD1   | 4067.19052 | -0.4314967 | 0.08860814 | -4.8697185 | 1.12E-06 | 9.17E-05   |
| PTPRN    | 58857.1752 | -0.3666364 | 0.07557674 | -4.85118   | 1.23E-06 | 0.00010011 |
| WFS1     | 7769.3729  | -0.3135666 | 0.0649172  | -4.8302547 | 1.36E-06 | 0.00010997 |
| APLP2    | 15890.2423 | -0.2545924 | 0.0528916  | -4.8134743 | 1.48E-06 | 0.00011895 |
| MAP1A    | 2029.48895 | -0.8227212 | 0.17138682 | -4.800376  | 1.58E-06 | 0.00012629 |
| NOMO3    | 3348.70833 | -0.5030238 | 0.1048603  | -4.7970851 | 1.61E-06 | 0.00012696 |
| OPN3     | 2102.69654 | -0.4626029 | 0.09641311 | -4.7981325 | 1.60E-06 | 0.00012696 |
| CACNA2D2 | 759.014369 | -0.6793685 | 0.14187535 | -4.7884887 | 1.68E-06 | 0.00013036 |
| SORT1    | 9099.51842 | -0.4585399 | 0.09574621 | -4.7891175 | 1.68E-06 | 0.00013036 |
| C21orf58 | 552.020457 | -1.0761476 | 0.22494705 | -4.7840042 | 1.72E-06 | 0.00013258 |
| RPL3     | 20168.1391 | -0.2518301 | 0.05310095 | -4.7424772 | 2.11E-06 | 0.00016202 |
| FXYD5    | 5612.13666 | -0.6056053 | 0.12798142 | -4.7319782 | 2.22E-06 | 0.00016972 |
| ABCG2    | 813.741948 | -0.8152398 | 0.17261501 | -4.7228788 | 2.33E-06 | 0.00017655 |
| TGOLN2   | 10741.9961 | -0.3145699 | 0.06662959 | -4.7211743 | 2.34E-06 | 0.00017709 |
| SPTAN1   | 3509.93954 | -0.4083111 | 0.08672384 | -4.7081761 | 2.50E-06 | 0.00018582 |
| RBP4     | 2900.47491 | -0.5664688 | 0.12075604 | -4.6910184 | 2.72E-06 | 0.00019697 |
| CCNY     | 2443.84348 | -0.5225661 | 0.11133902 | -4.6934678 | 2.69E-06 | 0.00019697 |
| USP38    | 2490.37936 | -0.4739155 | 0.10102457 | -4.6910915 | 2.72E-06 | 0.00019697 |
| TMEM200A | 4865.84147 | -0.5250011 | 0.11254808 | -4.664683  | 3.09E-06 | 0.00022171 |
| EFR3A    | 4961.51952 | -0.4010859 | 0.08703159 | -4.6085094 | 4.06E-06 | 0.00028378 |
| TMED3    | 9429.72675 | -0.3153356 | 0.06844052 | -4.6074402 | 4.08E-06 | 0.00028385 |
| ITGB8    | 1627.27793 | -0.5825385 | 0.1265378  | -4.6036721 | 4.15E-06 | 0.00028763 |
| F13A1    | 62.2685373 | -4.3812421 | 0.95227036 | -4.6008384 | 4.21E-06 | 0.00029017 |
| KMO      | 537.218278 | -0.8427485 | 0.1835215  | -4.592097  | 4.39E-06 | 0.00029903 |
| RNASET2  | 603.261425 | -0.7238188 | 0.15791278 | -4.5836623 | 4.57E-06 | 0.00030619 |
| STAT4    | 1127.56272 | -0.6613115 | 0.14446947 | -4.5775169 | 4.71E-06 | 0.00031385 |
| MAFB     | 7472.22279 | -0.3947918 | 0.08714667 | -4.5302001 | 5.89E-06 | 0.00038408 |
| DNAJB1   | 10536.9718 | -0.4767447 | 0.10548463 | -4.5195657 | 6.20E-06 | 0.00039666 |
| NUCB2    | 7338.16402 | -0.267283  | 0.05913919 | -4.519558  | 6.20E-06 | 0.00039666 |
| CTNND2   | 1576.93169 | -0.6151525 | 0.13638207 | -4.5105087 | 6.47E-06 | 0.00041211 |
| GYG2     | 406.605773 | -1.102718  | 0.24534468 | -4.4945665 | 6.97E-06 | 0.00043643 |
| CREB3L2  | 2312.00646 | -0.5245155 | 0.1171826  | -4.4760527 | 7.60E-06 | 0.00047188 |
| KCTD3    | 2595.59547 | -0.4220875 | 0.0944578  | -4.4685293 | 7.88E-06 | 0.00048667 |
| SEC24D   | 8183.6631  | -0.4039407 | 0.09052923 | -4.4619917 | 8.12E-06 | 0.0004996  |
| GCLM     | 4139.16257 | -0.4903727 | 0.11004789 | -4.4559938 | 8.35E-06 | 0.00050938 |
| PRDX4    | 9487.2624  | -0.37506   | 0.08415465 | -4.4567948 | 8.32E-06 | 0.00050938 |
| DAZAP2   | 5982.22851 | -0.3287583 | 0.07393871 | -4.4463629 | 8.73E-06 | 0.00052601 |
| IGFBPL1  | 792.288726 | -0.635351  | 0.14311812 | -4.4393473 | 9.02E-06 | 0.00054117 |
| HOMER2   | 684.864323 | -0.6823572 | 0.15394139 | -4.4325777 | 9.31E-06 | 0.00055149 |
| SCG3     | 13184.4506 | -0.2908491 | 0.06560486 | -4.4333461 | 9.28E-06 | 0.00055149 |
| ADAMTS2  | 876.846795 | -1.1064768 | 0.25102454 | -4.4078432 | 1.04E-05 | 0.00061077 |

|          |            |            |            |            |          |            |
|----------|------------|------------|------------|------------|----------|------------|
| C22orf42 | 148.000798 | -2.2637788 | 0.51390574 | -4.4050468 | 1.06E-05 | 0.00061618 |
| ENPP1    | 3471.52607 | -0.4648742 | 0.10571486 | -4.397435  | 1.10E-05 | 0.00063559 |
| FAM46A   | 11991.2281 | -0.2952345 | 0.0671945  | -4.393731  | 1.11E-05 | 0.0006413  |
| TMED10   | 17090.7387 | -0.2342315 | 0.05345636 | -4.3817331 | 1.18E-05 | 0.00066956 |
| DSCAML1  | 704.655031 | -0.6424417 | 0.14744213 | -4.3572467 | 1.32E-05 | 0.00074309 |
| SLC22A4  | 761.153734 | -0.8009631 | 0.1840082  | -4.352866  | 1.34E-05 | 0.00075215 |
| USP37    | 973.685185 | -0.565916  | 0.12999137 | -4.3534886 | 1.34E-05 | 0.00075215 |
| CTSO     | 983.010559 | -0.6998515 | 0.16087943 | -4.3501617 | 1.36E-05 | 0.00075851 |
| ALDH1A1  | 42475.1268 | -1.9366707 | 0.44576122 | -4.3446369 | 1.40E-05 | 0.00077389 |
| PRKCE    | 1106.08088 | -0.7528223 | 0.17329957 | -4.3440517 | 1.40E-05 | 0.00077389 |
| ELOVL4   | 1020.41234 | -0.5080317 | 0.1172698  | -4.3321612 | 1.48E-05 | 0.00081061 |
| RNASE4   | 872.113524 | -0.7257687 | 0.16769363 | -4.3279444 | 1.51E-05 | 0.00082036 |
| MATN2    | 894.901937 | -0.6037089 | 0.13949418 | -4.3278432 | 1.51E-05 | 0.00082036 |
| CSRNP3   | 1003.59845 | -0.5687055 | 0.13144699 | -4.326501  | 1.51E-05 | 0.00082223 |
| CACNA1A  | 871.130167 | -0.6904711 | 0.15974585 | -4.3223097 | 1.54E-05 | 0.00083169 |
| CAPN2    | 5919.05962 | -0.4371445 | 0.10118235 | -4.3203634 | 1.56E-05 | 0.0008359  |
| ANGPTL4  | 1302.15026 | -0.8490845 | 0.19685932 | -4.3131538 | 1.61E-05 | 0.0008572  |
| LGI3     | 181.219396 | -1.5115816 | 0.35122263 | -4.3037706 | 1.68E-05 | 0.00088819 |
| CPE      | 154141.623 | -0.2360435 | 0.05484724 | -4.3036525 | 1.68E-05 | 0.00088819 |
| CXorf57  | 1727.03068 | -0.518647  | 0.12074622 | -4.2953476 | 1.74E-05 | 0.0009187  |
| FGF14    | 1448.60345 | -0.508669  | 0.11875152 | -4.2834737 | 1.84E-05 | 0.00096558 |
| PVR      | 6131.84545 | -0.2579264 | 0.06028949 | -4.2781316 | 1.88E-05 | 0.00098183 |
| METTL9   | 2984.15315 | -0.3105067 | 0.0728877  | -4.2600692 | 2.04E-05 | 0.00106076 |
| SGMS2    | 4060.5463  | -0.4338652 | 0.10227383 | -4.2421922 | 2.21E-05 | 0.00114475 |
| CD320    | 2200.60714 | -0.4468108 | 0.10563828 | -4.2296298 | 2.34E-05 | 0.00120621 |
| SRRM2    | 12328.9091 | -0.2981001 | 0.07049823 | -4.2284765 | 2.35E-05 | 0.00120805 |
| TTC3     | 8885.83859 | -0.2354866 | 0.05583831 | -4.2172939 | 2.47E-05 | 0.00126045 |
| MAN1A1   | 20038.1634 | -0.3336785 | 0.07916338 | -4.2150607 | 2.50E-05 | 0.00126846 |
| MACF1    | 10033.58   | -0.2903602 | 0.06893218 | -4.2122594 | 2.53E-05 | 0.00127975 |
| TUBA1A   | 46845.0807 | -0.3944382 | 0.0941248  | -4.1905872 | 2.78E-05 | 0.00139842 |
| SUN1     | 7728.75843 | -0.4851972 | 0.11591699 | -4.1857297 | 2.84E-05 | 0.00142365 |
| CDH10    | 2459.11421 | -0.3643231 | 0.08707303 | -4.1841098 | 2.86E-05 | 0.00142883 |
| EPHX2    | 1373.38956 | -0.4563083 | 0.10938658 | -4.1715202 | 3.03E-05 | 0.00150486 |
| HIP1R    | 2436.71397 | -0.4924256 | 0.11886622 | -4.1426871 | 3.43E-05 | 0.00168374 |
| NT5DC3   | 719.687768 | -0.7641641 | 0.18479747 | -4.1351437 | 3.55E-05 | 0.00172814 |
| MDH2     | 12967.9927 | -0.2817341 | 0.06839883 | -4.1189901 | 3.81E-05 | 0.00182888 |
| CNPY2    | 4976.65641 | -0.4989164 | 0.12116713 | -4.1175889 | 3.83E-05 | 0.00183386 |
| SYTL2    | 268.947076 | -1.4669661 | 0.35721096 | -4.106722  | 4.01E-05 | 0.00190945 |
| EPPK1    | 318.479968 | -0.9845937 | 0.24046543 | -4.0945332 | 4.23E-05 | 0.0019928  |
| UCP2     | 1113.48707 | -0.9726186 | 0.23863405 | -4.0757744 | 4.59E-05 | 0.0021393  |
| CYS1     | 18.866928  | -4.7215157 | 1.16068785 | -4.06786   | 4.74E-05 | 0.00220605 |
| ZBTB41   | 1886.16953 | -0.4631679 | 0.11421009 | -4.0554025 | 5.00E-05 | 0.0022897  |
| CBFB     | 2927.55272 | -0.3653684 | 0.09042588 | -4.040529  | 5.33E-05 | 0.00242434 |

|              |            |            |            |            |            |            |
|--------------|------------|------------|------------|------------|------------|------------|
| TMEM132D     | 1041.05741 | -0.5911101 | 0.14638893 | -4.0379422 | 5.39E-05   | 0.00243571 |
| PTPRN2       | 10398.5504 | -0.3779385 | 0.09387744 | -4.0258707 | 5.68E-05   | 0.00255603 |
| HLTF         | 2299.46002 | -0.4014572 | 0.0998001  | -4.0226128 | 5.76E-05   | 0.00258351 |
| EIF4EBP2     | 1979.74859 | -0.4502187 | 0.11204468 | -4.0182064 | 5.86E-05   | 0.00260768 |
| HSPA8        | 49863.3665 | -0.214474  | 0.05340859 | -4.0157214 | 5.93E-05   | 0.002619   |
| RGPD6        | 1970.35568 | -0.5244644 | 0.13071103 | -4.0123956 | 6.01E-05   | 0.00264799 |
| JAK2         | 760.051478 | -0.6135609 | 0.15340173 | -3.9997    | 6.34E-05   | 0.00277699 |
| SNED1        | 877.51864  | -0.61305   | 0.15337152 | -3.9971569 | 6.41E-05   | 0.00279839 |
| CAPN6        | 87.2686305 | -2.7286015 | 0.68347473 | -3.9922494 | 6.54E-05   | 0.00283959 |
| RP13.58209.6 | 38.0529476 | -4.1934629 | 1.05228058 | -3.9851186 | 6.74E-05   | 0.00291737 |
| USO1         | 4618.83667 | -0.2782113 | 0.07003838 | -3.97227   | 7.12E-05   | 0.00305159 |
| PHKA1        | 779.706782 | -0.6810407 | 0.17152572 | -3.9704872 | 7.17E-05   | 0.00305616 |
| MACC1        | 757.441945 | -0.6219717 | 0.15663978 | -3.9707135 | 7.17E-05   | 0.00305616 |
| ARHGEF9      | 966.147324 | -0.6457525 | 0.16268803 | -3.9692686 | 7.21E-05   | 0.00306269 |
| MYO5B        | 3058.9687  | -0.353842  | 0.08932799 | -3.961155  | 7.46E-05   | 0.00314062 |
| IRF2         | 719.659562 | -0.6693513 | 0.16926285 | -3.954508  | 7.67E-05   | 0.00321972 |
| EXPH5        | 2845.93776 | -0.4279972 | 0.10835441 | -3.9499754 | 7.82E-05   | 0.00326212 |
| NCALD        | 2208.26551 | -0.4757431 | 0.12050035 | -3.9480641 | 7.88E-05   | 0.00327868 |
| MMRN1        | 1335.4287  | -1.8571173 | 0.47206994 | -3.9339876 | 8.35E-05   | 0.00346676 |
| LDHA         | 21124.2253 | -0.3353096 | 0.08542411 | -3.9252337 | 8.66E-05   | 0.00358318 |
| HIST1H2BC    | 825.865971 | -0.5908382 | 0.15118226 | -3.9081186 | 9.30E-05   | 0.00381533 |
| PDE8A        | 1613.62649 | -0.3856255 | 0.09893345 | -3.8978275 | 9.71E-05   | 0.00395837 |
| LRRTM2       | 600.472432 | -0.6292443 | 0.16150278 | -3.8961824 | 9.77E-05   | 0.00397398 |
| ALDH2        | 1770.44707 | -0.6038861 | 0.15507781 | -3.8940849 | 9.86E-05   | 0.00398581 |
| THUMPD1      | 1515.84528 | -0.4288599 | 0.11026932 | -3.8892043 | 0.00010057 | 0.00405533 |
| SYT4         | 12753.1298 | -0.2761284 | 0.07106556 | -3.8855453 | 0.0001021  | 0.00409377 |
| PCSK1        | 5371.41235 | -0.571566  | 0.14720649 | -3.88275   | 0.00010328 | 0.00412953 |
| CTSE         | 130.464325 | -2.1212873 | 0.54773204 | -3.8728559 | 0.00010757 | 0.00427683 |
| C15orf48     | 1058.16064 | -0.8635119 | 0.22300383 | -3.8721841 | 0.00010786 | 0.00427683 |
| FOXP2        | 1117.88785 | -0.5997698 | 0.15492959 | -3.8712411 | 0.00010828 | 0.00427722 |
| RCAN3        | 2423.29567 | -0.395146  | 0.10221002 | -3.8660206 | 0.00011063 | 0.0043381  |
| IFNB1        | 41.4889923 | -3.4313434 | 0.89034541 | -3.8539464 | 0.00011623 | 0.0045083  |
| SEL1L3       | 3074.11949 | -0.3342282 | 0.08669591 | -3.855178  | 0.00011565 | 0.0045083  |
| EPCAM        | 24968.4571 | -0.178206  | 0.04631078 | -3.8480459 | 0.00011906 | 0.00459329 |
| CADPS        | 4903.40102 | -0.2583034 | 0.0672492  | -3.8409889 | 0.00012254 | 0.00471464 |
| ZNF618       | 997.372431 | -0.4986497 | 0.12986448 | -3.8397701 | 0.00012315 | 0.00472537 |
| ALDH4A1      | 94.5354544 | -1.3918796 | 0.36547397 | -3.8084233 | 0.00013986 | 0.00535201 |
| FEV          | 1458.27687 | -0.5977158 | 0.15704589 | -3.8059948 | 0.00014124 | 0.00539036 |
| CACNA1C      | 1476.04562 | -0.4032809 | 0.10606226 | -3.8023036 | 0.00014336 | 0.00544222 |
| ATRAID       | 7775.10163 | -0.2458628 | 0.06465808 | -3.8025069 | 0.00014324 | 0.00544222 |
| SMPDL3B      | 869.573421 | -0.5527082 | 0.14565657 | -3.7945985 | 0.00014788 | 0.00558433 |
| FKBP2        | 5105.0469  | -0.3074399 | 0.08108113 | -3.791757  | 0.00014959 | 0.0056319  |
| SPINT2       | 33703.1474 | -0.2049266 | 0.05415305 | -3.7842117 | 0.0001542  | 0.00576178 |

|             |            |            |            |            |            |            |
|-------------|------------|------------|------------|------------|------------|------------|
| DERL1       | 4094.32531 | -0.2963051 | 0.07869635 | -3.765169  | 0.00016644 | 0.00620291 |
| ADGRG2      | 1166.18405 | -0.7510286 | 0.19955109 | -3.7635904 | 0.00016749 | 0.00622596 |
| FOLR1       | 23.6767551 | -4.5815776 | 1.2175733  | -3.7628762 | 0.00016797 | 0.00622756 |
| EYS         | 530.692174 | -0.969704  | 0.25797446 | -3.7589147 | 0.00017065 | 0.00631059 |
| VIM         | 21970.1171 | -1.2449465 | 0.33165089 | -3.7537859 | 0.00017418 | 0.00642454 |
| TBC1D23     | 2214.29802 | -0.34483   | 0.09199591 | -3.7483192 | 0.00017802 | 0.00654925 |
| RFX3        | 906.135141 | -0.4848129 | 0.12945705 | -3.744971  | 0.00018042 | 0.00662015 |
| NRCAM       | 4316.57648 | -0.4162354 | 0.11123651 | -3.7418956 | 0.00018264 | 0.00668453 |
| RPS2        | 13501.537  | -0.3380679 | 0.09048547 | -3.7361563 | 0.00018686 | 0.00682139 |
| FAM114A1    | 835.499007 | -0.5478581 | 0.14674205 | -3.7334772 | 0.00018885 | 0.0068768  |
| PDIA5       | 338.120404 | -1.0729826 | 0.28752995 | -3.7317247 | 0.00019017 | 0.00690721 |
| NDUFA7      | 1548.30225 | -0.4877459 | 0.13095528 | -3.7245228 | 0.00019569 | 0.00705356 |
| GOLM1       | 5551.29165 | -0.2396268 | 0.06433024 | -3.7249476 | 0.00019536 | 0.00705356 |
| ANKHD1.EIF4 | 456.584075 | -0.6677185 | 0.17936619 | -3.7226556 | 0.00019714 | 0.00708804 |
| RAP1GAP2    | 2095.55451 | -0.4198714 | 0.11282833 | -3.7213293 | 0.00019818 | 0.00708966 |
| SLC7A8      | 4197.69748 | -0.3559081 | 0.09563438 | -3.7215499 | 0.000198   | 0.00708966 |
| NPTX2       | 1158.54882 | -0.7895637 | 0.2134838  | -3.6984713 | 0.0002169  | 0.00770164 |
| FRK         | 1182.13669 | -0.4413345 | 0.11932165 | -3.6986963 | 0.00021671 | 0.00770164 |
| KAT6B       | 1639.49793 | -0.3707574 | 0.1008127  | -3.6776852 | 0.00023536 | 0.00831567 |
| ALDOB       | 122.857969 | -2.4303694 | 0.66150922 | -3.6739766 | 0.00023881 | 0.00841654 |
| SEPHS1      | 1694.67653 | -0.3778123 | 0.10306711 | -3.6656925 | 0.00024667 | 0.00863726 |
| ITGAV       | 7501.57682 | -0.3329031 | 0.09086427 | -3.6637404 | 0.00024856 | 0.00867464 |
| SMARCA2     | 8963.53422 | -0.2225915 | 0.06089188 | -3.6555202 | 0.00025666 | 0.00891382 |
| GIT1        | 2200.67818 | -0.3745367 | 0.10250447 | -3.6538568 | 0.00025833 | 0.00895002 |
| GLUL        | 11139.8881 | -0.4102722 | 0.11257382 | -3.6444727 | 0.00026794 | 0.00923813 |
| ACLY        | 10787.0861 | -0.3688295 | 0.10143228 | -3.6362142 | 0.00027667 | 0.00951626 |
| CDH2        | 356.67488  | -0.7356971 | 0.20276938 | -3.6282458 | 0.00028535 | 0.00972109 |
| TANC2       | 1319.77635 | -0.3869286 | 0.10698721 | -3.6165876 | 0.00029851 | 0.01012106 |
| F3          | 665.617155 | -0.9376475 | 0.25941651 | -3.614448  | 0.00030099 | 0.01018082 |
| RFX5        | 1221.8222  | -0.6497439 | 0.17984879 | -3.6127231 | 0.000303   | 0.01019893 |
| LPCAT1      | 2563.61842 | -0.344928  | 0.095491   | -3.6121515 | 0.00030367 | 0.01019893 |
| NECAB2      | 320.535712 | -0.8557496 | 0.23713806 | -3.6086559 | 0.00030779 | 0.0102889  |
| TMEM64      | 1288.69312 | -0.4427953 | 0.12274091 | -3.6075606 | 0.00030909 | 0.01030828 |
| TUBA1B      | 35532.8408 | -0.2176259 | 0.06038702 | -3.6038515 | 0.00031354 | 0.01041414 |
| P4HTM       | 10586.5824 | -0.2321421 | 0.06448346 | -3.6000251 | 0.00031819 | 0.01051341 |
| SERPINB1    | 4293.56898 | -0.2616013 | 0.07272275 | -3.5972415 | 0.00032161 | 0.01060199 |
| SHROOM3     | 1200.0696  | -0.4760295 | 0.13235826 | -3.596523  | 0.0003225  | 0.0106068  |
| FOXN3       | 1181.92465 | -0.6992139 | 0.19524286 | -3.5812523 | 0.00034195 | 0.01118625 |
| CLCN4       | 1253.44871 | -0.3970571 | 0.11110663 | -3.5736582 | 0.00035203 | 0.01147227 |
| PANX1       | 2597.24799 | -0.4115988 | 0.11539438 | -3.5668873 | 0.00036125 | 0.01166615 |
| TMEM132B    | 376.661815 | -0.8866182 | 0.24994667 | -3.5472294 | 0.00038931 | 0.01245952 |
| VWA5A       | 12591.9224 | -0.2313459 | 0.06521208 | -3.5475922 | 0.00038877 | 0.01245952 |
| UGGT1       | 2588.21404 | -0.4227586 | 0.12008684 | -3.5204411 | 0.00043083 | 0.01357585 |

|             |            |            |            |            |            |            |
|-------------|------------|------------|------------|------------|------------|------------|
| F2          | 55.1802513 | -1.8347894 | 0.52311602 | -3.5074234 | 0.00045247 | 0.01413246 |
| NDFIP1      | 7230.58801 | -0.2422131 | 0.06904504 | -3.5080445 | 0.00045141 | 0.01413246 |
| ANKRD37     | 515.295441 | -0.650149  | 0.18644787 | -3.4870283 | 0.00048842 | 0.0151222  |
| CLINT1      | 2855.40159 | -0.27445   | 0.07871875 | -3.4864629 | 0.00048945 | 0.0151222  |
| TECR        | 5856.92894 | -0.302392  | 0.08677877 | -3.4846317 | 0.00049282 | 0.01519317 |
| HINT3       | 1123.17606 | -0.4973807 | 0.14283485 | -3.4822081 | 0.0004973  | 0.01526542 |
| SLC29A1     | 4256.22143 | -0.3655541 | 0.10502298 | -3.4807063 | 0.00050009 | 0.01531832 |
| COBL        | 507.203117 | -0.6413231 | 0.18462566 | -3.47364   | 0.00051345 | 0.01569374 |
| C21orf91    | 264.513928 | -0.7210912 | 0.20777877 | -3.4704756 | 0.00051954 | 0.01577847 |
| NET1        | 2135.7377  | -0.2899988 | 0.08363576 | -3.4674026 | 0.00052551 | 0.01592609 |
| YIPF2       | 2189.75617 | -0.3004902 | 0.08667837 | -3.4667262 | 0.00052684 | 0.01593239 |
| S100A10     | 2311.8771  | -0.40414   | 0.11668122 | -3.463625  | 0.00053295 | 0.01608312 |
| UBE2J1      | 2851.36476 | -0.3248244 | 0.09384696 | -3.4612137 | 0.00053775 | 0.01618581 |
| APCDD1L     | 951.500819 | -0.742147  | 0.21465907 | -3.4573291 | 0.00054556 | 0.01635756 |
| CACNB2      | 1507.15768 | -0.3724356 | 0.10773995 | -3.4568016 | 0.00054663 | 0.01635756 |
| C2orf70     | 68.9325126 | -2.2994954 | 0.66588926 | -3.4532699 | 0.00055384 | 0.01653857 |
| DDX24       | 8326.94511 | -0.2152679 | 0.06244107 | -3.4475377 | 0.00056572 | 0.01685826 |
| KIF19       | 848.139508 | -0.5872527 | 0.17114739 | -3.4312689 | 0.00060077 | 0.01770053 |
| PDE8B       | 464.694493 | -0.54763   | 0.15961374 | -3.4309704 | 0.00060143 | 0.01770053 |
| ALDH7A1     | 639.488688 | -0.5047589 | 0.14722846 | -3.428406  | 0.00060714 | 0.01783183 |
| KDELC2      | 443.671442 | -0.7793624 | 0.22751742 | -3.4255065 | 0.00061365 | 0.01786837 |
| TUSC3       | 16415.5782 | -0.1911911 | 0.05580974 | -3.4257666 | 0.00061307 | 0.01786837 |
| LAPTM4A     | 14257.9383 | -0.234494  | 0.06847682 | -3.4244287 | 0.00061609 | 0.01787423 |
| SERPINA5    | 216.675845 | -1.775008  | 0.51860621 | -3.4226508 | 0.00062014 | 0.01795504 |
| TIPARP      | 1353.28688 | -0.4316212 | 0.12621794 | -3.4196499 | 0.00062702 | 0.01811751 |
| PGRMC1      | 3180.30961 | -0.2497701 | 0.07319854 | -3.4122285 | 0.00064434 | 0.01850567 |
| GRK3        | 2194.78453 | -0.4045098 | 0.11857431 | -3.4114456 | 0.00064619 | 0.01852163 |
| RP11.190A12 | 13.8548811 | -6.1717541 | 1.81344978 | -3.4033223 | 0.00066572 | 0.01892917 |
| GRSF1       | 6692.95046 | -0.2277804 | 0.06692696 | -3.403418  | 0.00066548 | 0.01892917 |
| CXCL5       | 358.910049 | -1.0860478 | 0.31941391 | -3.4001267 | 0.00067355 | 0.01907579 |
| HEXB        | 11549.5273 | -0.1908223 | 0.05619831 | -3.3955166 | 0.00068499 | 0.01929608 |
| CYP4V2      | 1920.04341 | -0.3121783 | 0.09204742 | -3.3914943 | 0.00069513 | 0.01949358 |
| TTLL6       | 125.020154 | -1.3876524 | 0.40930527 | -3.3902628 | 0.00069826 | 0.01954297 |
| SMOC1       | 4550.28913 | -0.433061  | 0.12782341 | -3.3879633 | 0.00070414 | 0.01966898 |
| PEMT        | 14382.0226 | -0.2888312 | 0.08534905 | -3.3841169 | 0.00071408 | 0.01986885 |
| ITGB1       | 30096.9592 | -0.2565224 | 0.07581951 | -3.3833301 | 0.00071613 | 0.0198871  |
| TMEM98      | 492.023706 | -0.8418334 | 0.24947895 | -3.3743663 | 0.00073986 | 0.02046655 |
| PAPPA2      | 2811.20239 | -0.3222453 | 0.09557079 | -3.3717971 | 0.00074679 | 0.02061846 |
| C8B         | 417.1247   | -0.7612006 | 0.22614234 | -3.3660241 | 0.0007626  | 0.02097372 |
| SLC24A3     | 81.3979352 | -1.6819901 | 0.50043393 | -3.3610632 | 0.00077643 | 0.02131302 |
| FABP5       | 6726.10261 | -0.3619729 | 0.10784917 | -3.3562881 | 0.00078996 | 0.02164284 |
| BTG2        | 5505.85822 | -0.3940701 | 0.11792279 | -3.3417633 | 0.00083248 | 0.02276403 |
| SND1        | 6985.49933 | -0.2039515 | 0.06107761 | -3.3392183 | 0.00084015 | 0.02284234 |



|           |            |            |            |            |            |            |
|-----------|------------|------------|------------|------------|------------|------------|
| CDH1      | 19030.7798 | -0.1676897 | 0.05025954 | -3.3364745 | 0.00084848 | 0.02302516 |
| MFSD6     | 5271.19927 | -0.2171283 | 0.06511939 | -3.3343115 | 0.00085511 | 0.02316095 |
| LGALS4    | 44.5919623 | -2.7018522 | 0.81077429 | -3.3324345 | 0.0008609  | 0.02320199 |
| FGF18     | 87.1152665 | -1.8264847 | 0.54806771 | -3.3325896 | 0.00086042 | 0.02320199 |
| CITED4    | 185.28325  | -0.8231849 | 0.24703653 | -3.3322397 | 0.0008615  | 0.02320199 |
| MAGI1     | 1149.50959 | -0.3983195 | 0.11977463 | -3.3255745 | 0.00088237 | 0.02371917 |
| HTR1F     | 599.839423 | -0.5112737 | 0.15400398 | -3.3198736 | 0.00090058 | 0.02408785 |
| IL1R2     | 88.6493767 | -1.3217859 | 0.39860256 | -3.3160497 | 0.000913   | 0.02434915 |
| KIAA1549L | 614.101724 | -0.6490361 | 0.19658134 | -3.3016158 | 0.0009613  | 0.02545741 |
| ALDH1B1   | 1127.09775 | -0.5023934 | 0.15227471 | -3.2992568 | 0.00096941 | 0.02560795 |
| MGST3     | 1998.92449 | -0.4362966 | 0.13242507 | -3.2946676 | 0.00098538 | 0.02595081 |
| TGFB3     | 95.0719153 | -1.6367889 | 0.49739012 | -3.2907548 | 0.00099919 | 0.02626599 |
| RNF170    | 655.867213 | -0.5286186 | 0.1607134  | -3.2892006 | 0.00100472 | 0.02636292 |
| WDFY2     | 1182.75624 | -0.3596856 | 0.10944178 | -3.2865472 | 0.00101424 | 0.02656372 |
| FAM163A   | 386.911634 | -0.8679389 | 0.26489538 | -3.2765345 | 0.0010509  | 0.02737312 |
| ABCB10    | 1354.45465 | -0.4837923 | 0.14768725 | -3.2757892 | 0.00105367 | 0.02739547 |
| TVP23B    | 4445.1035  | -0.2728015 | 0.08336486 | -3.2723801 | 0.00106646 | 0.02762734 |
| SYDE2     | 1063.54049 | -0.4673519 | 0.14305401 | -3.2669612 | 0.00108709 | 0.02803307 |
| MRGBP     | 723.545238 | -0.5112544 | 0.15659978 | -3.26472   | 0.00109572 | 0.02813014 |
| ATP13A2   | 2379.2296  | -0.3822022 | 0.1171748  | -3.2618128 | 0.00110702 | 0.02830186 |
| RBM3      | 1490.10127 | -0.3039147 | 0.09318333 | -3.2614702 | 0.00110836 | 0.02830186 |
| SNX33     | 267.899653 | -0.8797239 | 0.26986201 | -3.2599029 | 0.0011145  | 0.02835946 |
| CRTAC1    | 996.936591 | -0.5705737 | 0.175029   | -3.2598809 | 0.00111459 | 0.02835946 |
| GNG2      | 3734.24237 | -0.294324  | 0.09032775 | -3.2584011 | 0.00112042 | 0.02845705 |
| TMBIM6    | 63479.0202 | -0.1373559 | 0.04218663 | -3.25591   | 0.0011303  | 0.0286061  |
| XRCC6     | 13313.596  | -0.2127293 | 0.06547135 | -3.249197  | 0.00115731 | 0.02918637 |
| USP25     | 3744.33726 | -0.2996306 | 0.09225444 | -3.2478723 | 0.00116271 | 0.02924622 |
| GGA2      | 7080.11286 | -0.284165  | 0.08756072 | -3.2453483 | 0.00117307 | 0.02937615 |
| PCYOX1    | 3754.40641 | -0.336602  | 0.10390616 | -3.2394807 | 0.00119748 | 0.02987605 |
| TMCO3     | 5218.99624 | -0.2935739 | 0.09063599 | -3.2390438 | 0.00119931 | 0.02987605 |
| MAPK6     | 1972.62076 | -0.3966053 | 0.12265679 | -3.2334555 | 0.00122302 | 0.03030806 |
| C5orf49   | 214.04169  | -0.9159725 | 0.2833449  | -3.2327122 | 0.00122621 | 0.03033436 |
| TSPAN1    | 514.884561 | -0.9010094 | 0.2790703  | -3.2286109 | 0.00124393 | 0.03071948 |
| RPS25     | 4983.33021 | -0.3001391 | 0.09307843 | -3.2245827 | 0.00126156 | 0.03099409 |
| TEAD1     | 1416.35999 | -0.3464036 | 0.10751793 | -3.2218211 | 0.00127379 | 0.0311336  |
| MAP7      | 4401.81167 | -0.2420554 | 0.07511965 | -3.2222653 | 0.00127181 | 0.0311336  |
| ABHD15    | 3649.2601  | -0.2724358 | 0.08480434 | -3.2125217 | 0.00131575 | 0.03210435 |
| CXCL6     | 1593.82365 | -0.6369945 | 0.19832995 | -3.2117918 | 0.0013191  | 0.0321311  |
| MBD2      | 1068.26863 | -0.3785774 | 0.11796154 | -3.2093295 | 0.00133045 | 0.03229733 |
| LOXL4     | 24272.6989 | -0.698581  | 0.21817422 | -3.2019413 | 0.00136505 | 0.03302492 |
| CHKA      | 2193.32032 | -0.3172803 | 0.09917201 | -3.1992923 | 0.00137765 | 0.03321729 |
| PLPPR2    | 2180.55029 | -0.2983591 | 0.09334416 | -3.196334  | 0.00139186 | 0.03344337 |
| KLF11     | 1976.14701 | -0.2697318 | 0.08441269 | -3.1953936 | 0.0013964  | 0.03344337 |

|          |            |            |            |            |            |            |
|----------|------------|------------|------------|------------|------------|------------|
| COX11    | 1721.09947 | -0.2986182 | 0.09350422 | -3.193633  | 0.00140495 | 0.03347946 |
| HHLA2    | 89.4774416 | -1.7541992 | 0.54962897 | -3.1916062 | 0.00141484 | 0.03365906 |
| PUM2     | 1910.69767 | -0.3196644 | 0.10035859 | -3.1852218 | 0.00144643 | 0.03418271 |
| SLC22A16 | 15.0960111 | -3.7960864 | 1.19238109 | -3.1836184 | 0.00145447 | 0.03425916 |
| VMA21    | 2656.45196 | -0.3905606 | 0.12289042 | -3.1781205 | 0.00148233 | 0.03468656 |
| LONRF2   | 1440.45947 | -0.4391036 | 0.13829016 | -3.1752336 | 0.00149716 | 0.03497619 |
| GPHN     | 905.68411  | -0.4817979 | 0.15210386 | -3.1675585 | 0.00153725 | 0.03579555 |
| ARRDC4   | 5257.84248 | -0.2115845 | 0.06681038 | -3.1669414 | 0.00154051 | 0.03581317 |
| TRIP12   | 3609.13104 | -0.2361663 | 0.07467231 | -3.1627027 | 0.00156312 | 0.0362207  |
| HCN4     | 208.845799 | -0.9815671 | 0.31045992 | -3.1616549 | 0.00156875 | 0.03629236 |
| TNRC6B   | 2491.94436 | -0.3249576 | 0.10297781 | -3.1556082 | 0.00160164 | 0.03681448 |
| SLC25A6  | 9644.84838 | -0.1702986 | 0.05398875 | -3.1543357 | 0.00160864 | 0.03691595 |
| DPP6     | 2807.45034 | -0.3270064 | 0.10370438 | -3.1532554 | 0.00161461 | 0.03699337 |
| EMC10    | 1663.24221 | -0.3496985 | 0.11119256 | -3.144981  | 0.00166098 | 0.0378566  |
| PIP5K1A  | 1452.47862 | -0.3256065 | 0.1035739  | -3.1437122 | 0.00166819 | 0.0378566  |
| KIAA1147 | 1343.95853 | -0.3150065 | 0.10040662 | -3.1373083 | 0.00170507 | 0.03853846 |
| CNTN1    | 15115.6157 | -0.2835329 | 0.09041195 | -3.136011  | 0.00171263 | 0.03855843 |
| GDI1     | 4789.75581 | -0.2709912 | 0.08679582 | -3.1221684 | 0.00179524 | 0.03991477 |
| TM4SF1   | 4921.41624 | -0.3549869 | 0.11390453 | -3.1165302 | 0.00182993 | 0.04055964 |
| KIF12    | 1831.46768 | -0.3674894 | 0.11794252 | -3.1158343 | 0.00183425 | 0.04059245 |
| PTGDR2   | 152.712645 | -1.0079843 | 0.32374311 | -3.1135313 | 0.00184863 | 0.04084725 |
| TUBB     | 7146.15191 | -0.2242029 | 0.07213874 | -3.1079399 | 0.00188396 | 0.04143559 |
| WDR37    | 690.630872 | -0.4458125 | 0.14369568 | -3.1024767 | 0.00191909 | 0.04209043 |
| GOLGA3   | 1507.68917 | -0.2931381 | 0.09448778 | -3.1023921 | 0.00191964 | 0.04209043 |
| TSPYL2   | 1971.45747 | -0.3088255 | 0.09956462 | -3.1017595 | 0.00192374 | 0.04211578 |
| HS6ST2   | 876.601163 | -0.6991988 | 0.22558175 | -3.0995362 | 0.00193824 | 0.04220976 |
| PLOD3    | 4140.1822  | -0.2236202 | 0.07212364 | -3.1005115 | 0.00193187 | 0.04220976 |
| PRKCI    | 1214.10203 | -0.3428817 | 0.11093133 | -3.0909368 | 0.00199526 | 0.04321754 |
| CLDN7    | 8652.90018 | -0.2542622 | 0.08250293 | -3.0818569 | 0.00205714 | 0.04442296 |
| LNPEP    | 3485.09114 | -0.2766611 | 0.08984732 | -3.0792364 | 0.00207532 | 0.0447479  |
| PIGT     | 17646.0433 | -0.1545835 | 0.05022758 | -3.077661  | 0.00208632 | 0.04484962 |
| PERP     | 9913.39528 | -0.1605352 | 0.05217014 | -3.0771474 | 0.00208992 | 0.04485941 |
| POF1B    | 163.879491 | -0.934561  | 0.30387712 | -3.0754569 | 0.0021018  | 0.04504676 |
| SIPA1L1  | 1472.652   | -0.3421437 | 0.11130993 | -3.073793  | 0.00211356 | 0.04523082 |
| MXRA5    | 91.5867756 | -1.795945  | 0.58445902 | -3.0728331 | 0.00212037 | 0.04530863 |
| FGF19    | 52.5025221 | -3.028958  | 0.98617012 | -3.0714356 | 0.00213032 | 0.04545322 |
| LSAMP    | 996.967197 | -0.5795805 | 0.18892049 | -3.0678544 | 0.00215602 | 0.04586436 |
| TMSB10   | 3224.52889 | -0.3648174 | 0.11899974 | -3.065699  | 0.00217162 | 0.04601241 |
| GLS      | 19530.3184 | -0.1726989 | 0.05633525 | -3.0655573 | 0.00217265 | 0.04601241 |
| GPER1    | 354.013379 | -0.684482  | 0.2233921  | -3.0640386 | 0.00218371 | 0.04607408 |
| FAM84B   | 1035.98051 | -0.4430149 | 0.14459056 | -3.0639271 | 0.00218452 | 0.04607408 |
| SYT13    | 1848.53208 | -0.3674345 | 0.1200744  | -3.0600565 | 0.00221295 | 0.04652089 |
| SDAD1    | 1790.6684  | -0.273785  | 0.08948355 | -3.0596122 | 0.00221624 | 0.04652144 |

|          |            |            |            |            |            |            |
|----------|------------|------------|------------|------------|------------|------------|
| MBD4     | 1914.26115 | -0.274405  | 0.08977623 | -3.056544  | 0.00223905 | 0.04686238 |
| C1orf21  | 520.538928 | -0.4836738 | 0.15832751 | -3.0548941 | 0.0022514  | 0.04705195 |
| MYO5C    | 869.165267 | -0.504121  | 0.16517002 | -3.0521338 | 0.00227221 | 0.04741739 |
| IFT172   | 393.465314 | -0.5296058 | 0.17376705 | -3.0477919 | 0.0023053  | 0.04796761 |
| NOL4     | 2339.17037 | -0.3370817 | 0.11062311 | -3.0471179 | 0.00231047 | 0.04800532 |
| KCNIP1   | 985.551903 | -0.4595382 | 0.15158298 | -3.0315951 | 0.00243265 | 0.05010632 |
| MLYCD    | 1583.9946  | -0.3519422 | 0.11614406 | -3.0302213 | 0.00244375 | 0.05018998 |
| KIF3B    | 2917.47948 | -0.2844141 | 0.09384662 | -3.0306266 | 0.00244047 | 0.05018998 |
| SERPINA4 | 59.416687  | -2.2504539 | 0.74294038 | -3.0291177 | 0.00245269 | 0.05022914 |
| KRT13    | 54.7559002 | -10.226685 | 3.37813883 | -3.0273133 | 0.00246738 | 0.05038539 |
| AP2B1    | 4952.29395 | -0.2077942 | 0.06874126 | -3.0228457 | 0.0025041  | 0.05098931 |
| CCDC186  | 2759.04221 | -0.2837791 | 0.09407584 | -3.0164932 | 0.00255717 | 0.05189716 |
| CDK16    | 1901.73147 | -0.4450511 | 0.14762224 | -3.0147974 | 0.00257151 | 0.05202168 |
| BRD7     | 2014.4289  | -0.2949039 | 0.09782459 | -3.0146191 | 0.00257302 | 0.05202168 |
| MTSS1    | 3032.58816 | -0.2325259 | 0.07719441 | -3.0122116 | 0.00259352 | 0.05228795 |
| SPTBN1   | 5841.86836 | -0.2155119 | 0.07165912 | -3.00746   | 0.00263441 | 0.05303743 |
| HERC1    | 2567.0919  | -0.3468882 | 0.11536174 | -3.0069604 | 0.00263874 | 0.05304985 |
| AHSA1    | 3785.20955 | -0.2521621 | 0.08394969 | -3.0037282 | 0.00266693 | 0.05346604 |
| GLRX     | 1119.89964 | -0.501757  | 0.16717679 | -3.0013554 | 0.00268781 | 0.05363789 |
| SSU72    | 4742.61767 | -0.2903922 | 0.09676876 | -3.0008876 | 0.00269194 | 0.05363789 |
| PPARGC1B | 71.3233068 | -2.0373431 | 0.67968851 | -2.9974659 | 0.00272234 | 0.05404551 |
| ERRF1    | 2399.87137 | -0.3551581 | 0.11851264 | -2.9967951 | 0.00272834 | 0.05408935 |
| FNDC4    | 190.283808 | -0.877886  | 0.29315665 | -2.9945968 | 0.00274808 | 0.0544051  |
| MAP4K5   | 2436.12495 | -0.2480732 | 0.08287337 | -2.9934002 | 0.00275888 | 0.05454323 |
| ZCCHC18  | 278.058894 | -0.8576582 | 0.28675438 | -2.9909157 | 0.00278142 | 0.05491289 |
| OCRL     | 2252.58068 | -0.3790037 | 0.12682677 | -2.9883574 | 0.00280481 | 0.05526122 |
| C8orf76  | 1268.35651 | -0.3481289 | 0.11650353 | -2.9881401 | 0.00280681 | 0.05526122 |
| CALCOCO2 | 7110.28409 | -0.1865732 | 0.06248138 | -2.986061  | 0.00282596 | 0.0555617  |
| NBAS     | 1829.41435 | -0.2766666 | 0.09269225 | -2.9847868 | 0.00283776 | 0.0557169  |
| ME3      | 414.856924 | -0.7463921 | 0.25010443 | -2.984322  | 0.00284208 | 0.05572497 |
| MS4A8    | 401.365928 | -0.5525316 | 0.18546256 | -2.9792083 | 0.00288994 | 0.05658579 |
| ALDH1A3  | 372.24414  | -1.3524643 | 0.45512648 | -2.9716229 | 0.0029623  | 0.05761694 |
| TAGLN3   | 287.438312 | -0.6898317 | 0.23214077 | -2.9716094 | 0.00296243 | 0.05761694 |
| TM9SF2   | 17737.9015 | -0.1351273 | 0.04547332 | -2.9715726 | 0.00296279 | 0.05761694 |
| PMM2     | 1248.35577 | -0.3366462 | 0.11350918 | -2.9658062 | 0.00301891 | 0.05854874 |
| AFAP1    | 509.376726 | -0.4810158 | 0.16269484 | -2.9565522 | 0.003111   | 0.0600898  |
| ACAA2    | 3747.52756 | -0.2288304 | 0.07750139 | -2.952597  | 0.00315113 | 0.06078275 |
| CYP4F12  | 80.5613746 | -1.9776184 | 0.67009895 | -2.9512334 | 0.00316508 | 0.0608872  |
| SLK      | 4358.81254 | -0.2366599 | 0.08025507 | -2.9488467 | 0.00318962 | 0.0612768  |
| ZNF511   | 750.085782 | -0.4073073 | 0.13824714 | -2.9462255 | 0.00321678 | 0.06163261 |
| ERAP1    | 2485.01365 | -0.2595733 | 0.08819197 | -2.9432754 | 0.00324759 | 0.06213962 |
| LRRC42   | 1437.62955 | -0.4425066 | 0.15046713 | -2.9408856 | 0.00327275 | 0.06253721 |
| ERICH3   | 241.365283 | -0.939581  | 0.31960895 | -2.939783  | 0.00328442 | 0.06267625 |

|             |            |            |            |            |            |            |
|-------------|------------|------------|------------|------------|------------|------------|
| USP45       | 388.784072 | -0.5557849 | 0.18923966 | -2.9369365 | 0.00331472 | 0.06316998 |
| UBR2        | 1959.62654 | -0.2914291 | 0.09930027 | -2.9348266 | 0.00333734 | 0.06343171 |
| NR0B1       | 764.286709 | -0.7319198 | 0.24946034 | -2.9340129 | 0.0033461  | 0.06351366 |
| PLXNA3      | 738.243767 | -0.388368  | 0.13242105 | -2.9328269 | 0.00335891 | 0.0636721  |
| GOSR2       | 2695.56748 | -0.2306568 | 0.07869962 | -2.9308502 | 0.00338036 | 0.06399366 |
| CRIM1       | 752.058015 | -0.5205732 | 0.17768829 | -2.9296992 | 0.0033929  | 0.06414608 |
| OTUD3       | 394.636517 | -0.5594356 | 0.19105387 | -2.9281563 | 0.00340979 | 0.06429496 |
| SLC5A3      | 677.247535 | -0.4638682 | 0.15840564 | -2.9283567 | 0.00340759 | 0.06429496 |
| ANAPC15     | 548.147232 | -0.5067751 | 0.17310156 | -2.927617  | 0.00341571 | 0.06432161 |
| RP11.977G19 | 395.845101 | -0.6726064 | 0.23006677 | -2.9235268 | 0.0034609  | 0.06508688 |
| SMPD3       | 403.923592 | -0.6891716 | 0.23582514 | -2.9223837 | 0.00347363 | 0.06513218 |
| TMSB4X      | 23832.7718 | -0.2827062 | 0.09679889 | -2.9205525 | 0.00349411 | 0.06531578 |
| MAP7D3      | 589.541076 | -0.4579694 | 0.15694282 | -2.9180653 | 0.00352211 | 0.06566213 |
| EEF2K       | 294.847758 | -0.6879957 | 0.23601315 | -2.9150737 | 0.00355605 | 0.0660065  |
| PROS1       | 666.929457 | -0.7192116 | 0.24710493 | -2.9105513 | 0.00360792 | 0.06679562 |
| TRIO        | 1022.88408 | -0.3406141 | 0.11712938 | -2.9080156 | 0.0036373  | 0.06715703 |
| ACAT1       | 3619.08513 | -0.2356757 | 0.0810512  | -2.9077383 | 0.00364053 | 0.06715703 |
| HSP90B1     | 26629.2672 | -0.1797581 | 0.06195067 | -2.9016326 | 0.00371224 | 0.06819622 |
| LRP11       | 10501.8929 | -0.2496092 | 0.08604427 | -2.9009389 | 0.00372046 | 0.06825951 |
| ZNF169      | 40.0643167 | -2.3536616 | 0.81170112 | -2.8996653 | 0.00373561 | 0.06836171 |
| FGFR1       | 9658.51409 | -0.2588139 | 0.08930829 | -2.8979834 | 0.00375571 | 0.0686414  |
| MAP3K4      | 1294.9051  | -0.3011782 | 0.1040061  | -2.8957741 | 0.00378225 | 0.06903809 |
| AAED1       | 1339.93218 | -0.3495551 | 0.12073645 | -2.8951908 | 0.00378928 | 0.06907816 |
| SLC38A8     | 116.649165 | -0.9947649 | 0.34382735 | -2.8932105 | 0.00381326 | 0.0692499  |
| HPSE        | 776.588472 | -0.4902623 | 0.1697259  | -2.8885532 | 0.00387019 | 0.06992788 |
| KIAA0922    | 363.892899 | -0.6518577 | 0.22592273 | -2.8853125 | 0.00391025 | 0.07056253 |
| MAP6        | 2866.53654 | -0.2172031 | 0.07533782 | -2.8830547 | 0.00393839 | 0.07098053 |
| SLC29A4     | 6575.88548 | -0.2558327 | 0.08886795 | -2.8787956 | 0.00399197 | 0.07158465 |
| AZI2        | 1803.89879 | -0.252094  | 0.08782245 | -2.8704967 | 0.00409828 | 0.07276529 |
| HSP90AB1    | 45198.686  | -0.1538544 | 0.05377316 | -2.8611739 | 0.00422076 | 0.07428738 |
| MEP1B       | 101.581381 | -1.7023141 | 0.59514477 | -2.8603361 | 0.00423192 | 0.07439218 |
| LDLRAD1     | 51.8029845 | -2.2476747 | 0.78640622 | -2.8581599 | 0.00426106 | 0.07462862 |
| CKMT1B      | 1270.43142 | -0.4647798 | 0.16264988 | -2.8575479 | 0.00426928 | 0.07468105 |
| TPPP3       | 1289.1264  | -0.3890273 | 0.13631902 | -2.8538005 | 0.00431997 | 0.07534455 |
| MYO1B       | 8955.35212 | -0.1835182 | 0.06432046 | -2.8531861 | 0.00432833 | 0.07534455 |
| GTPBP4      | 2423.723   | -0.2494889 | 0.08761661 | -2.847507  | 0.00440631 | 0.07651545 |
| BRS3        | 375.171814 | -0.7704259 | 0.27068803 | -2.8461766 | 0.00442477 | 0.07666027 |
| TOM1L2      | 991.363463 | -0.3483703 | 0.12241127 | -2.8459005 | 0.0044286  | 0.07666027 |
| KIAA1109    | 1776.48641 | -0.2741979 | 0.09635365 | -2.8457452 | 0.00443076 | 0.07666027 |
| TRPC4       | 364.137892 | -0.6505119 | 0.22876422 | -2.843591  | 0.00446083 | 0.07699376 |
| OTOGL       | 149.875192 | -0.9541542 | 0.33575    | -2.8418592 | 0.00448513 | 0.07722646 |
| FAM213A     | 3325.89918 | -0.2046425 | 0.0723088  | -2.8301187 | 0.00465307 | 0.08002165 |
| IKBKAP      | 1934.67275 | -0.3311226 | 0.11702974 | -2.8293885 | 0.0046637  | 0.08010796 |

|          |            |            |            |            |            |            |
|----------|------------|------------|------------|------------|------------|------------|
| PCSK2    | 31370.5794 | -0.2737431 | 0.09677901 | -2.8285382 | 0.00467611 | 0.08022456 |
| CRB1     | 89.5345556 | -1.6332052 | 0.57798697 | -2.8256783 | 0.00471806 | 0.08040733 |
| ZNF28    | 1327.27541 | -0.4693647 | 0.16608876 | -2.8259868 | 0.00471352 | 0.08040733 |
| CLCN5    | 1747.17268 | -0.3316956 | 0.11752118 | -2.8224327 | 0.00476608 | 0.08108588 |
| CELSR2   | 374.183339 | -0.5261364 | 0.18663979 | -2.8189935 | 0.00481745 | 0.0818554  |
| TRNP1    | 1378.85819 | -0.3589985 | 0.12736594 | -2.8186384 | 0.00482278 | 0.0818554  |
| TTR      | 698131.649 | -0.1812204 | 0.06435372 | -2.816005  | 0.00486249 | 0.08243136 |
| APOLD1   | 34.8812878 | -1.769533  | 0.62899971 | -2.8132493 | 0.00490436 | 0.08304254 |
| HSPA5    | 39840.9004 | -0.1611831 | 0.05734792 | -2.8106185 | 0.00494464 | 0.08342762 |
| CPA4     | 45.3158813 | -2.8181649 | 1.00351178 | -2.8083028 | 0.00498034 | 0.08393075 |
| LIPG     | 345.515077 | -0.8977965 | 0.31979825 | -2.8073842 | 0.00499456 | 0.08407122 |
| KL       | 2420.16383 | -0.2855352 | 0.10187981 | -2.8026671 | 0.0050682  | 0.08471128 |
| SPOCK3   | 2552.7302  | -0.2655988 | 0.09476048 | -2.8028431 | 0.00506543 | 0.08471128 |
| KARS     | 4209.58108 | -0.233047  | 0.08325148 | -2.7993139 | 0.00512113 | 0.08549596 |
| SPRED3   | 227.171944 | -0.7158    | 0.25574825 | -2.7988463 | 0.00512855 | 0.08551984 |
| CNIH2    | 361.844589 | -0.5310028 | 0.18981818 | -2.7974285 | 0.00515112 | 0.08569586 |
| ZC3H12C  | 547.004644 | -0.4364094 | 0.15598333 | -2.7977951 | 0.00514528 | 0.08569586 |
| MUC20    | 522.966967 | -0.7447676 | 0.26658212 | -2.7937644 | 0.00520984 | 0.08637493 |
| FAM210A  | 479.948538 | -0.4503054 | 0.16118319 | -2.7937491 | 0.00521009 | 0.08637493 |
| FFAR3    | 171.397455 | -0.768781  | 0.27524359 | -2.7930931 | 0.00522067 | 0.08644988 |
| KSR2     | 369.731875 | -0.572402  | 0.20561116 | -2.7839053 | 0.00537087 | 0.08851554 |
| LRRC49   | 389.162062 | -0.5300492 | 0.19042062 | -2.7835706 | 0.00537642 | 0.08851554 |
| AGFG2    | 722.370955 | -0.4679012 | 0.16812627 | -2.7830343 | 0.00538531 | 0.08855984 |
| ALDH6A1  | 403.916969 | -0.4995057 | 0.17962145 | -2.78088   | 0.00542118 | 0.08894469 |
| TTLL12   | 837.71077  | -0.5020228 | 0.18063236 | -2.7792515 | 0.00544843 | 0.08928923 |
| FAT4     | 107.794757 | -1.4126854 | 0.50848284 | -2.778236  | 0.00546549 | 0.08940688 |
| CPD      | 7998.89178 | -0.1871732 | 0.06737507 | -2.7780787 | 0.00546814 | 0.08940688 |
| PDK4     | 38666.3092 | -0.6043997 | 0.21787121 | -2.7741148 | 0.00553522 | 0.09019367 |
| YTHDF3   | 4583.28831 | -0.255434  | 0.09206614 | -2.7744624 | 0.0055293  | 0.09019367 |
| C3orf80  | 160.885313 | -1.1445093 | 0.41324744 | -2.7695498 | 0.00561338 | 0.09106793 |
| NLN      | 377.998609 | -0.604173  | 0.21858385 | -2.7640332 | 0.00570917 | 0.09221713 |
| ZNF107   | 559.176777 | -0.4219353 | 0.15263337 | -2.7643713 | 0.00570326 | 0.09221713 |
| FAT3     | 69.1707283 | -1.9567964 | 0.70862507 | -2.7613988 | 0.00575543 | 0.09272355 |
| APOH     | 1425.77359 | -0.2815373 | 0.10217295 | -2.7554971 | 0.0058603  | 0.09398872 |
| ATP8A1   | 794.61087  | -0.5313275 | 0.19308733 | -2.751747  | 0.00592783 | 0.09475234 |
| SDF2L1   | 1786.65147 | -0.3067595 | 0.11159326 | -2.7489071 | 0.00597943 | 0.0953636  |
| MEAF6    | 3542.87794 | -0.2082595 | 0.0757532  | -2.7491846 | 0.00597437 | 0.0953636  |
| PPL      | 3688.00396 | -0.2239969 | 0.08156113 | -2.7463683 | 0.00602591 | 0.09582749 |
| CD55     | 11806.0853 | -0.214991  | 0.07832001 | -2.7450324 | 0.00605049 | 0.09606755 |
| NKRF     | 397.569165 | -0.541348  | 0.19750595 | -2.7409201 | 0.00612674 | 0.09695465 |
| HSP90AA1 | 31491.8202 | -0.184137  | 0.06726607 | -2.7374421 | 0.0061919  | 0.09776903 |
| ZKSCAN1  | 7137.35753 | -0.1762264 | 0.06436919 | -2.7377451 | 0.0061862  | 0.09776903 |
| TEF      | 584.529975 | -0.397511  | 0.14533898 | -2.7350613 | 0.00623687 | 0.0981762  |

|       |            |            |           |            |            |            |
|-------|------------|------------|-----------|------------|------------|------------|
| PDIA6 | 12436.8168 | -0.1514296 | 0.0555011 | -2.7284067 | 0.00636411 | 0.09938871 |
|-------|------------|------------|-----------|------------|------------|------------|
