# Supplementary material
Source: publisher figshare collection journal article supplement (https://diabetesjournals.figshare.com/articles/dataset/_/24615675)
Supplement: Supplementary file 5 [file 2]

**Supplemental Table S3**

|          | baseMean   | log2FoldChan | lfcSE      | stat       | pvalue   | padj     |
|----------|------------|--------------|------------|------------|----------|----------|
| EVA1A    | 3982.12991 | 1.10169403   | 0.08831355 | 12.4748018 | 1.02E-35 | 1.46E-31 |
| GCNT3    | 4172.43194 | 1.13385571   | 0.11064973 | 10.2472524 | 1.22E-24 | 2.90E-21 |
| SPINK1   | 16496.4148 | 0.73435889   | 0.07796993 | 9.41848864 | 4.58E-21 | 8.17E-18 |
| CDKN1A   | 18587.103  | 0.5889942    | 0.06908011 | 8.52624854 | 1.51E-17 | 1.20E-14 |
| FGB      | 1490.95375 | 1.58043919   | 0.19176571 | 8.2415109  | 1.70E-16 | 1.16E-13 |
| C1QTNF3  | 1594.92759 | 1.29136105   | 0.16399618 | 7.87433611 | 3.43E-15 | 1.88E-12 |
| SOD2     | 32092.0492 | 0.75915789   | 0.10374646 | 7.31743386 | 2.53E-13 | 9.75E-11 |
| IFIT2    | 2400.72409 | 0.57431631   | 0.08003725 | 7.17561292 | 7.20E-13 | 2.51E-10 |
| TAP1     | 5428.00318 | 0.70763144   | 0.10095904 | 7.00909432 | 2.40E-12 | 7.78E-10 |
| ZNRF1    | 3309.50182 | 0.78896162   | 0.11550734 | 6.83040237 | 8.47E-12 | 2.28E-09 |
| TSPAN12  | 1841.63129 | 0.59779163   | 0.08997407 | 6.64404366 | 3.05E-11 | 7.51E-09 |
| MX1      | 4219.32184 | 0.84988182   | 0.12838275 | 6.61990689 | 3.59E-11 | 8.67E-09 |
| GADD45G  | 7640.91396 | 0.40386259   | 0.06107909 | 6.61212566 | 3.79E-11 | 8.73E-09 |
| PSMB8    | 3160.38072 | 0.54939729   | 0.08330097 | 6.59532907 | 4.24E-11 | 9.32E-09 |
| BIRC3    | 2021.56297 | 0.94451515   | 0.14586836 | 6.47512006 | 9.47E-11 | 1.96E-08 |
| HABP2    | 913.727609 | 1.61817439   | 0.26321065 | 6.1478302  | 7.86E-10 | 1.38E-07 |
| PLA1A    | 2382.73733 | 1.13063505   | 0.18493236 | 6.11377601 | 9.73E-10 | 1.61E-07 |
| DNAJC12  | 10849.1717 | 0.41182778   | 0.06744668 | 6.10597571 | 1.02E-09 | 1.66E-07 |
| NELL2    | 699.24712  | 1.21871087   | 0.20936487 | 5.82099017 | 5.85E-09 | 8.27E-07 |
| ISG15    | 2393.16483 | 0.76611119   | 0.1323322  | 5.7893029  | 7.07E-09 | 9.89E-07 |
| SHISA5   | 6487.65957 | 0.49226432   | 0.08551007 | 5.75679954 | 8.57E-09 | 1.15E-06 |
| CYSTM1   | 20214.1919 | 0.31125307   | 0.05501897 | 5.65719602 | 1.54E-08 | 1.93E-06 |
| ICAM1    | 4782.39149 | 0.71387365   | 0.127975   | 5.5782276  | 2.43E-08 | 2.89E-06 |
| ARL4C    | 2382.08618 | 0.60005488   | 0.10778901 | 5.56693924 | 2.59E-08 | 3.06E-06 |
| SIGMAR1  | 1669.53871 | 0.58484021   | 0.10693189 | 5.46927787 | 4.52E-08 | 5.20E-06 |
| CIB1     | 5103.97698 | 0.39855436   | 0.07309536 | 5.45252602 | 4.97E-08 | 5.63E-06 |
| PSAT1    | 381.424573 | 1.00851961   | 0.18658486 | 5.4051523  | 6.48E-08 | 7.11E-06 |
| SEMA4B   | 5284.80203 | 0.70083918   | 0.13127643 | 5.33865205 | 9.36E-08 | 1.01E-05 |
| PSME2    | 5552.59892 | 0.34407639   | 0.06457121 | 5.32863438 | 9.90E-08 | 1.06E-05 |
| RBCK1    | 4101.83115 | 0.51217589   | 0.09787217 | 5.23311054 | 1.67E-07 | 1.68E-05 |
| SLC40A1  | 11743.385  | 0.56405434   | 0.10804714 | 5.2204466  | 1.78E-07 | 1.77E-05 |
| SPNS1    | 1555.90657 | 0.60345478   | 0.11619196 | 5.1936021  | 2.06E-07 | 2.02E-05 |
| ATP2B1   | 8632.14436 | 0.38228802   | 0.07428546 | 5.14620233 | 2.66E-07 | 2.53E-05 |
| PHLDA3   | 1829.44188 | 0.57486486   | 0.11209628 | 5.12831341 | 2.92E-07 | 2.76E-05 |
| SDR16C5  | 898.256019 | 1.17447725   | 0.23129753 | 5.07777683 | 3.82E-07 | 3.56E-05 |
| PLIN2    | 5921.05445 | 0.45203197   | 0.09017297 | 5.01294326 | 5.36E-07 | 4.87E-05 |
| GRAMD3   | 1766.31283 | 0.48779766   | 0.09737189 | 5.00963541 | 5.45E-07 | 4.93E-05 |
| FAS      | 905.931655 | 0.6076961    | 0.1215963  | 4.99765297 | 5.80E-07 | 5.21E-05 |
| ID1      | 7201.77921 | 0.59354788   | 0.11882152 | 4.9952894  | 5.87E-07 | 5.24E-05 |
| RDH10    | 1830.79551 | 0.81740831   | 0.1649261  | 4.9562096  | 7.19E-07 | 6.37E-05 |
| C6orf106 | 2098.44027 | 0.57067014   | 0.11592601 | 4.92271027 | 8.54E-07 | 7.38E-05 |

|          |            |            |            |            |          |            |
|----------|------------|------------|------------|------------|----------|------------|
| LRRN1    | 163.423475 | 1.3534323  | 0.2754893  | 4.91283068 | 8.98E-07 | 7.72E-05   |
| APBB2    | 1840.78094 | 0.53038779 | 0.1080511  | 4.90867545 | 9.17E-07 | 7.84E-05   |
| IFIT3    | 1821.84045 | 0.71718523 | 0.14653778 | 4.89420022 | 9.87E-07 | 8.39E-05   |
| FAM110C  | 575.304016 | 0.92092406 | 0.19029526 | 4.83944824 | 1.30E-06 | 0.0001056  |
| NRP2     | 910.833228 | 0.75887171 | 0.15827525 | 4.79463274 | 1.63E-06 | 0.00012782 |
| DIP2C    | 3111.44592 | 0.43970285 | 0.09332159 | 4.71169483 | 2.46E-06 | 0.00018456 |
| ISCU     | 4286.86941 | 0.37615567 | 0.07985628 | 4.71040831 | 2.47E-06 | 0.00018476 |
| FBLN2    | 30.7603638 | 4.75381231 | 1.01304267 | 4.69260819 | 2.70E-06 | 0.00019697 |
| WARS     | 3397.01581 | 0.40998676 | 0.08738875 | 4.69152772 | 2.71E-06 | 0.00019697 |
| BMP3     | 45.2704632 | 3.6410119  | 0.77904155 | 4.67370694 | 2.96E-06 | 0.00021325 |
| SLC39A1  | 7959.51275 | 0.32722005 | 0.07022663 | 4.65948643 | 3.17E-06 | 0.00022624 |
| BTG1     | 9789.61544 | 0.28359123 | 0.06106174 | 4.64433574 | 3.41E-06 | 0.00024228 |
| TNFRSF1A | 4589.00129 | 0.5373327  | 0.11600327 | 4.63204808 | 3.62E-06 | 0.00025585 |
| RARRES3  | 851.597728 | 0.80842676 | 0.17479378 | 4.62503177 | 3.75E-06 | 0.00026336 |
| UBXN11   | 689.135094 | 0.69056996 | 0.15014482 | 4.59935915 | 4.24E-06 | 0.00029083 |
| GBP2     | 2346.50639 | 0.62755274 | 0.13667514 | 4.59156482 | 4.40E-06 | 0.00029903 |
| CEACAM1  | 3492.12932 | 0.40866365 | 0.08905634 | 4.58882153 | 4.46E-06 | 0.00030155 |
| CFB      | 7461.96636 | 0.55556594 | 0.1211003  | 4.58765123 | 4.48E-06 | 0.00030182 |
| TNS3     | 1934.74893 | 0.55412451 | 0.12108052 | 4.57649609 | 4.73E-06 | 0.00031391 |
| STXBP6   | 1981.04877 | 0.46991194 | 0.10290126 | 4.56662951 | 4.96E-06 | 0.00032753 |
| PPP2R2B  | 3709.35127 | 0.39219762 | 0.08619155 | 4.55030256 | 5.36E-06 | 0.00035237 |
| PARP12   | 1593.18908 | 0.6603901  | 0.14544963 | 4.54033541 | 5.62E-06 | 0.00036775 |
| TAPBP    | 12586.9935 | 0.48607926 | 0.10733472 | 4.52863036 | 5.94E-06 | 0.00038519 |
| ID4      | 12384.3705 | 0.35979341 | 0.07952889 | 4.52405919 | 6.07E-06 | 0.00039182 |
| PLEKHA1  | 7525.62271 | 0.35152133 | 0.0780062  | 4.50632539 | 6.60E-06 | 0.00041845 |
| ATF3     | 2153.03907 | 0.38300117 | 0.08508514 | 4.50138729 | 6.75E-06 | 0.00042452 |
| TMEM163  | 3188.09516 | 0.35240286 | 0.07828064 | 4.50178796 | 6.74E-06 | 0.00042452 |
| IFIH1    | 4222.95964 | 0.47866943 | 0.10658391 | 4.49101036 | 7.09E-06 | 0.00044185 |
| ST3GAL6  | 1241.54901 | 0.59537999 | 0.13377114 | 4.45073581 | 8.56E-06 | 0.00051759 |
| SLC12A7  | 1541.13903 | 0.49633528 | 0.11150801 | 4.4511177  | 8.54E-06 | 0.00051759 |
| FGA      | 547.608649 | 1.47579619 | 0.33266245 | 4.43631729 | 9.15E-06 | 0.00054654 |
| PAX6     | 13567.4949 | 0.29315739 | 0.06615236 | 4.43154836 | 9.36E-06 | 0.00055184 |
| CCL20    | 446.958515 | 1.39919023 | 0.31617152 | 4.42541519 | 9.63E-06 | 0.00056542 |
| CLPX     | 1591.94159 | 0.44693706 | 0.10170583 | 4.39440953 | 1.11E-05 | 0.0006413  |
| PTGS2    | 1207.20011 | 0.61551486 | 0.14029869 | 4.38717472 | 1.15E-05 | 0.00065828 |
| TGM2     | 32234.7687 | 1.34027577 | 0.30579216 | 4.3829632  | 1.17E-05 | 0.00066846 |
| NEURL3   | 1272.55741 | 0.62936877 | 0.14383871 | 4.37551731 | 1.21E-05 | 0.0006862  |
| DPY19L1  | 1927.31505 | 0.58617156 | 0.13499522 | 4.34216529 | 1.41E-05 | 0.00077755 |
| LTBR     | 3258.30854 | 0.40493469 | 0.09362979 | 4.32484893 | 1.53E-05 | 0.00082528 |
| SLC35A4  | 3648.83759 | 0.34959741 | 0.08099464 | 4.3163029  | 1.59E-05 | 0.00084823 |
| SEMA3A   | 257.274678 | 1.04101712 | 0.24325307 | 4.27956418 | 1.87E-05 | 0.0009791  |
| NELFCD   | 6510.55968 | 0.28875497 | 0.06832965 | 4.22591017 | 2.38E-05 | 0.00121752 |
| ASPH     | 23324.8177 | 0.3566489  | 0.08485736 | 4.2029223  | 2.63E-05 | 0.001329   |

|         |            |            |            |            |            |            |
|---------|------------|------------|------------|------------|------------|------------|
| SESN1   | 5175.17567 | 0.4138675  | 0.09946867 | 4.16078238 | 3.17E-05   | 0.00157192 |
| RPS27L  | 5416.26842 | 0.33033539 | 0.07953392 | 4.1533902  | 3.28E-05   | 0.00161798 |
| RAB3C   | 5062.49552 | 0.38273233 | 0.09230627 | 4.14633104 | 3.38E-05   | 0.0016629  |
| PTP4A3  | 8280.4374  | 0.37668072 | 0.09095728 | 4.14129261 | 3.45E-05   | 0.00168821 |
| NFKBIA  | 16374.5287 | 0.38450756 | 0.09322118 | 4.12468039 | 3.71E-05   | 0.00180246 |
| CETN2   | 1404.95165 | 0.42496275 | 0.10308471 | 4.12246156 | 3.75E-05   | 0.00181374 |
| RRAS    | 977.356751 | 0.63226851 | 0.1534086  | 4.12146731 | 3.76E-05   | 0.00181544 |
| PID1    | 569.77651  | 0.79522247 | 0.193355   | 4.11275877 | 3.91E-05   | 0.0018664  |
| IL12A   | 222.993339 | 1.0257154  | 0.25027477 | 4.09835709 | 4.16E-05   | 0.00197319 |
| MAPRE1  | 12151.122  | 0.31860534 | 0.07775501 | 4.09755372 | 4.18E-05   | 0.0019735  |
| MEIS2   | 1987.31796 | 0.38680033 | 0.09463306 | 4.08736976 | 4.36E-05   | 0.00204856 |
| QSOX1   | 2906.87893 | 0.50629095 | 0.12408531 | 4.08018462 | 4.50E-05   | 0.002106   |
| PSENNEN | 2060.65929 | 0.36322344 | 0.08932873 | 4.06614367 | 4.78E-05   | 0.00221513 |
| TRIB3   | 2200.20486 | 0.36113568 | 0.08894476 | 4.06022453 | 4.90E-05   | 0.00225933 |
| HIF1A   | 11305.1115 | 0.2229192  | 0.05490588 | 4.06002426 | 4.91E-05   | 0.00225933 |
| SLC30A1 | 1582.29177 | 0.45976386 | 0.11334227 | 4.05642024 | 4.98E-05   | 0.00228708 |
| TMEM140 | 761.369755 | 0.75305935 | 0.18603075 | 4.04803688 | 5.16E-05   | 0.00235539 |
| AEN     | 4275.37922 | 0.3125379  | 0.07738468 | 4.03875702 | 5.37E-05   | 0.00243497 |
| FXD3    | 3288.68281 | 0.44909743 | 0.11178602 | 4.01747414 | 5.88E-05   | 0.00260768 |
| UTRN    | 3945.68518 | 0.38713385 | 0.09634777 | 4.01808828 | 5.87E-05   | 0.00260768 |
| AHI1    | 4857.41487 | 0.25229651 | 0.06279738 | 4.01762804 | 5.88E-05   | 0.00260768 |
| PSMB9   | 1288.76894 | 0.57446309 | 0.14358281 | 4.00091836 | 6.31E-05   | 0.00277123 |
| CCNG1   | 3000.02917 | 0.36281355 | 0.09083985 | 3.99399126 | 6.50E-05   | 0.0028274  |
| DENND2D | 1773.26212 | 0.41957328 | 0.10554642 | 3.97524864 | 7.03E-05   | 0.00303186 |
| TOX3    | 2394.97439 | 0.48726084 | 0.1226184  | 3.9737987  | 7.07E-05   | 0.00304119 |
| NDUFV2  | 5075.8441  | 0.24886484 | 0.06273751 | 3.96676296 | 7.29E-05   | 0.00308587 |
| PIK3IP1 | 802.804695 | 0.74018783 | 0.18663439 | 3.96597779 | 7.31E-05   | 0.00308689 |
| VNN2    | 632.514971 | 0.65551706 | 0.16588912 | 3.95153737 | 7.77E-05   | 0.0032504  |
| ZFP36L1 | 1163.22573 | 0.57133418 | 0.14557582 | 3.92465034 | 8.69E-05   | 0.00358318 |
| FNIP2   | 8934.25771 | 0.26506803 | 0.0676936  | 3.91570325 | 9.01E-05   | 0.00370799 |
| PIM2    | 1151.62917 | 0.48476809 | 0.12421391 | 3.90268779 | 9.51E-05   | 0.00389081 |
| UBE2L6  | 2623.64313 | 0.47134504 | 0.12100729 | 3.89517887 | 9.81E-05   | 0.00397913 |
| CASP7   | 1833.97788 | 0.43409687 | 0.11169651 | 3.88639606 | 0.00010174 | 0.00409095 |
| SLC17A1 | 440.125502 | 1.26204107 | 0.32530347 | 3.87958073 | 0.00010464 | 0.00417202 |
| IFIT1   | 1187.25356 | 0.54801046 | 0.14157509 | 3.87081127 | 0.00010847 | 0.00427722 |
| SEPW1   | 2204.67494 | 0.35792391 | 0.09251382 | 3.8688697  | 0.00010934 | 0.00429954 |
| SPC25   | 1545.43717 | 0.45808385 | 0.11871336 | 3.8587389  | 0.00011397 | 0.00445715 |
| SPPL2A  | 8235.16208 | 0.28111899 | 0.07293059 | 3.85461031 | 0.00011591 | 0.0045083  |
| SLC6A16 | 31.6078547 | 3.39333371 | 0.88147795 | 3.84959569 | 0.00011831 | 0.00457669 |
| RNF213  | 7837.78708 | 0.36419376 | 0.09595255 | 3.79556112 | 0.00014731 | 0.00557746 |
| NECTIN2 | 4264.82401 | 0.29345943 | 0.07740577 | 3.79118281 | 0.00014993 | 0.0056319  |
| RHPN1   | 810.433567 | 0.47090706 | 0.12441079 | 3.78509828 | 0.00015365 | 0.00575635 |
| APOBEC2 | 338.876851 | 0.96309469 | 0.25821967 | 3.72974944 | 0.00019167 | 0.00694391 |

|             |            |            |            |            |            |            |
|-------------|------------|------------|------------|------------|------------|------------|
| KCNK17      | 1477.6724  | 0.4358085  | 0.11752934 | 3.70808274 | 0.00020883 | 0.00745226 |
| STAT1       | 7413.98511 | 0.39289302 | 0.10634933 | 3.69436309 | 0.00022044 | 0.00780779 |
| ACER2       | 192.052593 | 1.04851048 | 0.2854806  | 3.67279065 | 0.00023992 | 0.00843488 |
| SCAMP4      | 1244.02446 | 0.39415016 | 0.10753053 | 3.66547215 | 0.00024688 | 0.00863726 |
| RSPH1       | 299.460901 | 0.7628456  | 0.2085068  | 3.65861254 | 0.00025358 | 0.00882845 |
| PARP10      | 1130.14174 | 0.41485356 | 0.11355949 | 3.65318271 | 0.00025901 | 0.00895183 |
| C5orf15     | 5106.68436 | 0.27244435 | 0.07500406 | 3.63239456 | 0.0002808  | 0.00963506 |
| ACHE        | 2031.32645 | 0.45836101 | 0.12622557 | 3.63128497 | 0.00028201 | 0.00965339 |
| FUK         | 393.179676 | 0.81912255 | 0.22568501 | 3.62949478 | 0.00028398 | 0.00969732 |
| PLA2G4C     | 2754.1297  | 0.37732591 | 0.10413536 | 3.62341778 | 0.00029074 | 0.00988086 |
| JOSD2       | 230.934864 | 1.02504699 | 0.28374601 | 3.61255117 | 0.0003032  | 0.01019893 |
| NEU1        | 10530.5648 | 0.22194656 | 0.06145892 | 3.61129958 | 0.00030467 | 0.01020847 |
| MAPRE2      | 7403.32171 | 0.2202462  | 0.06111674 | 3.60369695 | 0.00031372 | 0.01041414 |
| SGK2        | 802.863805 | 0.61263715 | 0.1700942  | 3.6017521  | 0.00031608 | 0.01046803 |
| RCE1        | 734.559234 | 0.49493322 | 0.13821639 | 3.58085772 | 0.00034247 | 0.01118625 |
| STAP2       | 784.498193 | 0.477348   | 0.13329578 | 3.58111871 | 0.00034213 | 0.01118625 |
| BDKRB1      | 227.583582 | 0.93141505 | 0.26078949 | 3.57152066 | 0.00035492 | 0.01153998 |
| RHBDF2      | 1373.97256 | 0.5339871  | 0.14966112 | 3.56797481 | 0.00035975 | 0.01165833 |
| CASP3       | 3357.63404 | 0.32732958 | 0.09174918 | 3.56765668 | 0.00036019 | 0.01165833 |
| NCF2        | 22.45724   | 4.00026985 | 1.12193221 | 3.56551832 | 0.00036314 | 0.01170074 |
| PIFO        | 370.41829  | 0.88577377 | 0.24874122 | 3.56102533 | 0.00036941 | 0.01187601 |
| NRAS        | 3203.46167 | 0.2537429  | 0.07157998 | 3.54488668 | 0.00039278 | 0.01254266 |
| SLCO5A1     | 629.371053 | 0.83163078 | 0.23472583 | 3.54298796 | 0.00039562 | 0.01257704 |
| CDIPT       | 2109.75816 | 0.32838415 | 0.09268374 | 3.54306091 | 0.00039551 | 0.01257704 |
| FFAR2       | 683.531523 | 0.75398477 | 0.21337294 | 3.53364748 | 0.00040987 | 0.01300099 |
| IFI6        | 6317.93243 | 0.97681254 | 0.27729068 | 3.52270234 | 0.00042717 | 0.01351982 |
| COMT        | 3787.87711 | 0.25440384 | 0.07226494 | 3.52043261 | 0.00043084 | 0.01357585 |
| HARS2       | 1096.21465 | 0.48283055 | 0.13753057 | 3.51071427 | 0.0004469  | 0.01405091 |
| DST         | 30873.8366 | 0.29202092 | 0.08324718 | 3.50787782 | 0.0004517  | 0.01413246 |
| RP11.724O16 | 258.773763 | 0.81210866 | 0.23166154 | 3.50558265 | 0.00045561 | 0.01419948 |
| TIMP1       | 36056.8632 | 0.30470612 | 0.08721522 | 3.49372639 | 0.00047633 | 0.0148129  |
| NGRN        | 8598.79514 | 0.25153896 | 0.0721349  | 3.48706315 | 0.00048836 | 0.0151222  |
| SNN         | 384.193816 | 0.75912812 | 0.2179167  | 3.4835702  | 0.00049477 | 0.01522068 |
| PTK7        | 955.271171 | 0.43496065 | 0.12531581 | 3.47091588 | 0.00051869 | 0.01577847 |
| SCAMP3      | 4672.87801 | 0.21773579 | 0.06272068 | 3.47151505 | 0.00051753 | 0.01577847 |
| MAPK4       | 1309.05092 | 0.56538576 | 0.16336962 | 3.46077655 | 0.00053862 | 0.01618581 |
| ELN         | 64.5657349 | 2.87406638 | 0.83587715 | 3.4383837  | 0.0005852  | 0.01740232 |
| FLRT3       | 4204.82366 | 0.30150679 | 0.08774542 | 3.43615407 | 0.00059004 | 0.0175097  |
| FAM101A     | 140.881311 | 1.32457626 | 0.38593252 | 3.43214468 | 0.00059883 | 0.01769704 |
| APOL6       | 2189.3657  | 0.5958166  | 0.17357251 | 3.43266694 | 0.00059768 | 0.01769704 |
| GLI2        | 28.4890282 | 4.32104897 | 1.26097158 | 3.4267616  | 0.00061083 | 0.01786663 |
| STK39       | 677.898584 | 0.54508229 | 0.15905457 | 3.42701431 | 0.00061026 | 0.01786663 |
| RIMKLB      | 831.487511 | 0.44692479 | 0.1304863  | 3.42507059 | 0.00061464 | 0.01786837 |

|          |            |            |            |            |            |            |
|----------|------------|------------|------------|------------|------------|------------|
| SHROOM1  | 1448.77408 | 0.60033561 | 0.1757502  | 3.41584595 | 0.00063584 | 0.01833537 |
| BTN3A2   | 269.654607 | 0.82204335 | 0.24085176 | 3.41306757 | 0.00064236 | 0.01848599 |
| ABCC9    | 2343.00458 | 0.35495428 | 0.10408334 | 3.41028904 | 0.00064894 | 0.01856308 |
| HMG1A1   | 797.249654 | 0.48563569 | 0.14265498 | 3.4042673  | 0.00066342 | 0.01892917 |
| MAP3K12  | 609.20766  | 0.55759432 | 0.16389817 | 3.40207771 | 0.00066876 | 0.01897779 |
| MPPE1    | 2135.27131 | 0.40172965 | 0.11825471 | 3.39715561 | 0.0006809  | 0.01924594 |
| MED28    | 2405.7998  | 0.27533007 | 0.08109006 | 3.39536176 | 0.00068538 | 0.01929608 |
| PSMD13   | 2518.59775 | 0.28254025 | 0.08324859 | 3.3939346  | 0.00068896 | 0.01935873 |
| JAK1     | 13767.445  | 0.24957132 | 0.07371093 | 3.38581182 | 0.00070968 | 0.01978511 |
| FEZ1     | 1366.90585 | 0.51729692 | 0.15320799 | 3.37643573 | 0.00073432 | 0.02035265 |
| JAK3     | 121.933739 | 1.1065515  | 0.32855367 | 3.36794745 | 0.0007573  | 0.02086816 |
| CES2     | 2019.48313 | 0.34230454 | 0.10249657 | 3.33966823 | 0.00083879 | 0.02284234 |
| SDCBP    | 10934.3313 | 0.18941072 | 0.05671542 | 3.33966914 | 0.00083878 | 0.02284234 |
| SLC36A4  | 5395.85666 | 0.26085685 | 0.07852483 | 3.32196664 | 0.00089385 | 0.02398284 |
| C1orf43  | 9819.90225 | 0.18826902 | 0.05671266 | 3.31969989 | 0.00090114 | 0.02408785 |
| PLEKHG3  | 1626.27137 | 0.34379898 | 0.10369003 | 3.31564166 | 0.00091433 | 0.02434915 |
| STRADB   | 1185.00706 | 0.33971375 | 0.10268805 | 3.30821099 | 0.00093894 | 0.02495798 |
| ZC3H12A  | 1338.44488 | 0.46256091 | 0.13985327 | 3.30747309 | 0.00094142 | 0.02497731 |
| RNF5     | 1381.842   | 0.41611945 | 0.12613801 | 3.298922   | 0.00097057 | 0.02560795 |
| C9orf16  | 1769.06437 | 0.34770961 | 0.10583267 | 3.28546568 | 0.00101814 | 0.02661707 |
| SERPINA6 | 3254.39254 | 0.95344382 | 0.29040737 | 3.28312547 | 0.00102663 | 0.02678997 |
| CCDC85C  | 301.614549 | 0.67666335 | 0.20674368 | 3.27295794 | 0.00106428 | 0.02762105 |
| JUNB     | 8820.66187 | 0.22836964 | 0.06990795 | 3.26671939 | 0.00108802 | 0.02803307 |
| NAPA     | 5619.46249 | 0.20600984 | 0.06306171 | 3.26679771 | 0.00108771 | 0.02803307 |
| PIDD1    | 405.044079 | 0.65217637 | 0.19971548 | 3.26552745 | 0.0010926  | 0.0281006  |
| SLC9A1   | 585.72672  | 0.46124436 | 0.14135275 | 3.2630732  | 0.00110211 | 0.02824331 |
| RNF40    | 1792.38365 | 0.31589328 | 0.09702107 | 3.25592459 | 0.00113024 | 0.0286061  |
| HTRA1    | 1421.98959 | 0.3902832  | 0.11995869 | 3.25347985 | 0.00114001 | 0.02880084 |
| VAV1     | 12.8655338 | 4.41063374 | 1.35811652 | 3.2476107  | 0.00116378 | 0.02924622 |
| FXD2     | 3902.55946 | 0.43544939 | 0.13417225 | 3.24545047 | 0.00117265 | 0.02937615 |
| DDB2     | 2429.70461 | 0.28076652 | 0.08667865 | 3.23916597 | 0.0011988  | 0.02987605 |
| VWCE     | 48.7327902 | 2.00117204 | 0.61805043 | 3.23787823 | 0.00120422 | 0.02994611 |
| E2F7     | 74.1618985 | 1.61493155 | 0.49888789 | 3.237063   | 0.00120767 | 0.02997956 |
| TMEM70   | 2558.82703 | 0.27263469 | 0.08450578 | 3.22622535 | 0.00125435 | 0.03087649 |
| DUSP1    | 7145.86015 | 0.22192354 | 0.06878867 | 3.22616403 | 0.00125461 | 0.03087649 |
| VRK3     | 2126.58344 | 0.29980798 | 0.09301371 | 3.22326642 | 0.00126738 | 0.03108338 |
| SMARCD3  | 997.923986 | 0.42202891 | 0.13148759 | 3.20964835 | 0.00132897 | 0.03229733 |
| ST5      | 856.908531 | 0.50685778 | 0.15826471 | 3.20259501 | 0.00136195 | 0.03300599 |
| CD274    | 1331.50213 | 0.56960649 | 0.17799294 | 3.20016334 | 0.0013735  | 0.0331731  |
| VNN3     | 183.510458 | 0.98201331 | 0.30731719 | 3.1954389  | 0.00139618 | 0.03344337 |
| IL6R     | 4191.67334 | 0.35865048 | 0.11223474 | 3.19553895 | 0.0013957  | 0.03344337 |
| GFRA2    | 68.6830925 | 2.53140279 | 0.79254327 | 3.19402471 | 0.00140304 | 0.03347946 |
| GADD45B  | 3641.4143  | 0.43621943 | 0.13658772 | 3.19369428 | 0.00140465 | 0.03347946 |

|           |            |            |            |            |            |            |
|-----------|------------|------------|------------|------------|------------|------------|
| IPO4      | 2059.83822 | 0.29071463 | 0.09117551 | 3.18851669 | 0.00143005 | 0.03396422 |
| VPS41     | 4126.54679 | 0.24788034 | 0.07775642 | 3.18790829 | 0.00143306 | 0.03397923 |
| TRIM38    | 869.955777 | 0.40733172 | 0.1278605  | 3.18575095 | 0.00144379 | 0.03417684 |
| RHBDD3    | 995.400897 | 0.38772432 | 0.12176336 | 3.18424461 | 0.00145132 | 0.03424163 |
| TUBB1     | 318.090843 | 0.77221395 | 0.24290924 | 3.17902249 | 0.00147773 | 0.03467545 |
| SPHK1     | 881.39982  | 0.51706792 | 0.16266704 | 3.17868897 | 0.00147943 | 0.03467545 |
| CRIP2     | 8286.48912 | 0.18668904 | 0.0587158  | 3.17953654 | 0.00147511 | 0.03467545 |
| KIAA0825  | 63.1999993 | 1.89030315 | 0.59572109 | 3.17313452 | 0.00150803 | 0.0351725  |
| UNC5A     | 43.6277366 | 3.55659564 | 1.12366098 | 3.16518569 | 0.00154984 | 0.03597141 |
| ATP6V1B2  | 13786.3274 | 0.16896728 | 0.05345151 | 3.16113223 | 0.00157157 | 0.03629872 |
| CFAP221   | 154.836438 | 0.93546682 | 0.29600481 | 3.16030956 | 0.00157602 | 0.03634257 |
| CEBPD     | 2726.48865 | 0.33093648 | 0.10481237 | 3.15741824 | 0.00159173 | 0.0366457  |
| TAF9      | 1776.35025 | 0.33780289 | 0.10725773 | 3.14945041 | 0.00163578 | 0.03741844 |
| PPP2R5B   | 2085.28426 | 0.26893934 | 0.08545688 | 3.14707642 | 0.00164912 | 0.03766323 |
| SCMH1     | 880.610315 | 0.42638107 | 0.13561    | 3.1441713  | 0.00166558 | 0.0378566  |
| DDIT3     | 3330.37002 | 0.308854   | 0.09823051 | 3.14417581 | 0.00166555 | 0.0378566  |
| HIST1H2AC | 2953.12783 | 0.28675353 | 0.09132616 | 3.13988372 | 0.00169015 | 0.03829395 |
| STX1A     | 3223.44636 | 0.24108363 | 0.07684946 | 3.13708948 | 0.00170634 | 0.03853846 |
| LY6E      | 549.802397 | 0.50612511 | 0.16137603 | 3.13630906 | 0.00171089 | 0.03855843 |
| UNC5CL    | 2511.13886 | 0.38879027 | 0.12405637 | 3.13398068 | 0.00172452 | 0.03876508 |
| CPM       | 834.578121 | 0.48888763 | 0.15620149 | 3.12985251 | 0.00174894 | 0.03925217 |
| LMAN2L    | 2199.57222 | 0.29030618 | 0.09278805 | 3.12870228 | 0.0017558  | 0.03934428 |
| ZNF551    | 280.453737 | 0.78450632 | 0.25079313 | 3.12810135 | 0.0017594  | 0.03936302 |
| GPX1      | 4434.97413 | 0.24566851 | 0.07854962 | 3.12755821 | 0.00176265 | 0.03937411 |
| SLC16A9   | 939.974287 | 0.53247359 | 0.17033157 | 3.12610046 | 0.00177141 | 0.03950799 |
| SOCS3     | 950.009776 | 0.43510101 | 0.13932239 | 3.12297986 | 0.0017903  | 0.03986699 |
| LINGO2    | 457.75854  | 0.64524491 | 0.20680538 | 3.12005862 | 0.00180815 | 0.04013925 |
| DLC1      | 427.614201 | 0.67685219 | 0.21747939 | 3.11225893 | 0.00185662 | 0.0409449  |
| CCDC141   | 418.279873 | 0.54604015 | 0.17546761 | 3.11191422 | 0.00185879 | 0.0409449  |
| SOAT2     | 56.6039342 | 2.33888842 | 0.75460367 | 3.09949252 | 0.00193853 | 0.04220976 |
| OXTR      | 79.9700467 | 1.38874881 | 0.44808639 | 3.09928808 | 0.00193986 | 0.04220976 |
| FLOT2     | 4158.75197 | 0.30341497 | 0.09798191 | 3.09664274 | 0.00195726 | 0.0425234  |
| LMO2      | 492.4342   | 0.71326046 | 0.2305863  | 3.09324739 | 0.00197979 | 0.04294761 |
| TMEM35B   | 1604.46693 | 0.33453662 | 0.10836103 | 3.08724095 | 0.00202024 | 0.04369223 |
| CPED1     | 23.3514626 | 3.62477772 | 1.17760508 | 3.07809281 | 0.0020833  | 0.04484962 |
| PACRG     | 230.364452 | 0.752404   | 0.24514581 | 3.06921017 | 0.00214626 | 0.04572485 |
| RELB      | 794.313658 | 0.44440498 | 0.14491688 | 3.06661984 | 0.00216494 | 0.04598565 |
| PDCD4     | 6325.74695 | 0.21564541 | 0.0703843  | 3.06382834 | 0.00218524 | 0.04607408 |
| ORAI2     | 2477.95405 | 0.46531244 | 0.15196127 | 3.06204627 | 0.0021983  | 0.04628091 |
| MMP16     | 4734.25849 | 0.33446289 | 0.10940961 | 3.05697925 | 0.0022358  | 0.04686238 |
| FGG       | 633.191312 | 0.80937339 | 0.26532864 | 3.05045622 | 0.00228494 | 0.04761348 |
| SPRYD4    | 1223.01018 | 0.42227842 | 0.13862325 | 3.04623091 | 0.0023173  | 0.0480772  |
| HECTD3    | 1388.78677 | 0.30980086 | 0.10186127 | 3.04139981 | 0.00235481 | 0.04878454 |

|              |            |            |            |            |            |            |
|--------------|------------|------------|------------|------------|------------|------------|
| ADGRF5       | 28.1522454 | 3.8831301  | 1.27778226 | 3.03896071 | 0.00237396 | 0.04910997 |
| PHTF2        | 5271.96056 | 0.23671958 | 0.07797937 | 3.03566939 | 0.00240002 | 0.04957733 |
| CLTB         | 3083.65198 | 0.21643843 | 0.07137131 | 3.03256915 | 0.00242482 | 0.05001707 |
| FAM89A       | 492.314944 | 0.48766781 | 0.16098614 | 3.02925339 | 0.00245159 | 0.05022914 |
| COPS7A       | 2390.32675 | 0.25141939 | 0.08303893 | 3.02772909 | 0.00246399 | 0.05038539 |
| SEMA6D       | 1283.53841 | 0.41480217 | 0.13717012 | 3.0239979  | 0.00249458 | 0.05086809 |
| ALPK1        | 165.049481 | 0.90188477 | 0.29869749 | 3.01939183 | 0.00253283 | 0.05150082 |
| MGAM         | 47.9989772 | 3.16083518 | 1.0479506  | 3.01620628 | 0.00255959 | 0.05189716 |
| KIT          | 29.0588718 | 3.00347521 | 0.9966533  | 3.01356068 | 0.00258201 | 0.05212966 |
| MAATS1       | 575.601127 | 0.50260683 | 0.16724714 | 3.0051744  | 0.00265429 | 0.05328731 |
| INPP5D       | 49.2594509 | 1.89049374 | 0.62950084 | 3.00316319 | 0.00267189 | 0.05349029 |
| SLC35C2      | 1391.64557 | 0.32753578 | 0.10909594 | 3.00227283 | 0.00267972 | 0.05357186 |
| PITPNM1      | 2205.20055 | 0.25035905 | 0.08343574 | 3.00062122 | 0.0026943  | 0.05363789 |
| DDR1         | 5546.40817 | 0.22412809 | 0.07475645 | 2.99811057 | 0.00271659 | 0.05400643 |
| UBD          | 3098.09141 | 0.9655909  | 0.32445305 | 2.97605738 | 0.0029198  | 0.05709213 |
| MAP1LC3B     | 8766.93488 | 0.18113312 | 0.06092419 | 2.97309055 | 0.00294818 | 0.05756805 |
| OGFR         | 1113.25505 | 0.4933476  | 0.16624413 | 2.96760917 | 0.00300126 | 0.05828563 |
| SLC38A7      | 631.806522 | 0.44684685 | 0.15088397 | 2.96152622 | 0.00306118 | 0.05928812 |
| COX17        | 4843.24003 | 0.22111241 | 0.07471948 | 2.95923363 | 0.00308405 | 0.05965008 |
| XRN2         | 2724.21725 | 0.23362137 | 0.07914725 | 2.95173069 | 0.00315998 | 0.06087127 |
| SOAT1        | 5455.30334 | 0.26541234 | 0.0900844  | 2.94626309 | 0.00321639 | 0.06163261 |
| TNFRSF14     | 842.899282 | 0.4095894  | 0.13952745 | 2.93554715 | 0.0033296  | 0.06336895 |
| C17orf62     | 2033.97112 | 0.34902614 | 0.11940994 | 2.92292356 | 0.00346762 | 0.06512731 |
| TXNDC11      | 4527.6855  | 0.22278556 | 0.07624207 | 2.92208182 | 0.003477   | 0.06513218 |
| EI24         | 9846.89157 | 0.21637392 | 0.0740908  | 2.92038835 | 0.00349595 | 0.06531578 |
| DNAH7        | 261.694096 | 0.80814874 | 0.27696009 | 2.91792485 | 0.00352369 | 0.06566213 |
| LHFP         | 110.322479 | 1.61916644 | 0.55540044 | 2.91531356 | 0.00355331 | 0.0660065  |
| KLF10        | 6194.56112 | 0.24316789 | 0.08340698 | 2.91543793 | 0.0035519  | 0.0660065  |
| SPATS2       | 690.609235 | 0.47577823 | 0.16334698 | 2.91268453 | 0.00358336 | 0.06642719 |
| N4BP2L1      | 786.702912 | 0.49992022 | 0.17193272 | 2.90765021 | 0.00364155 | 0.06715703 |
| CMTM6        | 6971.13444 | 0.18782014 | 0.06465228 | 2.90508131 | 0.00367158 | 0.06762334 |
| BCAP29       | 1927.49564 | 0.28276312 | 0.09735576 | 2.90443118 | 0.00367921 | 0.06767662 |
| EBI3         | 101.448751 | 1.17852081 | 0.40641562 | 2.8997921  | 0.0037341  | 0.06836171 |
| SCN7A        | 12.3969277 | 4.95752527 | 1.71290481 | 2.89422112 | 0.003801   | 0.06919672 |
| AC084219.2   | 68.6687879 | 1.45809009 | 0.50385794 | 2.89385156 | 0.00380548 | 0.06919672 |
| KLHDC3       | 2113.11183 | 0.25531689 | 0.08831122 | 2.89110371 | 0.00383891 | 0.06962727 |
| IL18BP       | 1086.46958 | 0.53223212 | 0.18418417 | 2.88967358 | 0.00385642 | 0.06976748 |
| FAM21A       | 2903.82827 | 0.26758733 | 0.09259535 | 2.88985703 | 0.00385417 | 0.06976748 |
| RP11.691N7.6 | 26.5749429 | 4.42292633 | 1.53465538 | 2.88203227 | 0.00395119 | 0.07112147 |
| FGL1         | 614.738249 | 0.57994265 | 0.20143807 | 2.87901223 | 0.00398923 | 0.07158465 |
| EIF2B2       | 1257.51856 | 0.32702449 | 0.11359212 | 2.87893649 | 0.00399019 | 0.07158465 |
| MFSD14A      | 4372.2468  | 0.21104582 | 0.07335165 | 2.87717869 | 0.00401248 | 0.07186221 |
| RBPMS        | 590.077724 | 0.53919872 | 0.18744185 | 2.87661855 | 0.00401961 | 0.07189967 |

|         |            |            |            |            |            |            |
|---------|------------|------------|------------|------------|------------|------------|
| HSD11B1 | 146.756081 | 1.6278331  | 0.56628786 | 2.87456827 | 0.0040458  | 0.07227759 |
| GBP1    | 746.906197 | 0.74347721 | 0.2588653  | 2.87206207 | 0.00407803 | 0.07267139 |
| PSME1   | 8529.28125 | 0.23293003 | 0.08109409 | 2.87234277 | 0.00407441 | 0.07267139 |
| DYNLT1  | 3833.54193 | 0.23257882 | 0.08099434 | 2.8715442  | 0.00408472 | 0.07269981 |
| MTMR11  | 1287.51029 | 0.38363691 | 0.13364941 | 2.87047226 | 0.00409859 | 0.07276529 |
| SLC35D2 | 1442.4711  | 0.3611231  | 0.12582448 | 2.8700544  | 0.00410401 | 0.07277101 |
| DDX58   | 1043.04318 | 0.43915459 | 0.15315253 | 2.86743282 | 0.00413817 | 0.07328559 |
| SNAPC5  | 549.860499 | 0.43183908 | 0.15071523 | 2.86526503 | 0.0041666  | 0.07369777 |
| PDP2    | 195.506133 | 0.8160659  | 0.28503002 | 2.86308752 | 0.00419535 | 0.07411433 |
| H3F3B   | 26474.9913 | 0.14932853 | 0.05217167 | 2.8622534  | 0.00420641 | 0.07421782 |
| KCTD2   | 634.786633 | 0.41875651 | 0.14635221 | 2.86129272 | 0.00421917 | 0.07428738 |
| ACADS   | 588.817793 | 0.51730269 | 0.18089601 | 2.85966886 | 0.00424084 | 0.07445718 |
| PCDHGC3 | 1314.67996 | 0.3329712  | 0.11647861 | 2.85864674 | 0.00425452 | 0.07460572 |
| GTF3C1  | 2447.75252 | 0.27724931 | 0.09712198 | 2.85465046 | 0.00430842 | 0.07527346 |
| SMTN    | 257.365453 | 0.81237349 | 0.28469523 | 2.8534847  | 0.00432426 | 0.07534455 |
| TAP2    | 572.520159 | 0.66582526 | 0.23343941 | 2.85224023 | 0.00434123 | 0.07547709 |
| ANK1    | 76.5431749 | 1.35077783 | 0.47485639 | 2.84460283 | 0.00444668 | 0.07684256 |
| PGAM1   | 9368.50782 | 0.15168499 | 0.05335227 | 2.84308423 | 0.00446793 | 0.07702316 |
| INPP5K  | 1454.90403 | 0.3614665  | 0.12782455 | 2.82783307 | 0.00468642 | 0.08030494 |
| SAMSN1  | 370.786228 | 0.58843021 | 0.20821899 | 2.82601607 | 0.00471309 | 0.08040733 |
| PSME3   | 3837.99149 | 0.22097527 | 0.0781816  | 2.82643574 | 0.00470692 | 0.08040733 |
| CLTA    | 4660.08069 | 0.19591498 | 0.06933796 | 2.82550843 | 0.00472057 | 0.08040733 |
| CDC6    | 48.5237611 | 1.5289208  | 0.54359058 | 2.81263298 | 0.00491377 | 0.08310327 |
| ANKRA2  | 874.074031 | 0.40249938 | 0.14316701 | 2.8113976  | 0.00493268 | 0.08332433 |
| ACOT8   | 777.703384 | 0.39167505 | 0.13955302 | 2.80663962 | 0.00500612 | 0.08416652 |
| ARMC10  | 1387.07246 | 0.2801072  | 0.09986552 | 2.80484403 | 0.00503409 | 0.08453723 |
| IRF7    | 741.200327 | 0.42939886 | 0.15311298 | 2.80445751 | 0.00504013 | 0.0845392  |
| C7orf73 | 1808.71351 | 0.26633845 | 0.09502844 | 2.80272352 | 0.00506731 | 0.08471128 |
| RRAGB   | 947.279573 | 0.41692954 | 0.14914527 | 2.79545941 | 0.0051826  | 0.08611926 |
| GUCD1   | 1386.79979 | 0.35616723 | 0.12761071 | 2.79104486 | 0.00525382 | 0.08689805 |
| SLC31A2 | 477.846773 | 0.62357828 | 0.22345165 | 2.79066318 | 0.00526002 | 0.08689988 |
| SYNGR2  | 4966.79766 | 0.18043997 | 0.06475969 | 2.78630072 | 0.00533134 | 0.08797634 |
| NADK    | 1123.06485 | 0.30502718 | 0.10967137 | 2.78128366 | 0.00541444 | 0.08893639 |
| DDR2    | 233.127864 | 0.75749962 | 0.27283822 | 2.77636915 | 0.00549698 | 0.08977555 |
| GNG11   | 278.273654 | 1.1325215  | 0.40843136 | 2.77285636 | 0.00555666 | 0.09033693 |
| IFT122  | 1481.67581 | 0.41668532 | 0.1502645  | 2.77301233 | 0.005554   | 0.09033693 |
| RPS6KB2 | 1119.3234  | 0.30997106 | 0.11192346 | 2.76949143 | 0.00561439 | 0.09106793 |
| SYTL5   | 188.029401 | 1.24767911 | 0.45141581 | 2.76392429 | 0.00571108 | 0.09221713 |
| FAT1    | 460.768477 | 0.47953642 | 0.17345716 | 2.76458122 | 0.00569959 | 0.09221713 |
| EGFL7   | 1267.40453 | 0.39855576 | 0.14429043 | 2.76217729 | 0.00574173 | 0.09260728 |
| EDIL3   | 16523.7771 | 0.25219082 | 0.09135633 | 2.76051847 | 0.00577097 | 0.09286902 |
| IFT52   | 730.033805 | 0.40279457 | 0.14602815 | 2.758335   | 0.00580966 | 0.0933864  |
| ORAI1   | 525.654994 | 0.50852506 | 0.18450847 | 2.75610693 | 0.00584939 | 0.09391918 |



|          |            |            |            |            |            |            |
|----------|------------|------------|------------|------------|------------|------------|
| BPIFA1   | 308.497353 | 1.07375781 | 0.38988912 | 2.75400818 | 0.00588703 | 0.09431141 |
| ABCG1    | 2954.00715 | 0.35325982 | 0.12835744 | 2.75215701 | 0.00592041 | 0.09473988 |
| JKAMP    | 3571.375   | 0.22822609 | 0.0830686  | 2.74744113 | 0.00600623 | 0.09568405 |
| MORN2    | 654.917102 | 0.41116957 | 0.14972209 | 2.7462185  | 0.00602866 | 0.09582749 |
| SLC43A2  | 1158.30751 | 0.50447975 | 0.18386493 | 2.74375189 | 0.00607414 | 0.0963359  |
| TYMP     | 2888.52407 | 0.40815893 | 0.14887243 | 2.74166908 | 0.00611279 | 0.09684124 |
| C6orf120 | 1288.98023 | 0.29440354 | 0.10764359 | 2.73498446 | 0.00623832 | 0.0981762  |
| RRM2B    | 6376.65581 | 0.25809074 | 0.0943471  | 2.73554502 | 0.00622771 | 0.0981762  |
| PCYOX1L  | 484.751898 | 0.43328358 | 0.15862569 | 2.73148426 | 0.00630498 | 0.09911588 |
| SPON2    | 492.28765  | 0.49365861 | 0.18081262 | 2.73022207 | 0.00632917 | 0.09938673 |
| HS3ST1   | 280.487888 | 0.81615517 | 0.29897422 | 2.72985133 | 0.00633629 | 0.09938747 |
| CASP4    | 953.871705 | 0.39773898 | 0.14571889 | 2.72949505 | 0.00634314 | 0.09938747 |
| B4GALT5  | 1138.00992 | 0.35429274 | 0.12983203 | 2.72885464 | 0.00635547 | 0.09938871 |
| ATP6V1E1 | 4291.51306 | 0.23393007 | 0.08572942 | 2.72870254 | 0.0063584  | 0.09938871 |
| AK2      | 6966.91803 | 0.16437744 | 0.06026617 | 2.72752411 | 0.00638116 | 0.09954609 |
