# Supplementary material
Source: publisher figshare collection journal article supplement (https://diabetesjournals.figshare.com/articles/dataset/_/24615675)
Supplement: Supplementary file 6 [file 2]

## Supplemental Figure S1

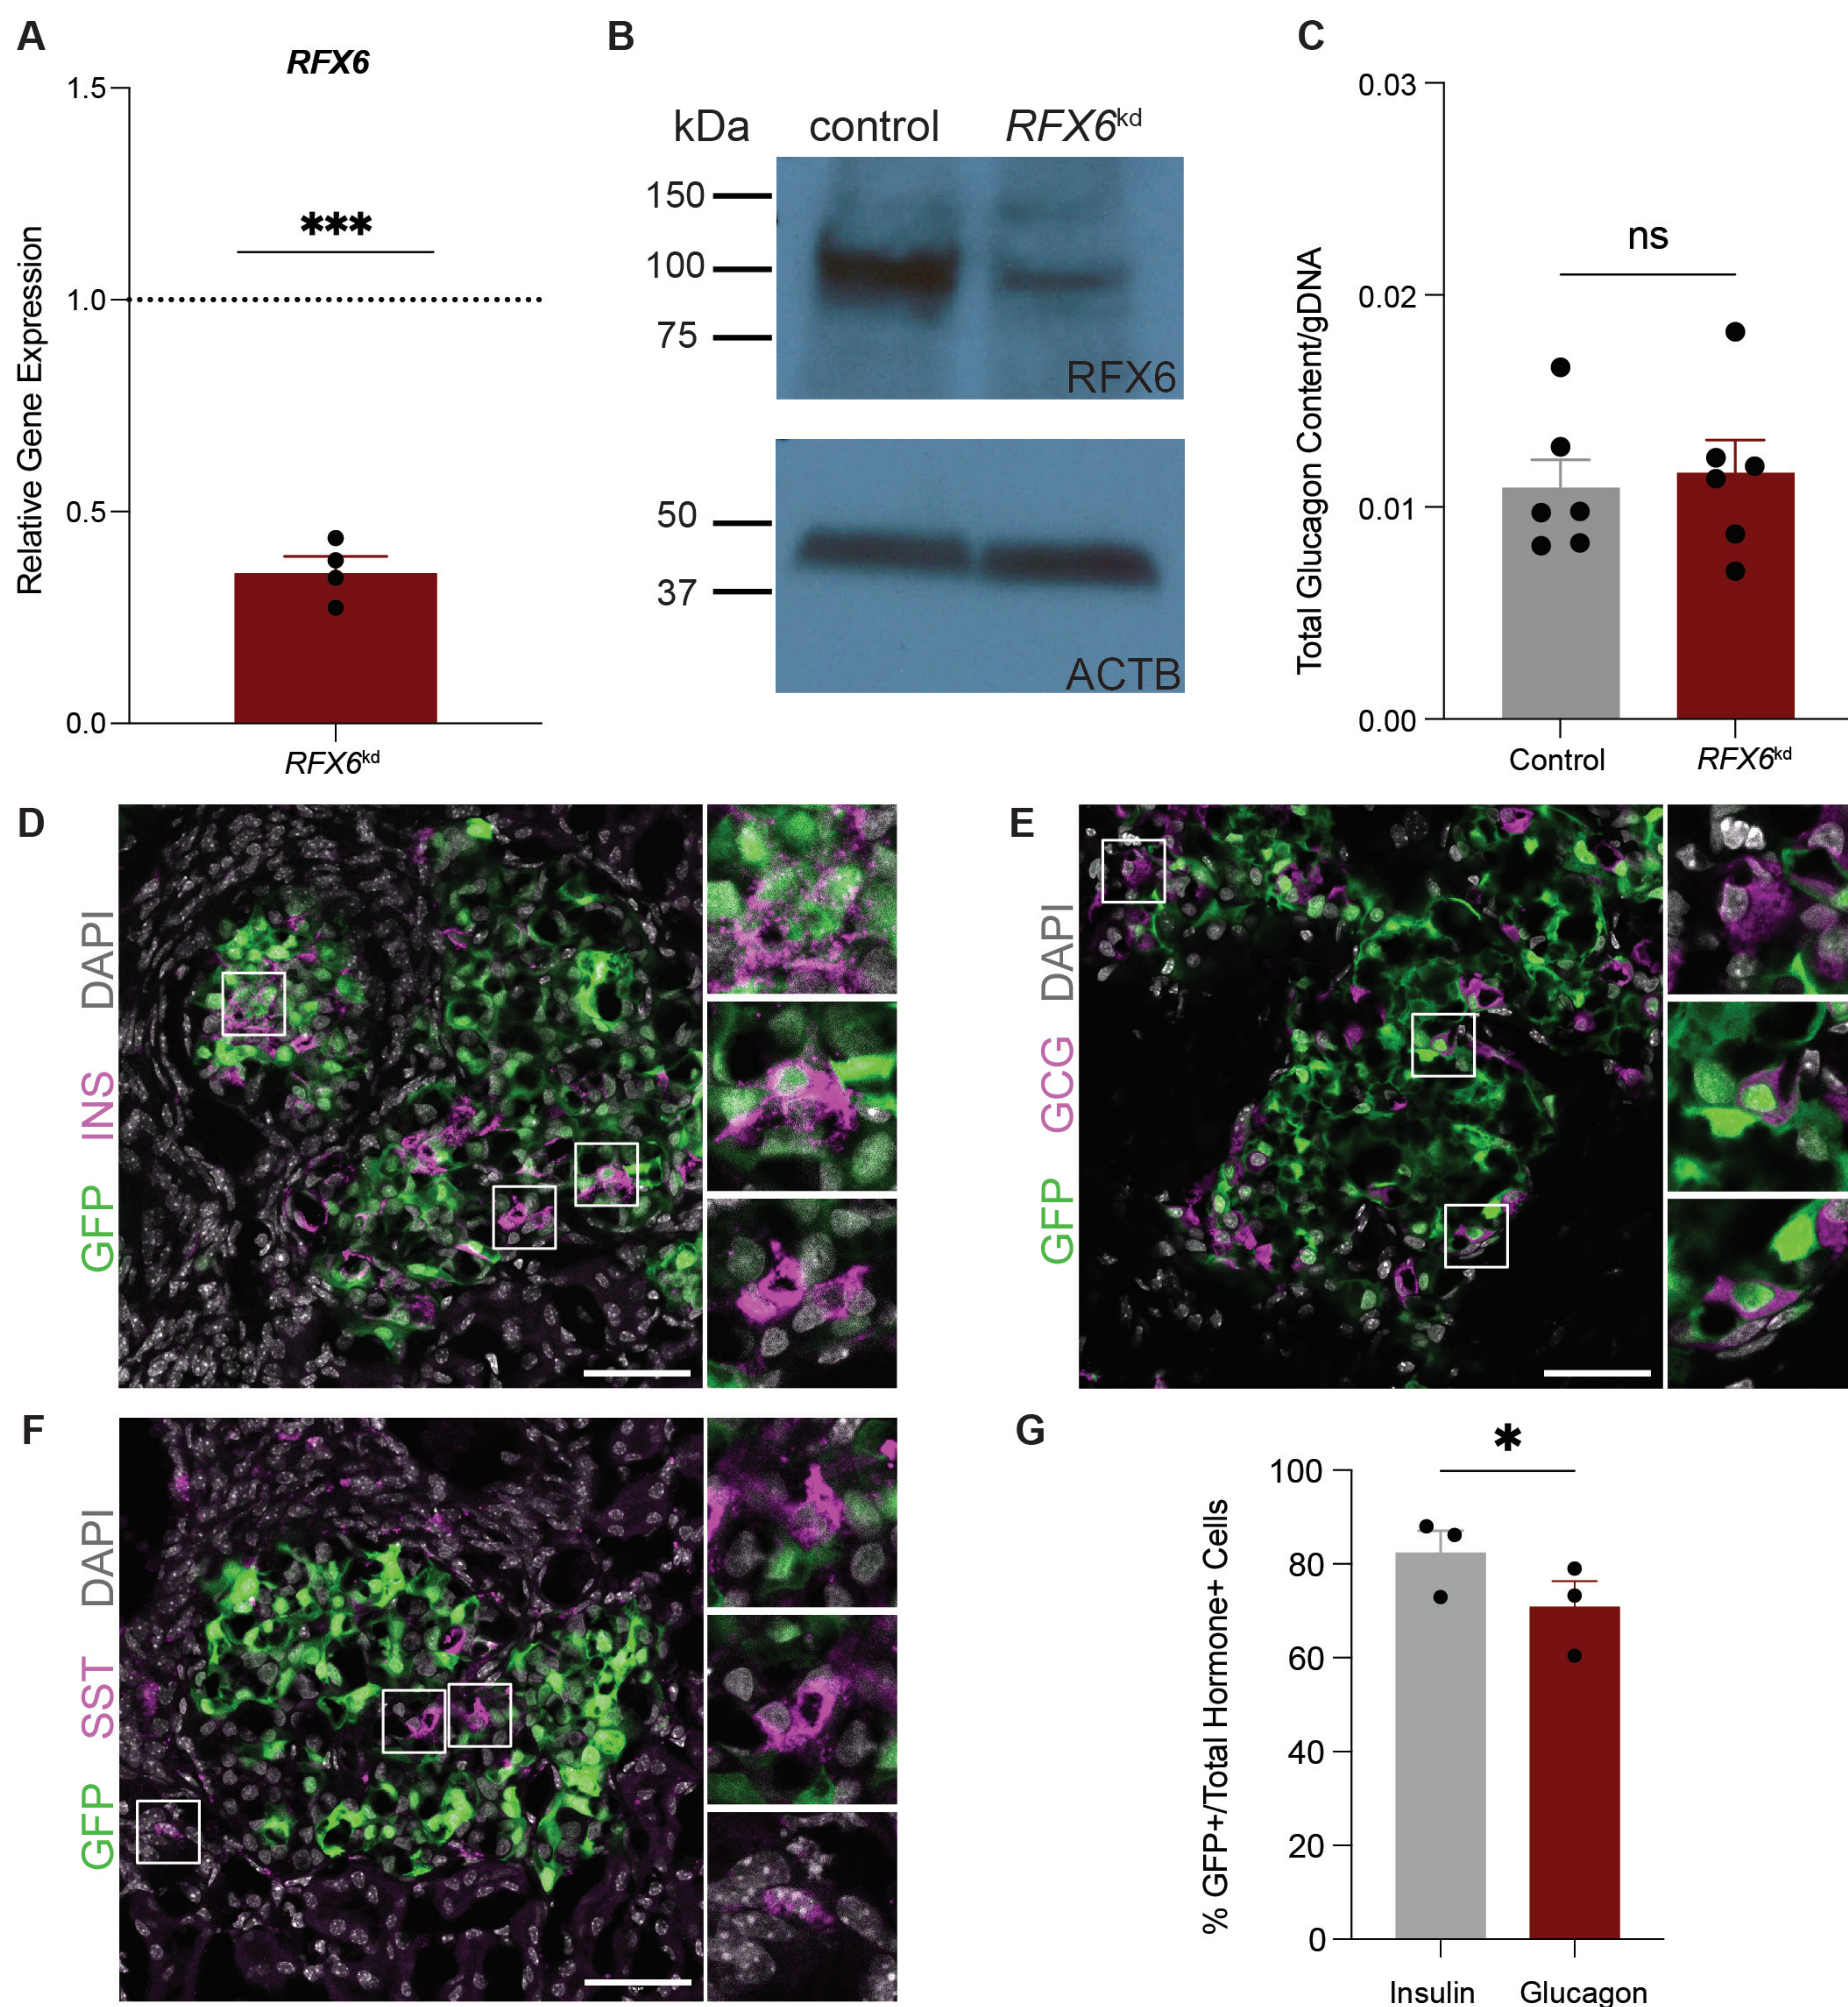

**Figure S1. Lentiviral shRNA-mediated suppression of *RFX6* decreases mRNA and protein expression, but does not affect glucagon content.** (A) Assessment of *RFX6* expression in whole pseudoislets compared to control after lentiviral transduction by qRT-PCR; n=4 donors. (B) Assessment of RFX6 and ACTB protein expression after lentiviral transduction by Western. (C) Assessment of total glucagon content, normalized to gDNA; n=6 donors. (D-F) GFP<sup>+</sup> cells and staining for (D) insulin, (E) glucagon, or (F) somatostatin (magenta) and DAPI (gray) in a representative histological section of kidney capsule-transplanted whole *RFX6<sup>kd</sup>* pseudoislet grafts; scale=50μm. (G) Quantification of GFP and hormone-positive cells via ImageJ; n=3 donors. (F) Data presented as mean values ± SEM. Two-tailed t-tests used to generate P-values: (\*) P < 0.05, (\*\*) P < 0.01, (\*\*\*) P < 0.0001.
