# Supplementary material
Source: publisher figshare collection journal article supplement (https://diabetesjournals.figshare.com/articles/dataset/_/24615675)
Supplement: Supplementary file 7 [file 2]

**Supplemental Table S7**

| <b>CUT&amp;RUN + aDEGs + bDEGs</b> | <b>CUT&amp;RUN + aDEGs</b> | <b>CUT&amp;RUN + bDEGs</b> |
|------------------------------------|----------------------------|----------------------------|
| ACLY                               | AAED1                      | ABCC8                      |
| ADAMTS2                            | ABCB10                     | ANXA4                      |
| ADAMTSL2                           | ABCG1                      | APP                        |
| ALDH1A1                            | ABCG2                      | CACNA2D1                   |
| APCDD1L                            | ABHD15                     | CAPN13                     |
| BAIAP3                             | ACAA2                      | CASR                       |
| CACNA1A                            | ACER2                      | CD9                        |
| CACNA1C                            | ACHE                       | CDON                       |
| CAPN2                              | ADCY2                      | CHDH                       |
| CCNY                               | AEN                        | COL9A2                     |
| CLCN4                              | AFAP1                      | CTGF                       |
| CNTN1                              | AGFG2                      | CXCR4                      |
| CPD                                | AGT                        | DCTN1                      |
| CTSE                               | AHI1                       | DDX60                      |
| DDX58                              | AHSA1                      | DNM3                       |
| DNAJC6                             | AK2                        | DUSP2                      |
| DSP                                | ALDH1A3                    | ESYT1                      |
| EIF4EBP2                           | ALDH1B1                    | FOS                        |
| HSPH1                              | ALDH4A1                    | FTCD                       |
| IDS                                | ALDH6A1                    | GCK                        |
| ISG15                              | ALDH7A1                    | GPRIN1                     |
| KCNA5                              | ALDOB                      | HDAC6                      |
| KCTD12                             | ANAPC15                    | HILPDA                     |
| KLHDC8A                            | ANK1                       | IFITM3                     |
| MAN1A1                             | ANKRD36C                   | IGSF1                      |
| MAP1A                              | ANKRD37                    | IL17RB                     |
| MMRN1                              | APLP2                      | LAMP3                      |
| MX1                                | APOBEC2                    | LRP5                       |
| NCAM1                              | APOH                       | NACAD                      |
| NFASC                              | APOL6                      | NCKAP5                     |
| NFIC                               | APOLD1                     | NEO1                       |
| PARP12                             | ARF1                       | OLFM4                      |
| PHLDA3                             | ARHGAP1                    | PCSK9                      |
| PROS1                              | ARHGEF9                    | PFKP                       |
| PRSS23                             | ARL4C                      | RAB15                      |
| PSME2                              | ARRDC4                     | ROBO1                      |
| PTPRN2                             | ASPH                       | ROR1                       |
| RAP1GAP2                           | ASXL3                      | RSAD2                      |
| RBCK1                              | ATF3                       | SERPINA3                   |
| RFX6                               | ATP2B1                     | SEZ6                       |
| RPS27L                             | ATP5G2                     | SLC16A2                    |

|          |          |         |
|----------|----------|---------|
| SEZ6L    | ATP6V1B2 | SLC34A2 |
| SLC30A8  | ATP8A1   | SLC7A14 |
| SLC5A1   | AZI2     | SLIT1   |
| STAT1    | B4GALT5  | SOX9    |
| SUN1     | BAG3     | SPP1    |
| TMEM132B | BAMBI    | SRC     |
| TMEM132D | BCAP29   | STAT6   |
| TMEM64   | BIRC3    | SYNPO   |
| USP25    | BMP3     | TACSTD2 |
| VIM      | BRD7     | TINAGL1 |
| WFS1     | BTG1     | USP18   |
|          | BTG2     | VCAM1   |
|          | BTG3     | WNT9A   |
|          | C15orf48 |         |
|          | C1orf21  |         |
|          | C1orf43  |         |
|          | C21orf91 |         |
|          | C2orf70  |         |
|          | C3orf80  |         |
|          | C5orf15  |         |
|          | C6orf106 |         |
|          | C6orf120 |         |
|          | C7orf73  |         |
|          | C8B      |         |
|          | CACNA2D2 |         |
|          | CACNB2   |         |
|          | CADPS    |         |
|          | CALCOCO2 |         |
|          | CALY     |         |
|          | CAMK2G   |         |
|          | CASP3    |         |
|          | CASP7    |         |
|          | CBFB     |         |
|          | CCDC141  |         |
|          | CCDC85C  |         |
|          | CD14     |         |
|          | CD164    |         |
|          | CD55     |         |
|          | CDC6     |         |
|          | CDCP1    |         |
|          | CDH1     |         |
|          | CDH2     |         |
|          | CDIPT    |         |

CDKN1A  
CEBPD  
CELSR2  
CES2  
CETN2  
CHGA  
CHKA  
CIB1  
CITED4  
CLCN5  
CLDN7  
CLTA  
CLTB  
CMTM6  
CNIH2  
COBL  
COMT  
COPS7A  
COX11  
CPA4  
CPE  
CPM  
CPSF6  
CRB1  
CREB3L2  
CRIM1  
CRIP2  
CRTAC1  
CSRNP3  
CTNND2  
CTSB  
CTSO  
CXCL1  
CXorf57  
CYP4F3  
CYP4V2  
CYS1  
CYSTM1  
DDB2  
DDX24  
DENND2D  
DERL1  
DHRS2

DIP2C  
DLC1  
DNAH7  
DPP6  
DPY19L1  
DSCAML1  
DST  
DUSP1  
DYNLT1  
DZIP3  
E2F7  
ECI2  
EDIL3  
EFR3A  
EGFL7  
EI24  
EIF2B2  
EIF4B  
ELL2  
ELN  
ELOVL4  
EMC10  
ENPP1  
ENPP4  
EPCAM  
EPG5  
EPHX2  
ERAP1  
ERRFI1  
EVA1A  
EXTL3  
F13A1  
F2  
F3  
FAM101A  
FAM110C  
FAM163A  
FAM210A  
FAM213A  
FAM21A  
FAM46A  
FAM46C  
FAM84B

FAS  
FAT1  
FAT3  
FBLN2  
FBN1  
FEV  
FEZ1  
FFAR2  
FFAR3  
FGF14  
FGF18  
FGFR1  
FGG  
FGL1  
FKBP2  
FLNB  
FLOT2  
FLRT3  
FNIP2  
FOXP2  
FOXP2  
FRK  
FUK  
FXYD2  
FXYD3  
GADD45B  
GADD45G  
GALNT13  
GCH1  
GCLM  
GCNT1  
GCNT3  
GFRA2  
GGA2  
GIT1  
GLI2  
GLRX  
GLS  
GLT8D2  
GLUL  
GNG2  
GOLM1  
GOSR2

GPB1  
GPHN  
GPR119  
GPR148  
GPX1  
GPX3  
GPX4  
GRAMD3  
GRSF1  
GTF3C1  
GTPBP4  
GUCD1  
H3F3B  
HABP2  
HCN4  
HECTD3  
HEPACAM2  
HERC1  
HEXB  
HHLA2  
HIF1A  
HINT3  
HIP1R  
HIPK2  
HIST1H2AC  
HIST1H2BC  
HLTF  
HOMER2  
HPSE  
HS3ST1  
HSD11B1  
HSP90AA1  
HSP90AB1  
HSP90B1  
HSPA5  
HSPA8  
HTRA1  
ICAM1  
ID1  
ID4  
IFIH1  
IFNB1  
IFT122

IFT52  
IGFBPL1  
IKBKAP  
IL12A  
IL18BP  
IL1R2  
IL6R  
IPO4  
IRF2  
IRF6  
IRF7  
ISL1  
ITGB1  
ITGB8  
IVNS1ABP  
JAK1  
JAK2  
JKAMP  
JOSD2  
JUNB  
KAT6B  
KCNIP1  
KCNK17  
KCNMA1  
KCTD2  
KCTD3  
KIAA0922  
KIAA1109  
KIAA1147  
KIAA1549L  
KIF12  
KIF19  
KIF3B  
KIT  
KL  
KLF10  
KLF11  
KLHDC3  
KMO  
KRT13  
KSR2  
LAPTM4A  
LDB2

LDHA  
LDLRAD1  
LHFP  
LINGO2  
LIPG  
LMAN1  
LMBRD1  
LMO2  
LNPEP  
LONRF2  
LOXL4  
LPCAT1  
LRP11  
LRRC49  
LRRFIP1  
LRRN1  
LRRTM2  
LSAMP  
MACC1  
MACF1  
MAFB  
MAGED1  
MAGI1  
MAP1LC3B  
MAP3K12  
MAP3K4  
MAP4K5  
MAP6  
MAP7  
MAPK4  
MAPK6  
MAPRE1  
MAPRE2  
MATN2  
MBD2  
MBD4  
MBOAT2  
MDH2  
ME3  
MED28  
MEIS2  
MEP1B  
METTL9



MFSD6  
MGAT4A  
MGST3  
MLXIPL  
MLYCD  
MMP16  
MOB1B  
MPPE1  
MS4A8  
MTSS1  
MUC13  
MYO10  
MYO1B  
MYO5B  
MYO5C  
NAAA  
NAPA  
NBAS  
NBEAL2  
NCALD  
NCF2  
NDFIP1  
NDUFV2  
NECAB2  
NELFCD  
NELL2  
NET1  
NFKBIA  
NGRN  
NKRF  
NLN  
NOL4  
NOMO1  
NPNT  
NPTX2  
NR0B1  
NRCAM  
NRP2  
NT5DC3  
NTRK2  
NUCB2  
NUDT4  
OCRL

OGFR  
OPN3  
ORAI1  
OTOGL  
OTUD3  
OXTR  
P4HTM  
PACRG  
PAK3  
PAM  
PANX1  
PAPPA2  
PARM1  
PARP10  
PAX6  
PCDHGC3  
PCP4  
PCSK1  
PCSK2  
PCYOX1  
PCYOX1L  
PDCD4  
PDE4DIP  
PDE8A  
PDE8B  
PDIA5  
PDIA6  
PDK4  
PDP2  
PEG10  
PELI3  
PEMT  
PERP  
PGAM1  
PHKA1  
PHTF2  
PID1  
PIGT  
PIK3IP1  
PIM2  
PITPNM1  
PLCE1  
PLEKHA1

PLEKHG3  
PLK2  
PLXNA3  
PMM2  
PPARGC1B  
PPL  
PPP2R2B  
PPP2R5B  
PRDX4  
PRKCE  
PRKCI  
PSAT1  
PSENEN  
PSME1  
PTGDR2  
PTGER4  
PTK7  
PTP4A3  
PTPRN  
PTPRT  
PUM2  
QDPR  
RAB26  
RAB3B  
RAB3C  
RAPGEF4  
RARRES3  
RBP4  
RBPMS  
RCAN3  
RCE1  
RDH10  
REEP4  
RELB  
RFX3  
RFX5  
RGPD6  
RGS9  
RHBDD3  
RHBDF2  
RHPN1  
RIMBP2  
RIMKLB

RNASET2  
RNF170  
RNF213  
RNF40  
RPL3  
RPS25  
RRAS  
RRM2B  
RSPH1  
SAMSN1  
SCAMP3  
SCARB2  
SCG3  
SCGN  
SCMH1  
SDC2  
SDCBP  
SDF2L1  
SEC24D  
SEL1L3  
SEMA4B  
SEMA6D  
SEPHS1  
SERPINA4  
SERPINA6  
SERPINB1  
SESN1  
SGK2  
SGMS2  
SHISA5  
SHROOM1  
SHROOM3  
SIGLEC15  
SIPA1L1  
SLC12A7  
SLC14A1  
SLC16A12  
SLC16A9  
SLC22A16  
SLC22A17  
SLC22A4  
SLC24A3  
SLC29A1

SLC29A4  
SLC30A1  
SLC31A2  
SLC35A4  
SLC35C2  
SLC36A4  
SLC38A8  
SLC39A1  
SLC40A1  
SLC43A2  
SLC5A3  
SLC6A16  
SLC7A8  
SLC9A1  
SLC05A1  
SMARCA2  
SMARCD3  
SMOC1  
SMPD3  
SND1  
SNED1  
SNX33  
SOAT1  
SOAT2  
SOCS3  
SOD2  
SORT1  
SPATS2  
SPC25  
SPHK1  
SPINT2  
SPON2  
SPPL2A  
SPRED3  
SPRYD4  
SPTAN1  
SPTBN1  
SRRM2  
SSR1  
SSTR2  
SSU72  
ST3GAL6  
ST5

STAP2  
STAT4  
STK39  
STRADB  
STX1A  
STXBP6  
SUMF2  
SYDE2  
SYNGR2  
SYT13  
SYT4  
SYTL2  
TAGLN3  
TANC2  
TBC1D23  
TEAD1  
TECR  
TEF  
TGFB3  
TGOLN2  
THUMPD1  
TIAM1  
TIPARP  
TM9SF2  
TMBIM6  
TMCO3  
TMED10  
TMED3  
TMEM163  
TMEM200A  
TMEM45B  
TMEM59  
TMEM70  
TMEM98  
TMSB10  
TMSB4X  
TMX1  
TNFRSF14  
TNFRSF1A  
TNFRSF21  
TNRC6B  
TNS3  
TOM1L2

TOX3  
TPPP3  
TPST2  
TRIB3  
TRIO  
TRIP12  
TRNP1  
TRPC4  
TSPAN1  
TSPAN2  
TSPYL2  
TTC3  
TTLL12  
TTLL6  
TUBA1A  
TUBA1B  
TUSC3  
UBE2J1  
UBR2  
UCN3  
UCP2  
UGGT1  
UNC5A  
UNC5CL  
USH2A  
USO1  
USP38  
USP45  
UTRN  
VMA21  
VNN3  
VPS41  
VRK3  
VWCE  
WARS  
WDFY2  
WDR37  
XRCC6  
XRN2  
YIPF2  
YTHDF3  
ZC3H12A  
ZC3H12C

ZCCHC18  
ZFP36L1  
ZKSCAN1  
ZNF107  
ZNF169  
ZNF511  
ZNF618  
ZNRF1
