# Supplementary material
Source: publisher figshare collection journal article supplement (https://diabetesjournals.figshare.com/articles/dataset/_/24615675)
Supplement: Supplementary file 8 [file 2]

**Supplemental Table S2**

| <b>Source ID</b> | <b>Donor Prep Source</b>                             | <b>Age</b> | <b>Sex</b> | <b>BMI</b> | <b>Purity</b> |
|------------------|------------------------------------------------------|------------|------------|------------|---------------|
| R391             | University of Alberta                                | 67         | M          | 24.5       | 95            |
| SIRC - Pilot 2   | Stanford University                                  | 53         | F          | 27.4       | 70            |
| SAMN17528599     | IIDP: University of Pennsylvania                     | 60         | M          | 29.9       | 82            |
| SIRC020221       | Stanford University                                  | 44         | F          | 23.8       | 65            |
| SAMN17928660     | IIDP: Southern California Islet Cell Resource Center | 62         | M          | 25.9       | 90            |
| SAMN18092805     | IIDP: Southern California Islet Cell Resource Center | 56         | M          | 21.6       | 88            |
| SAMN18479112     | IIDP: Southern California Islet Cell Resource Center | 44         | M          | 24.4       | 80            |
| R403             | University of Alberta                                | 35         | F          | 37.2       | 95            |
| SAMN18875704     | IIDP: The Scharp-Lacy Research Institute             | 37         | M          | 28.4       | 55            |
| rHIP-147         | University of California San Francisco               | 47         | M          | 18.7       | 90            |
| SAMN19591106     | IIDP: Southern California Islet Cell Resource Center | 61         | M          | 29.3       | 68            |
| SIRC - Pilot 3   | Stanford University                                  | 16         | M          | 35         | 90            |
| R407             | University of Alberta                                | 58         | M          | 27.4       | 90            |
| SAMN19897466     | IIDP: University of Pennsylvania                     | 28         | F          | 24.7       | 79            |
| SAMN20064638     | IIDP: Southern California Islet Cell Resource Center | 66         | M          | 29.9       | 90            |
| R410             | University of Alberta                                | 59         | F          | 26.4       | 80            |
| SAMN20478103     | IIDP: University of Pennsylvania                     | 30         | M          | 25.4       | 86            |
| R412             | University of Alberta                                | 42         | M          | 29.9       | 85            |
| SIRC - Pilot 4   | Stanford University                                  | 15         | F          | 22.9       | 62.5          |
| SAMN21855451     | IIDP: University of Pennsylvania                     | 55         | M          | 35.1       | 86            |
| R415             | University of Alberta                                | 32         | M          | 26.6       | 80            |
| rHIP-150         | University of California San Francisco               | 36         | F          | 27.9       | 90            |
| R430             | University of Alberta                                | 49         | M          | 24.4       | 90            |
| SAMN25860453     | IIDP: University of Pennsylvania                     | 44         | M          | 25.8       | 90            |
| SAMN26177826     | IIDP: The Scharp-Lacy Research Institute             | 52         | M          | 25.1       | 95            |
| R440             | University of Alberta                                | 35         | F          | 26.7       | 95            |
| rHIP-152         | University of California San Francisco               | 32         | F          | 29.1       | 90            |
| SAMN28673685     | IIDP: Southern California Islet Cell Resource Center | 37         | M          | 28.4       | 81            |
| SAMN28867622     | IIDP: Southern California Islet Cell Resource Center | 36         | M          | 29.6       | 86            |
| R450             | University of Alberta                                | 66         | F          | 21.9       | 90            |
| SAMN29657580     | IIDP: University of Pennsylvania                     | 40         | M          | 23         | 90            |
| SAMN29771427     | IIDP: University of Miami                            | 44         | M          | 27.9       | 59            |
| R454             | University of Alberta                                | 66         | M          | 29.6       | 95            |
| rHIP-157         | University of California San Francisco               | 56         | F          | 24.9       | 90            |
| R464             | University of Alberta                                | 60         | M          | 27.7       | 85            |
| R468             | University of Alberta                                | 66         | F          | 27.4       | 95            |
| SAMN32641505     | IIDP: Southern California Islet Cell Resource Center | 16         | M          | 29.5       | 71.5          |
| SAMN32875450     | IIDP: Imagine Pharma                                 | 60         | F          | 25.2       | 75            |
| AKAS038          | IIDP: Imagine Pharma                                 | 49         | F          | 28.5       | 65            |

**HbA1c (%)    Diabetes Status**

4.9 Non-diabetic  
5.6 Non-diabetic  
5.8 Non-diabetic  
5.3 Non-diabetic  
5.1 Non-diabetic  
5.1 Non-diabetic  
5.3 Non-diabetic  
5.7 Non-diabetic  
5.6 Non-diabetic  
5.7 Non-diabetic  
5.9 Non-diabetic  
5.5 Non-diabetic  
5.5 Non-diabetic  
5 Non-diabetic  
5.8 Non-diabetic  
4.8 Non-diabetic  
5.8 Non-diabetic  
4.8 Non-diabetic  
5.3 Non-diabetic  
5.1 Non-diabetic  
5.9 Non-diabetic  
5.6 Non-diabetic  
4.8 Non-diabetic  
6 Non-diabetic  
4.2 Non-diabetic  
3.8 Non-diabetic  
5 Non-diabetic  
5.3 Non-diabetic  
5.4 Non-diabetic  
4.3 Non-diabetic  
5.2 Non-diabetic  
5.3 Non-diabetic  
5.4 Non-diabetic  
5.5 Non-diabetic  
5.3 Non-diabetic  
5.4 Non-diabetic  
5.4 Non-diabetic  
5.7 Non-diabetic  
5.2 Non-diabetic
