# Supplementary material
Source: publisher figshare collection journal article supplement (https://diabetesjournals.figshare.com/articles/dataset/_/24615675)
Supplement: Supplementary file 9 [file 2]

## Supplemental Figure S5

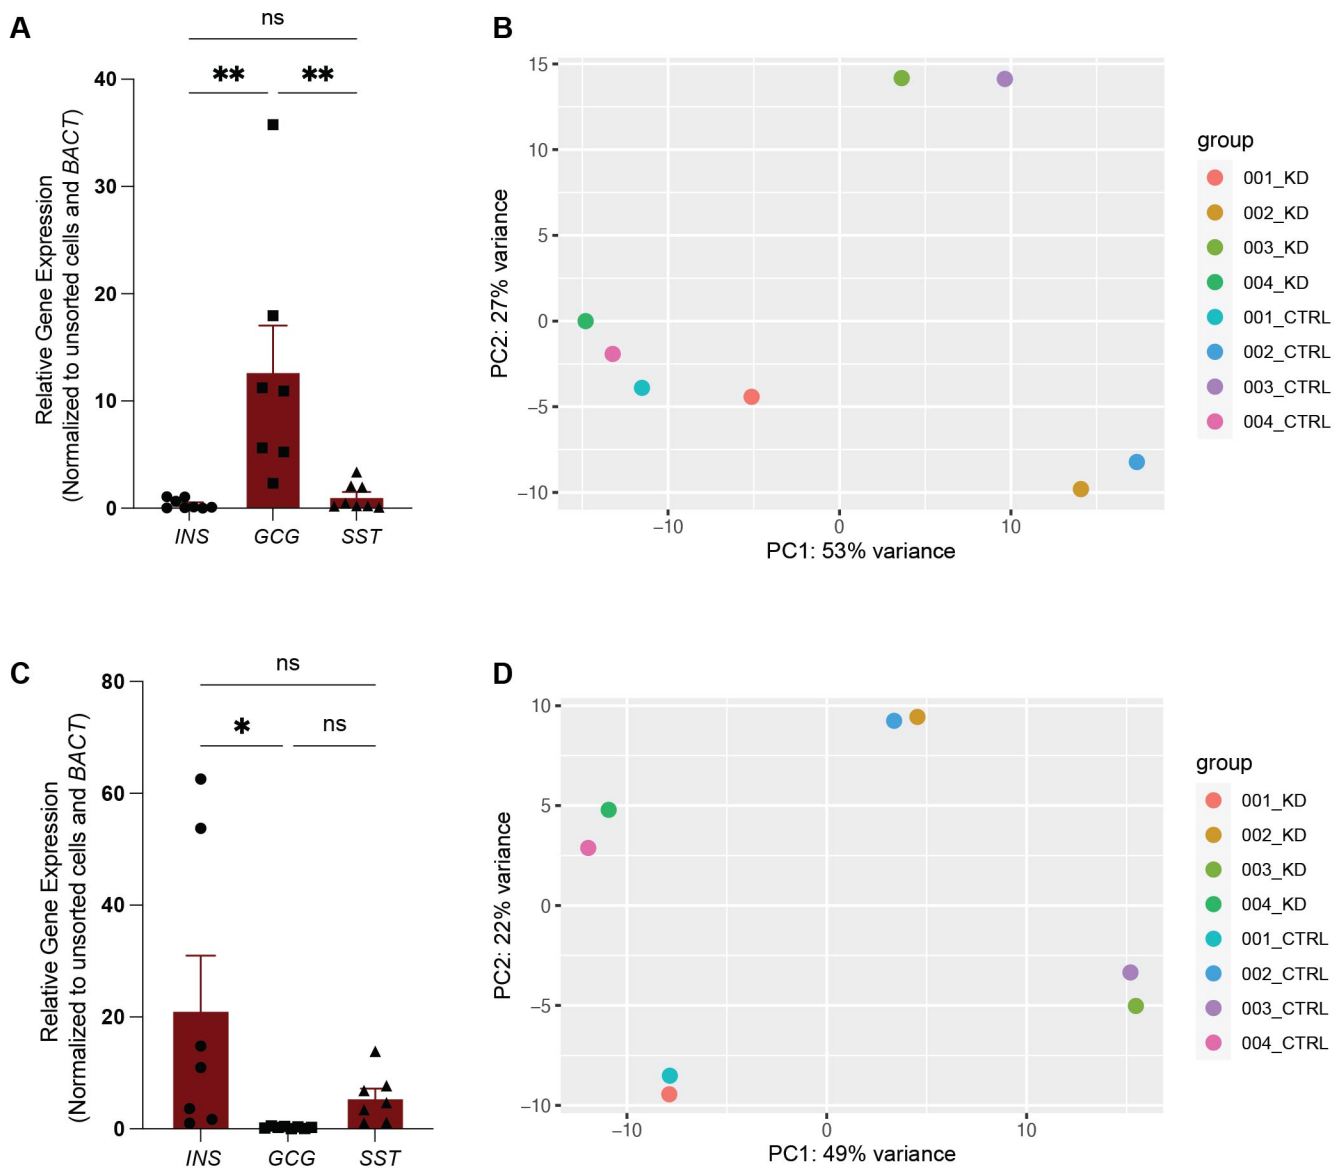

**Figure S5. *CD26*<sup>+</sup> and *NTPDase3*<sup>+</sup> sorted populations - hormone enrichment and PCA.** (A) Assessment of *INS*, *GCG*, and *SST* expression in *CD26*<sup>+</sup> sorted cells by qRT-PCR, normalized to unsorted cells and *BACT*; n=4 donors. (B) PCA plot of *CD26*<sup>+</sup> sorted cell samples, control and knockdown; n=4 donors (C) Assessment of *INS*, *GCG*, and *SST* expression in *NTPDase3*<sup>+</sup> sorted cells by qRT-PCR, normalized to unsorted cells and *BACT*; n=4 donors. (D) PCA plot of *NTPDase3*<sup>+</sup> sorted cell samples, control and knockdown; n=4 donors. The data are presented as mean values  $\pm$  SEM. Two-tailed paired t-tests used to generate P-values: (\*)  $P < 0.05$ , (\*\*)  $P < 0.01$ .
