# Supplementary material
Source: publisher figshare collection journal article supplement (https://diabetesjournals.figshare.com/articles/dataset/_/24615675)
Supplement: Supplementary file 10 [file 2]

Supplemental Figure S3

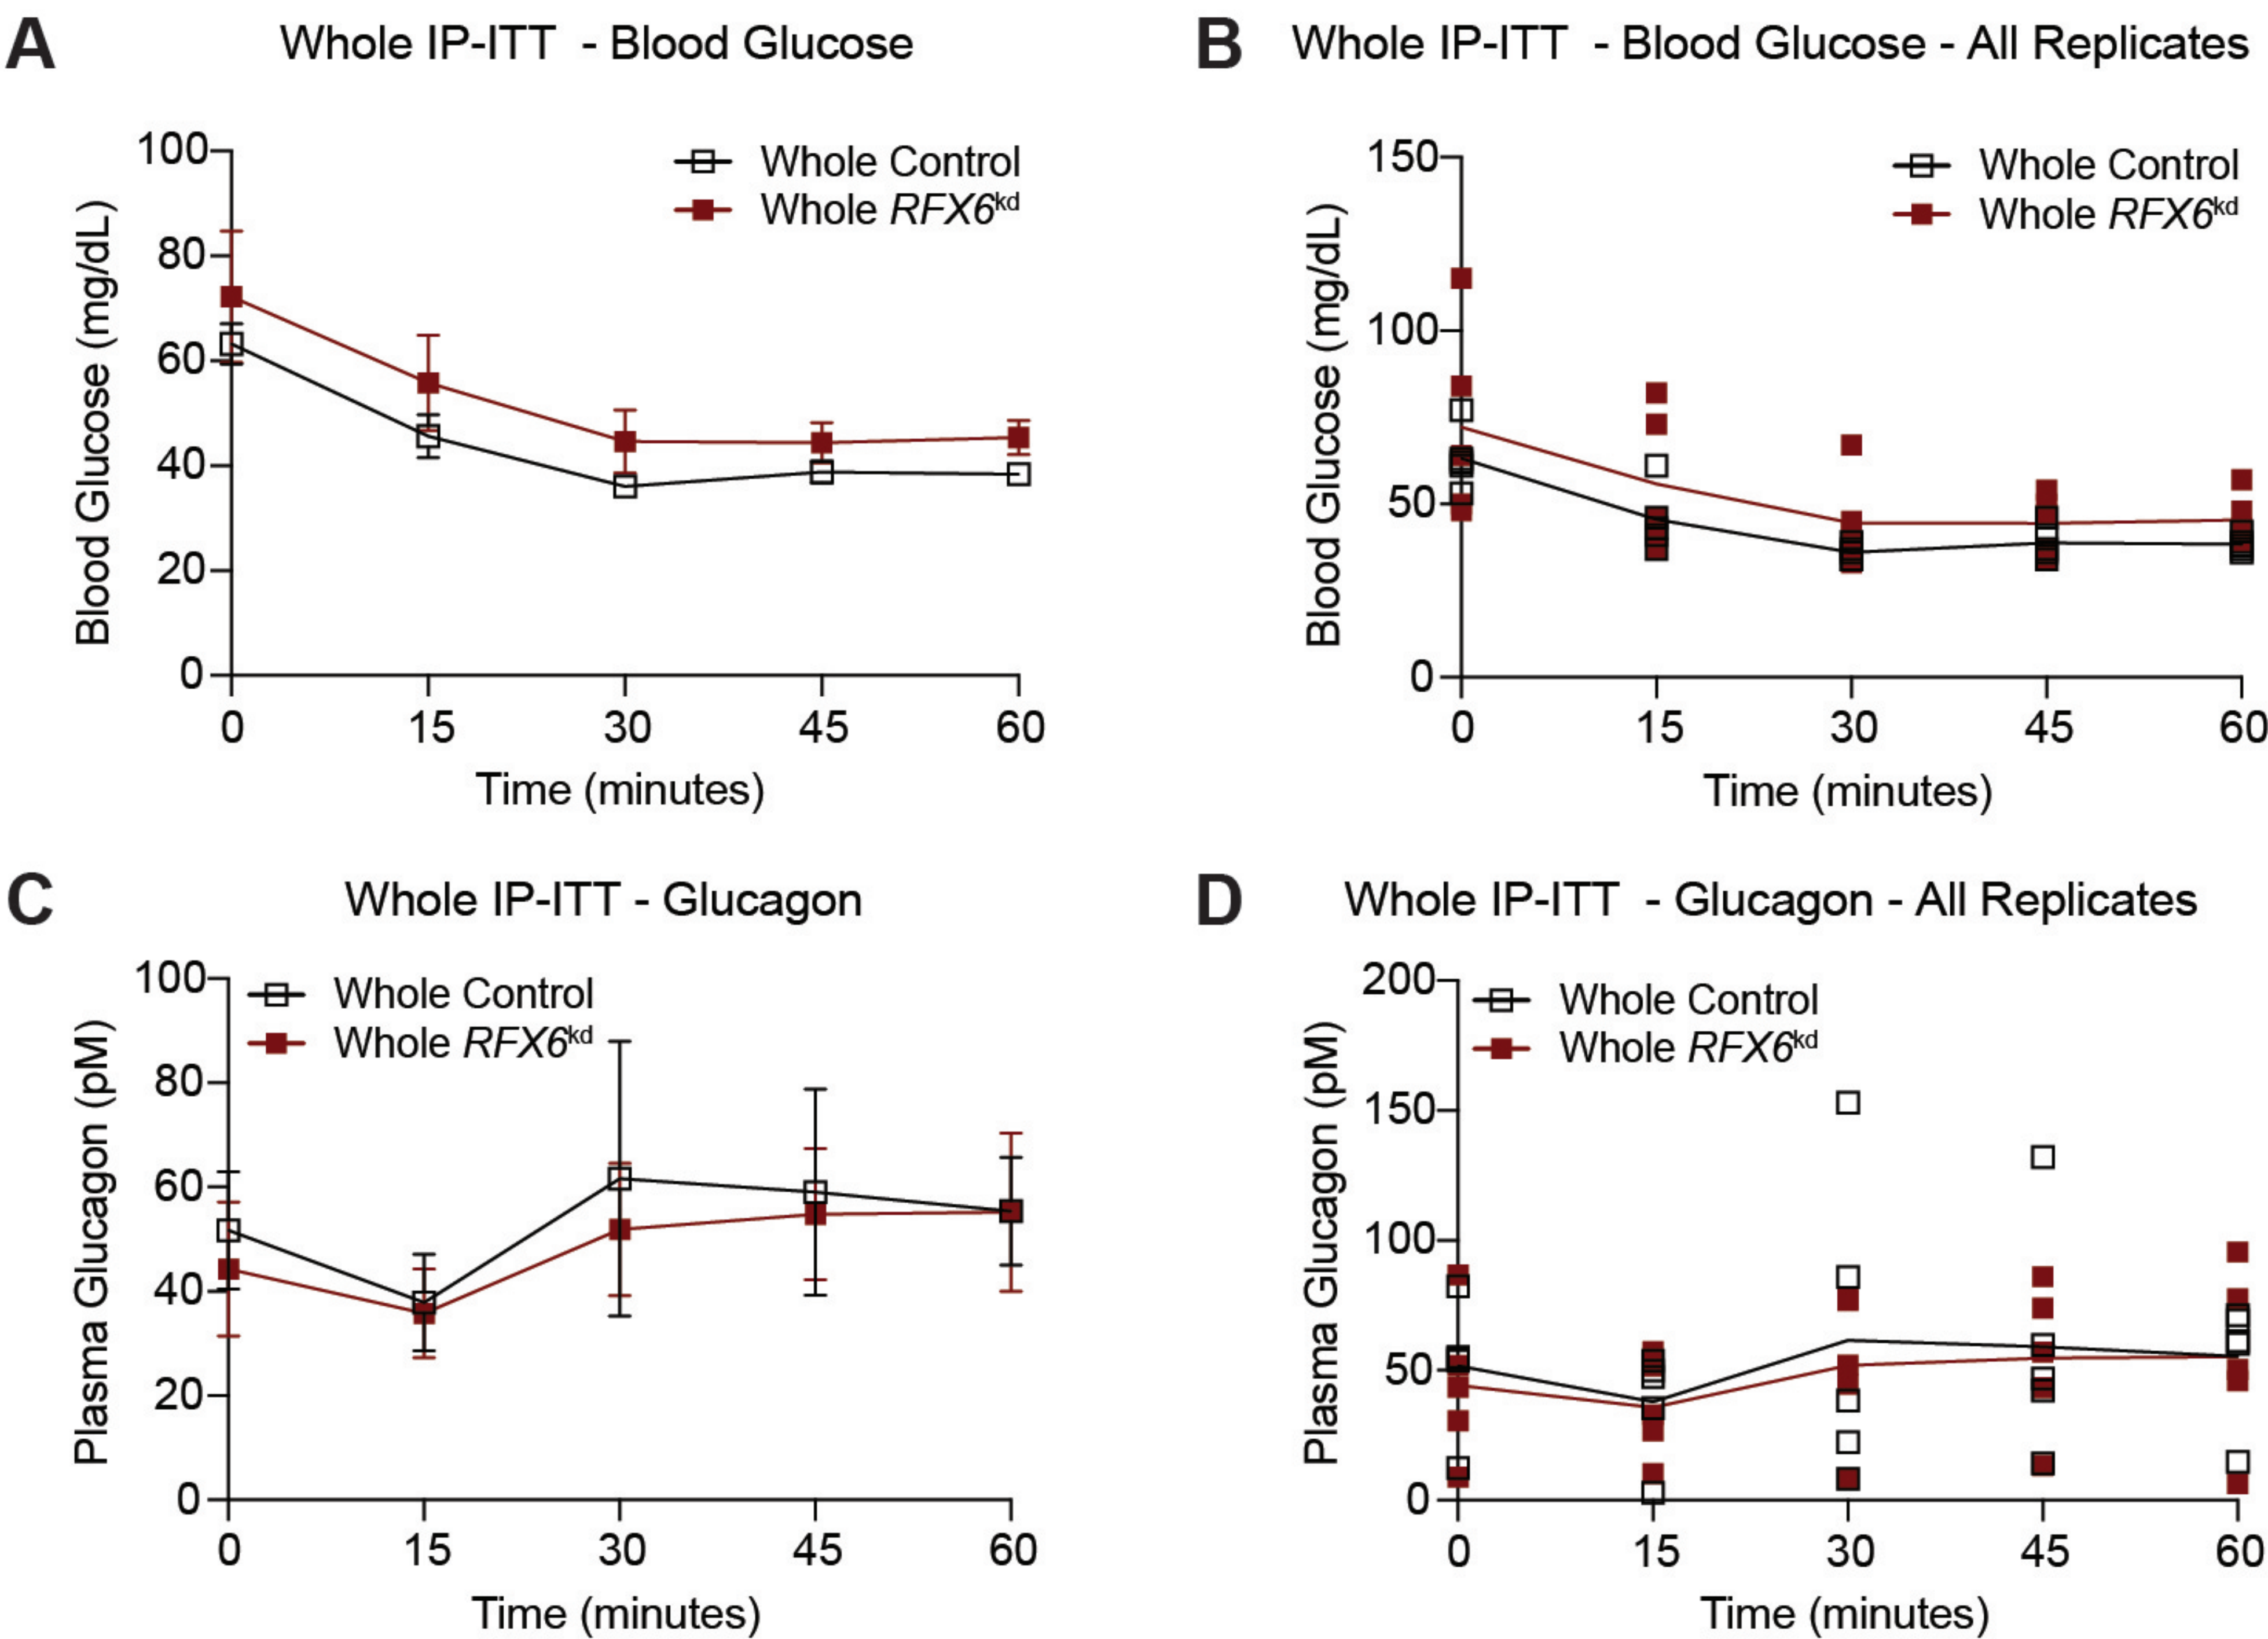

**Figure S3. IP-ITT of whole pseudoislet transplanted GKO-NSG mice.** Summary (A,C) and individually plotted (B,D) blood glucose (A-B) and plasma glucagon (C-D) curves upon intraperitoneal insulin tolerance test (IP-ITT) after transplantation of donor-matched whole control (n=5 mice) and *RFX6<sup>kd</sup>* (n=5 mice) pseudoislets to GKO-NSG mice; n=5 donors. The data are presented as mean values  $\pm$  SEM or individual replicates.
