# Supplementary material
Source: publisher figshare collection journal article supplement (https://diabetesjournals.figshare.com/articles/dataset/_/24615675)
Supplement: Supplementary file 12 [file 2]

Supplemental Figure S2

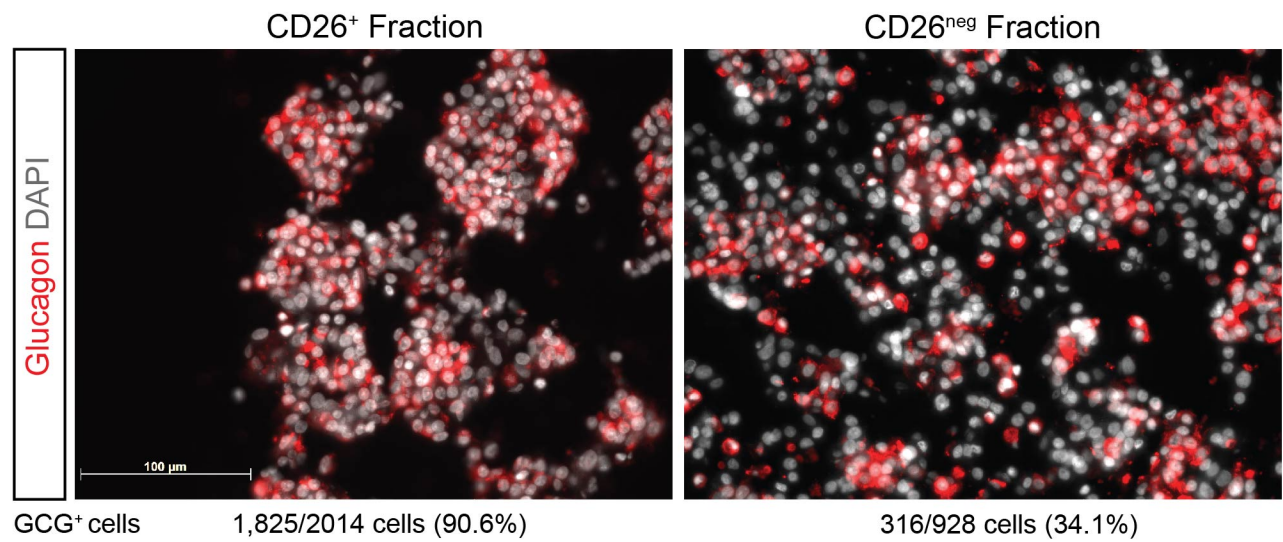

**Figure S2. Enrichment of GCG<sup>+</sup>  $\alpha$  cells in the CD26<sup>+</sup> cell fraction.** Staining for glucagon (red) and DAPI (gray) in representative histological sections of CD26<sup>+</sup> and CD26<sup>neg</sup> cell fractions embedded in collagen, and quantification of hormone-positive cells via ImageJ. Scale bars are 100 $\mu$ m.
