# Supplementary material
Source: publisher figshare collection journal article supplement (https://diabetesjournals.figshare.com/articles/dataset/_/24615675)
Supplement: Supplementary file 14 [file 2]

**Supplemental Table S6**

|            | baseMean   | log2FoldChan | lfcSE      | stat       | pvalue     | padj       |
|------------|------------|--------------|------------|------------|------------|------------|
| KLHDC8A    | 1867.66249 | -1.0227236   | 0.14358235 | -7.1229066 | 1.06E-12   | 3.70E-09   |
| NCAM1      | 2210.0475  | -0.7825851   | 0.13271637 | -5.8966736 | 3.71E-09   | 7.43E-06   |
| SLIT1      | 621.052937 | -0.986184    | 0.17581245 | -5.6092956 | 2.03E-08   | 3.56E-05   |
| HSPA1A     | 21262.7161 | -0.813412    | 0.14856068 | -5.4752843 | 4.37E-08   | 5.69E-05   |
| ESYT1      | 9813.65787 | -0.5951763   | 0.10878249 | -5.4712512 | 4.47E-08   | 5.69E-05   |
| VIM        | 2564.82208 | -0.822016    | 0.1514255  | -5.4285175 | 5.68E-08   | 6.41E-05   |
| LRP5       | 1656.49007 | -0.8392812   | 0.15647197 | -5.3637797 | 8.15E-08   | 8.16E-05   |
| ADAMTSL2   | 1171.5032  | -0.93524     | 0.17557828 | -5.326627  | 1.00E-07   | 9.35E-05   |
| MMRN1      | 1055.58018 | -0.9445487   | 0.18170381 | -5.1982879 | 2.01E-07   | 0.00017622 |
| SLC16A2    | 396.372816 | -1.0981875   | 0.21352248 | -5.1431938 | 2.70E-07   | 0.00022273 |
| ACLY       | 16174.6656 | -0.6568734   | 0.13130371 | -5.0027028 | 5.65E-07   | 0.0003972  |
| SEZ6L      | 6696.50366 | -0.560015    | 0.11200965 | -4.9997033 | 5.74E-07   | 0.0003972  |
| KCNA5      | 416.52104  | -1.4230564   | 0.28913516 | -4.9217687 | 8.58E-07   | 0.00054648 |
| RAB15      | 2983.81267 | -0.7588411   | 0.15875108 | -4.7800692 | 1.75E-06   | 0.00106802 |
| HILPDA     | 2975.6538  | -0.6728396   | 0.14219164 | -4.7319205 | 2.22E-06   | 0.00125305 |
| DNAJB1     | 9004.81556 | -0.5702804   | 0.12184795 | -4.6802628 | 2.87E-06   | 0.0014875  |
| MAN1A1     | 15008.7687 | -0.4876357   | 0.11252726 | -4.3334892 | 1.47E-05   | 0.00663659 |
| C1orf127   | 997.525621 | -0.7470707   | 0.17387492 | -4.2965983 | 1.73E-05   | 0.00759772 |
| TMEM64     | 3017.81147 | -0.5381962   | 0.12578077 | -4.278843  | 1.88E-05   | 0.00798038 |
| HDAC6      | 1361.5374  | -0.7556455   | 0.17776466 | -4.2508195 | 2.13E-05   | 0.00829359 |
| CDH10      | 1476.6856  | -0.6862481   | 0.16130555 | -4.2543369 | 2.10E-05   | 0.00829359 |
| CPD        | 17448.7954 | -0.5411724   | 0.12832956 | -4.2170521 | 2.48E-05   | 0.00937754 |
| PFKP       | 2995.21849 | -0.5199645   | 0.12441204 | -4.1793741 | 2.92E-05   | 0.01050676 |
| ADAMTS2    | 1761.99573 | -0.6095734   | 0.14611255 | -4.1719443 | 3.02E-05   | 0.01058399 |
| APCDD1L    | 1487.97644 | -0.5600342   | 0.13448755 | -4.1642085 | 3.12E-05   | 0.01068221 |
| IL17RB     | 3421.72988 | -0.6287443   | 0.15142873 | -4.1520806 | 3.29E-05   | 0.01099632 |
| PTPRN2     | 4544.18034 | -0.5030843   | 0.12197213 | -4.1245845 | 3.71E-05   | 0.01210779 |
| IGSF1      | 2177.59797 | -0.5992757   | 0.14629369 | -4.0963879 | 4.20E-05   | 0.01315906 |
| CACNA2D1   | 6763.98756 | -0.4669754   | 0.11403944 | -4.0948583 | 4.22E-05   | 0.01315906 |
| TMEM132D   | 1318.85129 | -0.6789708   | 0.16804515 | -4.0404071 | 5.34E-05   | 0.01486651 |
| RAP1GAP2   | 2419.89312 | -0.5429315   | 0.13428411 | -4.0431556 | 5.27E-05   | 0.01486651 |
| BAIAP3     | 961.385454 | -0.7206949   | 0.1803968  | -3.9950539 | 6.47E-05   | 0.01743611 |
| HSPA1B     | 13798.178  | -0.5710509   | 0.14374463 | -3.9726764 | 7.11E-05   | 0.0181137  |
| PRSS23     | 29608.6254 | -0.5259135   | 0.13234709 | -3.9737441 | 7.08E-05   | 0.0181137  |
| COL9A2     | 442.381964 | -0.9153245   | 0.23133633 | -3.9566832 | 7.60E-05   | 0.01902383 |
| RFX6       | 3110.62612 | -1.664044    | 0.42263726 | -3.9372866 | 8.24E-05   | 0.0199786  |
| CHDH       | 1290.60305 | -0.6392894   | 0.16239849 | -3.9365477 | 8.27E-05   | 0.0199786  |
| AF011889.5 | 9302.39235 | -0.4831687   | 0.12384336 | -3.9014506 | 9.56E-05   | 0.0220992  |
| DNM3       | 978.237297 | -0.7217087   | 0.1859788  | -3.8805969 | 0.0001042  | 0.02318543 |
| C12orf75   | 2529.32675 | -0.6751948   | 0.1745325  | -3.868591  | 0.00010947 | 0.02397649 |
| DNAJC6     | 1582.283   | -0.7267074   | 0.19077067 | -3.8093248 | 0.00013935 | 0.02836674 |

|          |            |            |            |            |            |            |
|----------|------------|------------|------------|------------|------------|------------|
| CACNA1A  | 1105.69227 | -0.5721347 | 0.15004118 | -3.8131843 | 0.00013719 | 0.02836674 |
| ROBO1    | 2210.04701 | -0.5349755 | 0.14031212 | -3.8127534 | 0.00013743 | 0.02836674 |
| IDS      | 21668.5043 | -0.476266  | 0.12523166 | -3.8030798 | 0.00014291 | 0.02861841 |
| SEZ6     | 995.195181 | -0.7600826 | 0.2000563  | -3.7993437 | 0.00014508 | 0.02864407 |
| TMEM132B | 453.592141 | -0.8259532 | 0.21811699 | -3.786744  | 0.00015263 | 0.02903073 |
| DCTN1    | 3758.66423 | -0.5128011 | 0.13529953 | -3.7901174 | 0.00015058 | 0.02903073 |
| PCSK9    | 64.7451664 | -2.3170692 | 0.61528776 | -3.7658301 | 0.000166   | 0.03061764 |
| CAPN2    | 4984.0955  | -0.4972038 | 0.1321835  | -3.7614666 | 0.00016892 | 0.03075222 |
| PCDHA4   | 656.462292 | -0.7260984 | 0.19358394 | -3.7508193 | 0.00017626 | 0.03119022 |
| GCK      | 4121.32354 | -0.4362202 | 0.11629523 | -3.7509724 | 0.00017615 | 0.03119022 |
| EIF4EBP2 | 1467.63553 | -0.5571341 | 0.14879821 | -3.7442261 | 0.00018095 | 0.03131564 |
| MAP1A    | 3941.29559 | -0.5668687 | 0.15209079 | -3.7271732 | 0.00019364 | 0.03310289 |
| SLC5A1   | 493.184142 | -0.7147608 | 0.19277356 | -3.7077742 | 0.00020909 | 0.03531336 |
| CDON     | 1221.84024 | -0.5945895 | 0.16139767 | -3.6840028 | 0.0002296  | 0.03831582 |
| CASR     | 7416.38727 | -0.5281091 | 0.14381569 | -3.6721244 | 0.00024054 | 0.03920843 |
| NFASC    | 3703.68436 | -0.4949976 | 0.13655492 | -3.6248973 | 0.00028908 | 0.04502524 |
| STAT6    | 1077.5262  | -0.5650829 | 0.15636345 | -3.6139065 | 0.00030162 | 0.04646241 |
| SPON1    | 280.199535 | -1.2919708 | 0.35843693 | -3.6044579 | 0.00031281 | 0.04690835 |
| SUN1     | 6535.75225 | -0.531008  | 0.14760831 | -3.5974126 | 0.0003214  | 0.04742487 |
| HSPH1    | 7384.93393 | -0.5735002 | 0.16111587 | -3.5595512 | 0.00037149 | 0.0529981  |
| WFS1     | 4135.26999 | -0.4016776 | 0.11277086 | -3.561892  | 0.00036819 | 0.0529981  |
| ITGAV    | 11631.191  | -0.564007  | 0.15937695 | -3.538824  | 0.00040191 | 0.05578244 |
| PLEKHA6  | 1716.74089 | -0.5934592 | 0.16828485 | -3.5265162 | 0.00042107 | 0.0578676  |
| SLC7A14  | 765.272672 | -0.6072325 | 0.17248253 | -3.5205447 | 0.00043066 | 0.05861176 |
| SLC30A8  | 37507.5645 | -0.4161782 | 0.11845747 | -3.513313  | 0.00044256 | 0.05965142 |
| APP      | 9156.10179 | -0.5431829 | 0.15540388 | -3.4952982 | 0.00047353 | 0.06299951 |
| ABCC8    | 37863.2343 | -0.4378544 | 0.125327   | -3.4936956 | 0.00047638 | 0.06299951 |
| FAM222A  | 4423.27132 | -0.5875121 | 0.16872647 | -3.4820385 | 0.00049761 | 0.06458822 |
| GPRIN1   | 840.349675 | -0.6690639 | 0.19241073 | -3.4772691 | 0.00050655 | 0.06494087 |
| ALDH1A1  | 11575.3984 | -0.5117149 | 0.147729   | -3.4638761 | 0.00053245 | 0.06605229 |
| CNTN1    | 8382.83012 | -0.4512638 | 0.13024256 | -3.4647948 | 0.00053064 | 0.06605229 |
| NCKAP5   | 685.01247  | -0.7749314 | 0.22552624 | -3.4361032 | 0.00059015 | 0.07070657 |
| CCNY     | 2457.80805 | -0.4443289 | 0.12971197 | -3.4255042 | 0.00061366 | 0.07290067 |
| CAPN13   | 2449.73582 | -0.4228172 | 0.12357284 | -3.4216028 | 0.00062253 | 0.07333321 |
| DHX34    | 616.288379 | -0.7912316 | 0.23186791 | -3.4124237 | 0.00064388 | 0.07459423 |
| SOWAHB   | 128.814659 | -1.1827031 | 0.34729931 | -3.4054289 | 0.0006606  | 0.07528717 |
| NEO1     | 2505.04071 | -0.6128337 | 0.18051655 | -3.3948894 | 0.00068656 | 0.07761488 |
| WNT9A    | 344.461923 | -0.8081434 | 0.2385069  | -3.388344  | 0.00070316 | 0.0788552  |
| SRC      | 397.232284 | -0.8198054 | 0.24232607 | -3.3830673 | 0.00071681 | 0.07912008 |
| PROS1    | 2123.8796  | -0.4328178 | 0.1291635  | -3.3509301 | 0.00080541 | 0.08618463 |
| CLCN4    | 1639.56951 | -0.4862394 | 0.14526573 | -3.3472409 | 0.0008162  | 0.08667824 |
| LGI3     | 71.9173422 | -1.5273227 | 0.45675033 | -3.3438895 | 0.00082613 | 0.08707246 |
| FOS      | 5375.46105 | -0.4139288 | 0.12401434 | -3.3377494 | 0.0008446  | 0.08770064 |

|         |            |            |            |            |            |            |
|---------|------------|------------|------------|------------|------------|------------|
| NACAD   | 355.604582 | -0.7281209 | 0.21876656 | -3.3283007 | 0.00087378 | 0.08940568 |
| NFIC    | 2647.84097 | -0.4842974 | 0.14544397 | -3.3297867 | 0.00086913 | 0.08940568 |
| DSP     | 47427.9577 | -0.4151372 | 0.12511121 | -3.3181452 | 0.00090617 | 0.09073386 |
| KCTD12  | 175.226069 | -1.1940473 | 0.36034516 | -3.3136211 | 0.00092096 | 0.09156063 |
| SOX9    | 1704.62398 | -0.5028449 | 0.15186784 | -3.3110689 | 0.0009294  | 0.09174912 |
| FTCD    | 406.650014 | -0.6998061 | 0.21292308 | -3.2866617 | 0.00101383 | 0.09734114 |
| SYNPO   | 405.872482 | -0.6968245 | 0.21198324 | -3.2871681 | 0.001012   | 0.09734114 |
| ROR1    | 1756.99913 | -0.433448  | 0.13214745 | -3.2800327 | 0.00103795 | 0.09765095 |
| C4A     | 458.523419 | -0.8327993 | 0.25412457 | -3.2771301 | 0.00104868 | 0.09800269 |
| CACNA1C | 1499.97827 | -0.5816181 | 0.17773325 | -3.2724217 | 0.0010663  | 0.09833849 |
| NOMO2   | 6646.48963 | -0.4917899 | 0.15027145 | -3.2726766 | 0.00106534 | 0.09833849 |
| USP25   | 1438.51285 | -0.4739407 | 0.14499613 | -3.2686438 | 0.00108064 | 0.09836653 |
